# Supplementary material
Source: PubMed Central journal article supplement (PMC7497663)

# **Stereospecific Isomerization of Allylic Halides via Ion Pairs with Induced NonCovalent Chirality**

Samuel Martínez-Erro,<sup>‡</sup> Víctor García-Vázquez,<sup>‡</sup> Amparo Sanz-Marco, Belén Martín-Matute\*

belen.martin.matute@su.se

## **Supporting Information – NMR Spectra**

### **Table of contents**

- S2** <sup>1</sup>H NMR, <sup>13</sup>C NMR and <sup>19</sup>F NMR of allylic halides **2a-2o**, **3a-3c** and **4a-4c**  
**S26** <sup>1</sup>H NMR, <sup>13</sup>C NMR and <sup>19</sup>F NMR of vinyl halides **5a-5n**, **6a-6c** and **7a-7c**  
**S45** HPLC Chromatograms of allylic chlorides **2a**, **2b**, **2c**, **2d**, **2e**, **2m** and **2g**  
**S50** HPLC Chromatograms of vinyl chlorides **5a**, **5b**, **5c**, **5d**, **5e**, **5m** and **5g**

**(E)-(1-chloro-4,4,4-trifluorobut-2-ene-1,3-diyl)dibenzene (2a)**

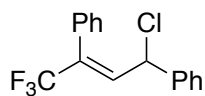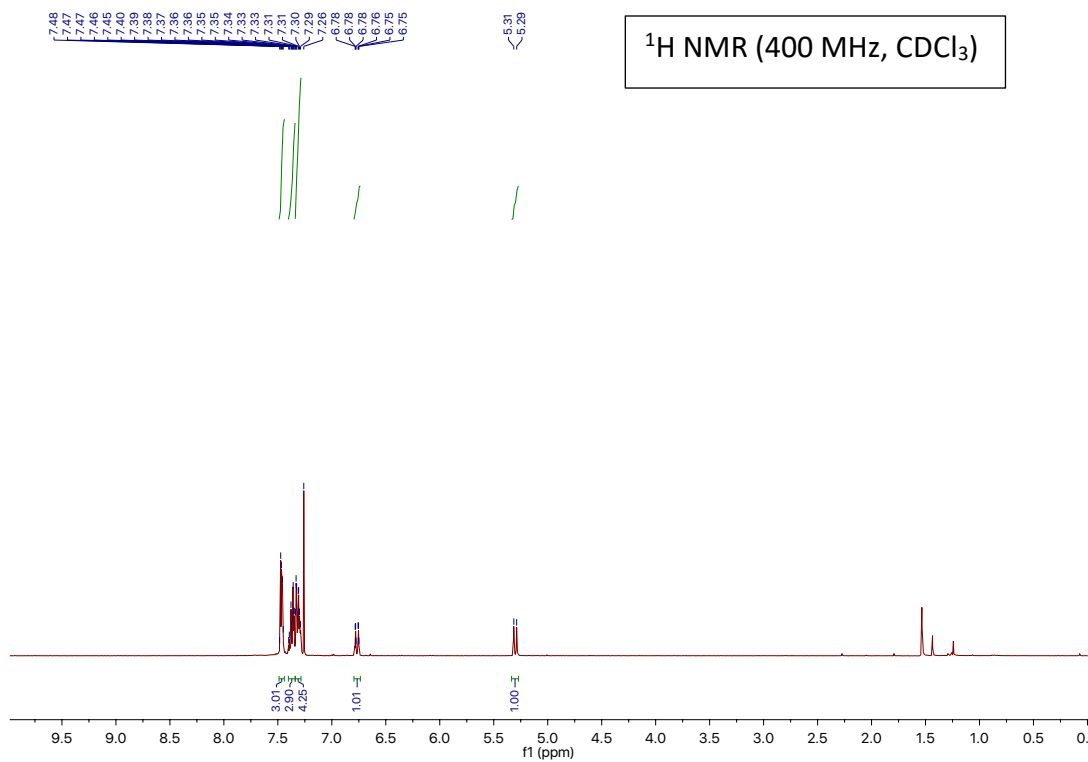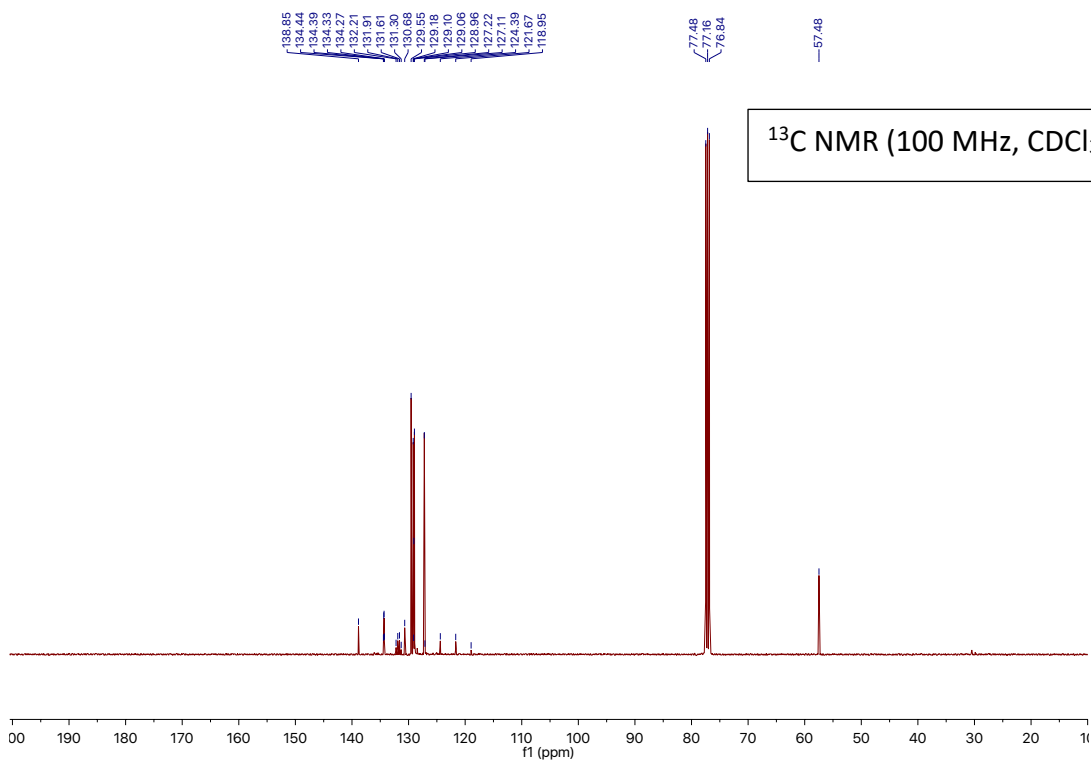

**(E)-(1-chloro-4,4,4-trifluorobut-2-ene-1,3-diyl-1-d)dibenzene (2a-d)**

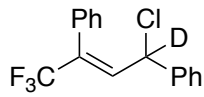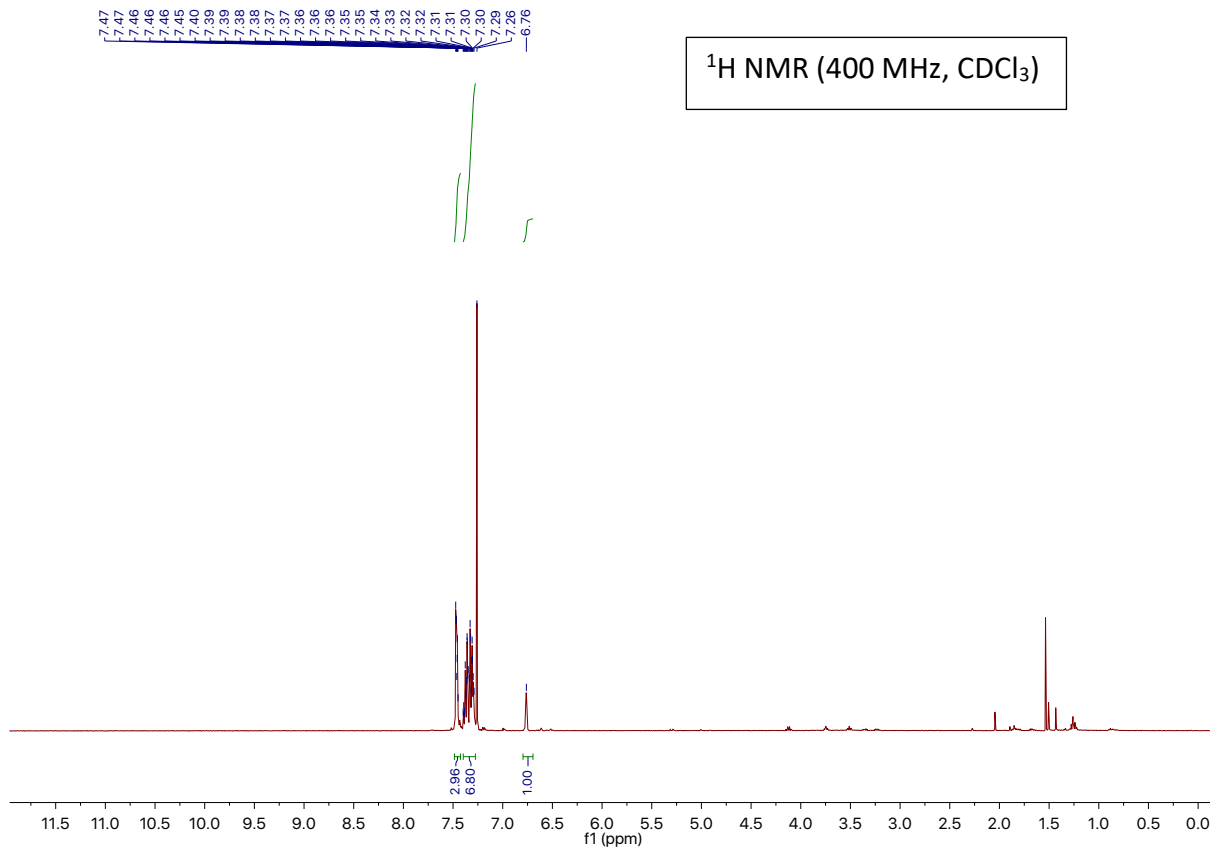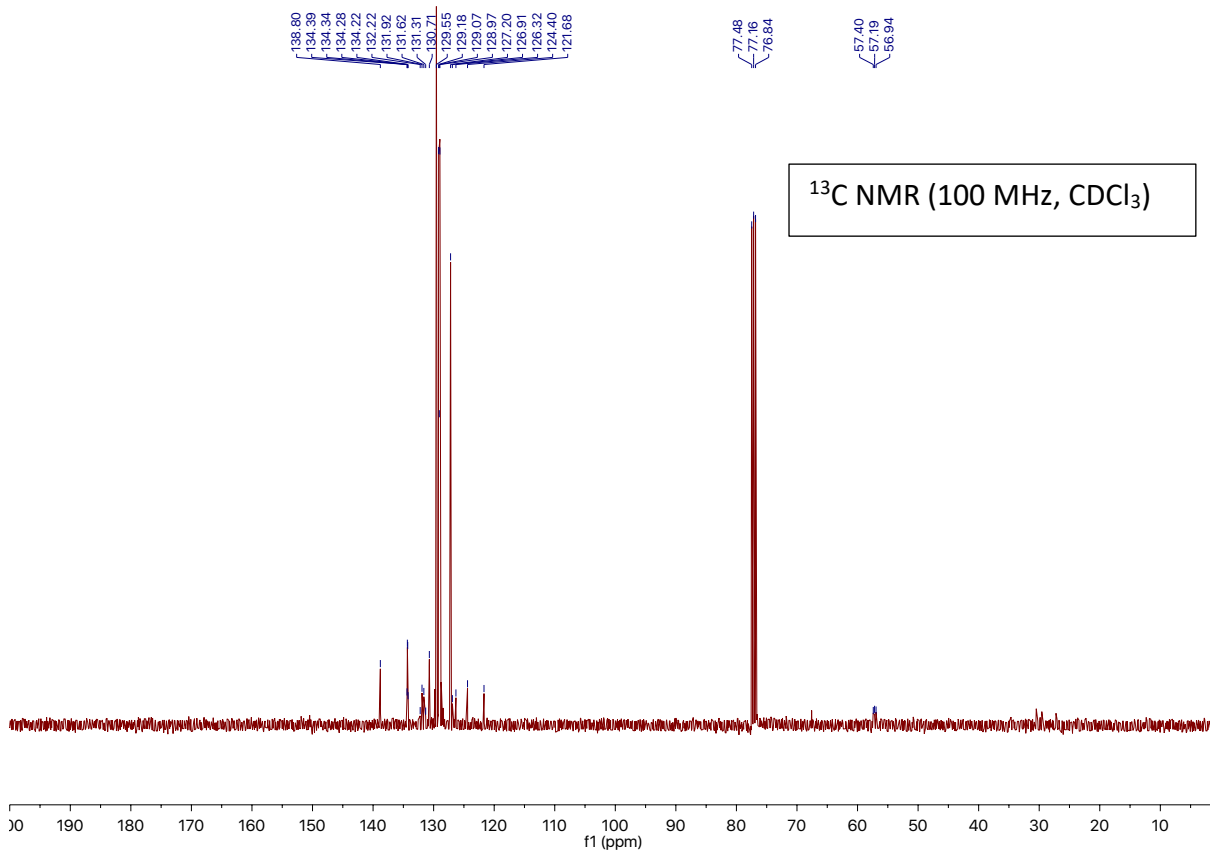

**(E)-1-Bromo-4-(1-chloro-4,4,4-trifluoro-3-phenylbut-2-en-1-yl)benzene (2b)**

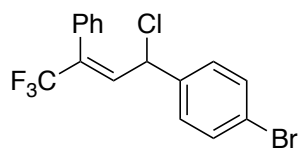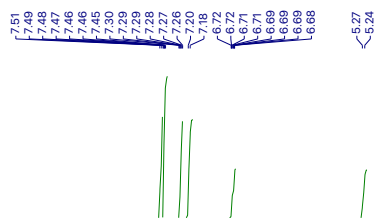

<sup>1</sup>H NMR (400 MHz, CDCl<sub>3</sub>)

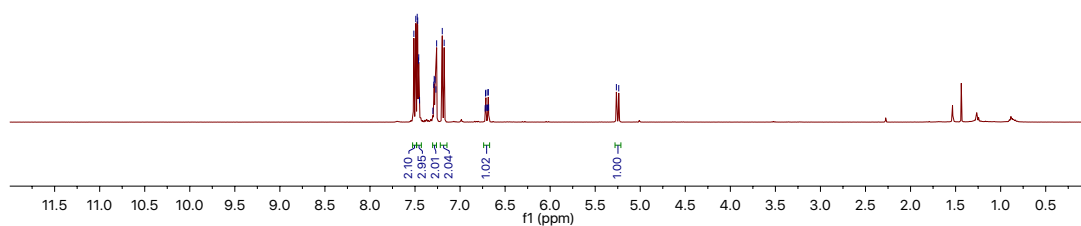

<sup>13</sup>C NMR (100 MHz, CDCl<sub>3</sub>)

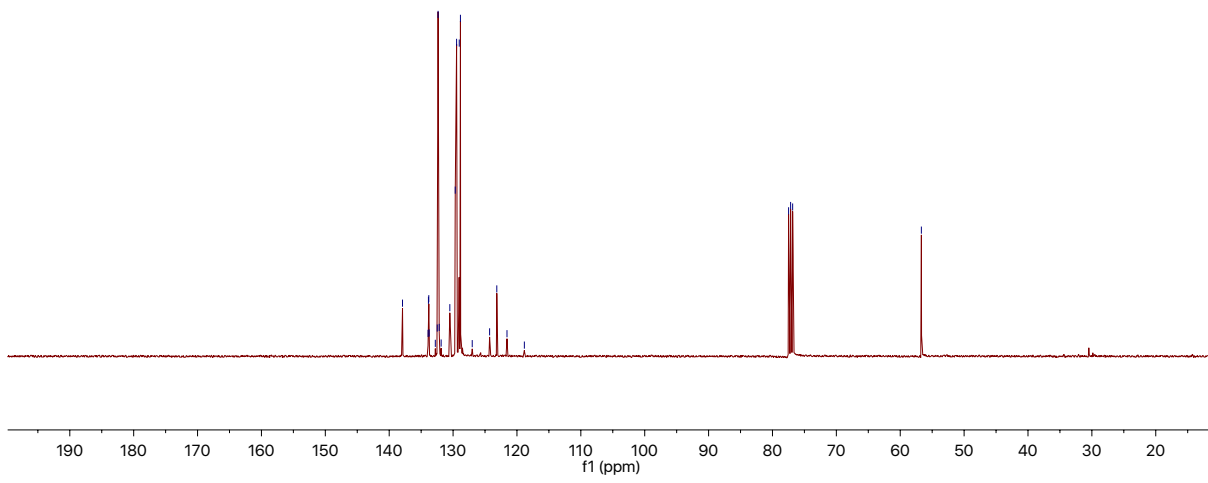

**(E)-1-(1-chloro-4,4,4-trifluoro-3-phenylbut-2-en-1-yl)-4-(trifluoromethyl)benzene (2c)**

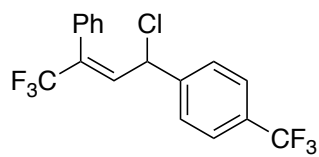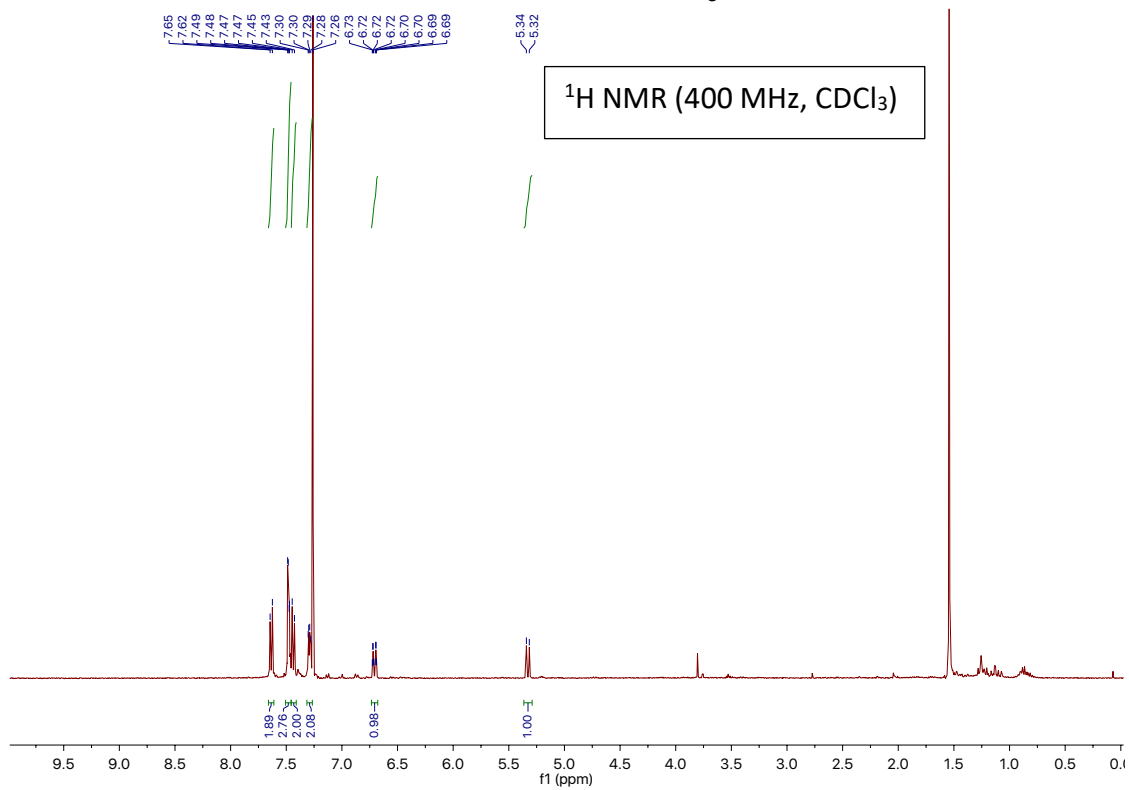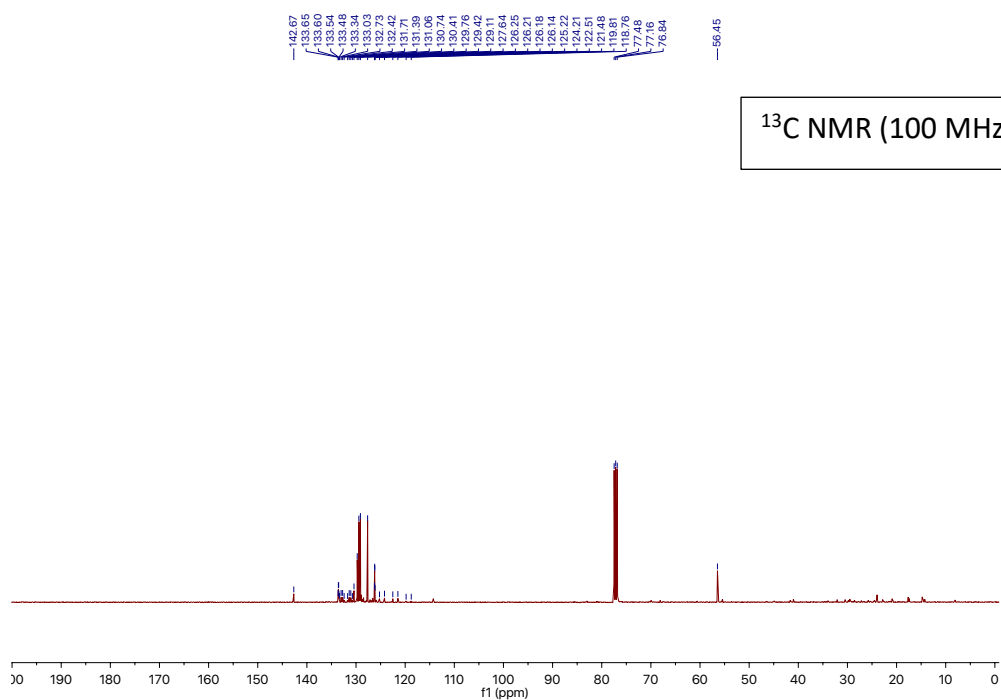

**(E)-4-(1-chloro-4,4,4-trifluoro-3-phenylbut-2-en-1-yl)benzonitrile (2d)**

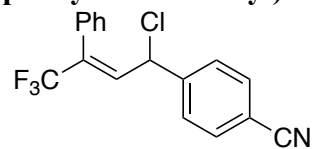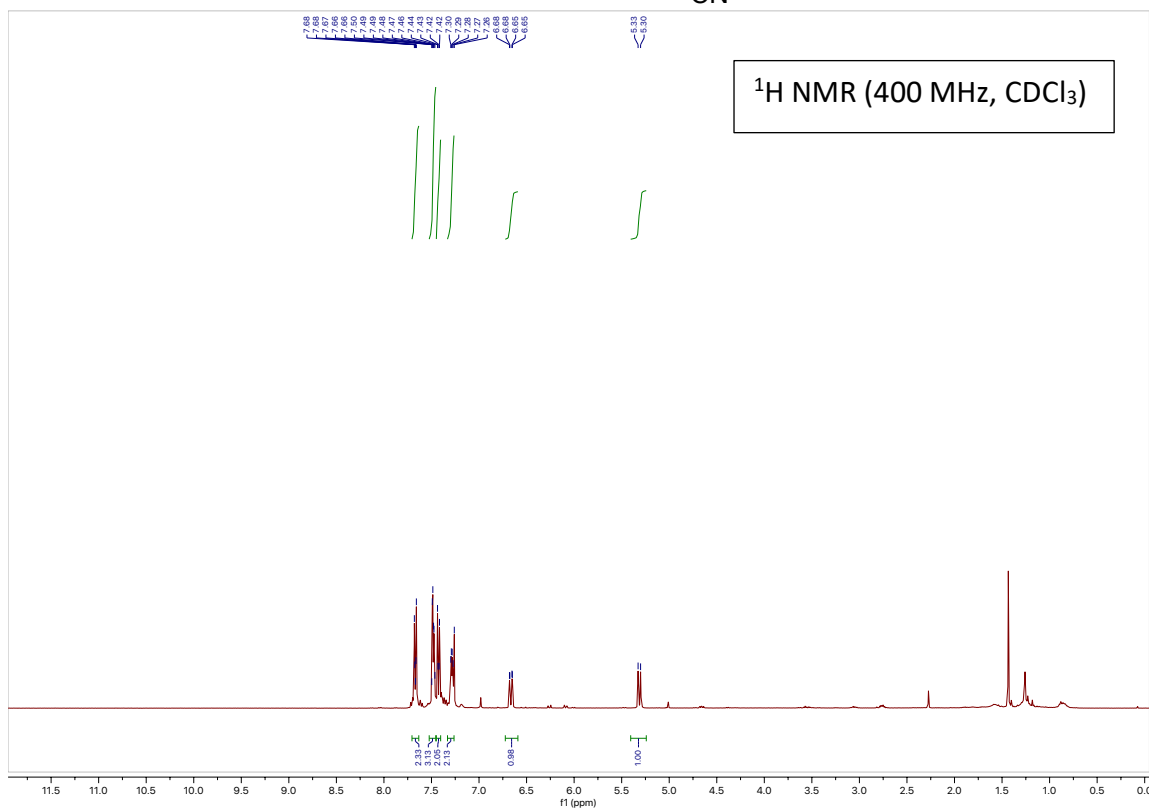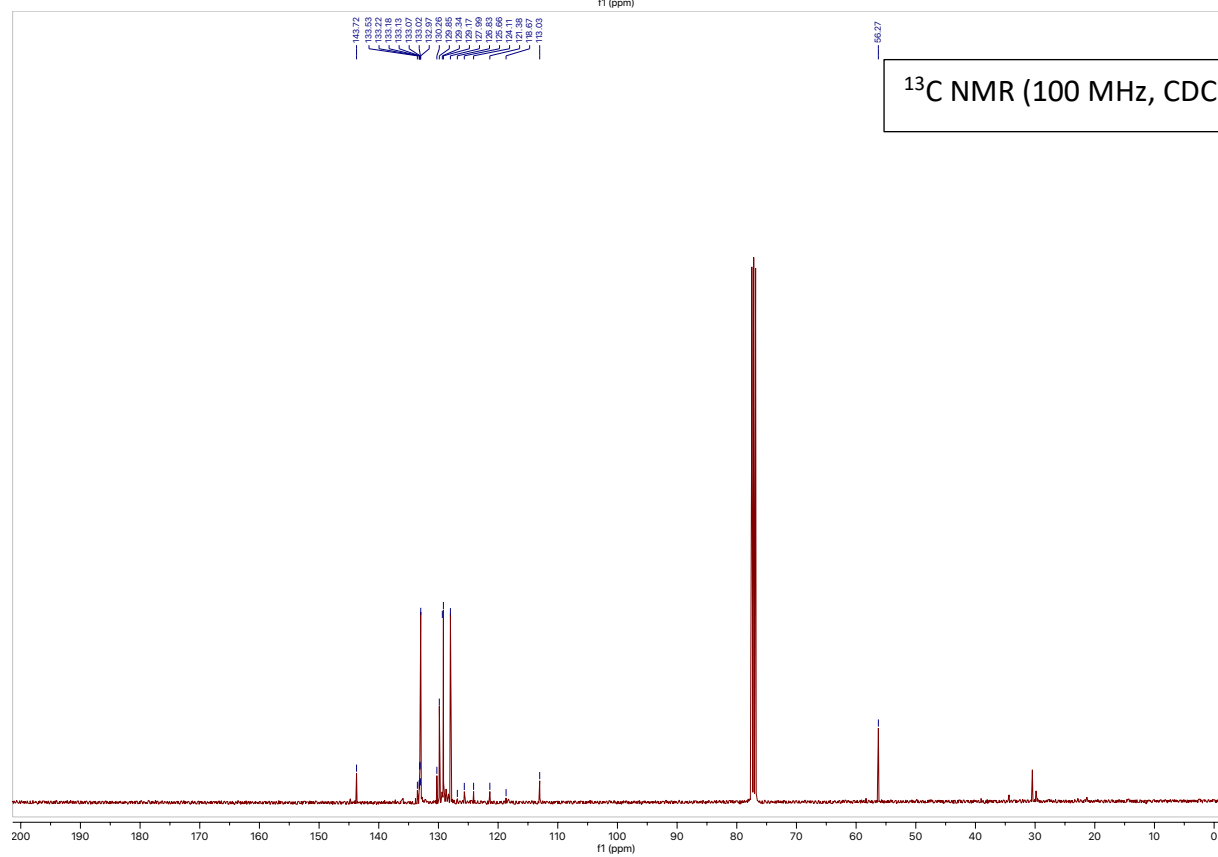

**(E)-1-(1-chloro-4,4,4-trifluoro-3-phenylbut-2-en-1-yl)-4-(methylsulfonyl)benzene (2e)**

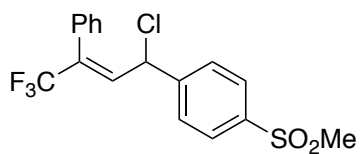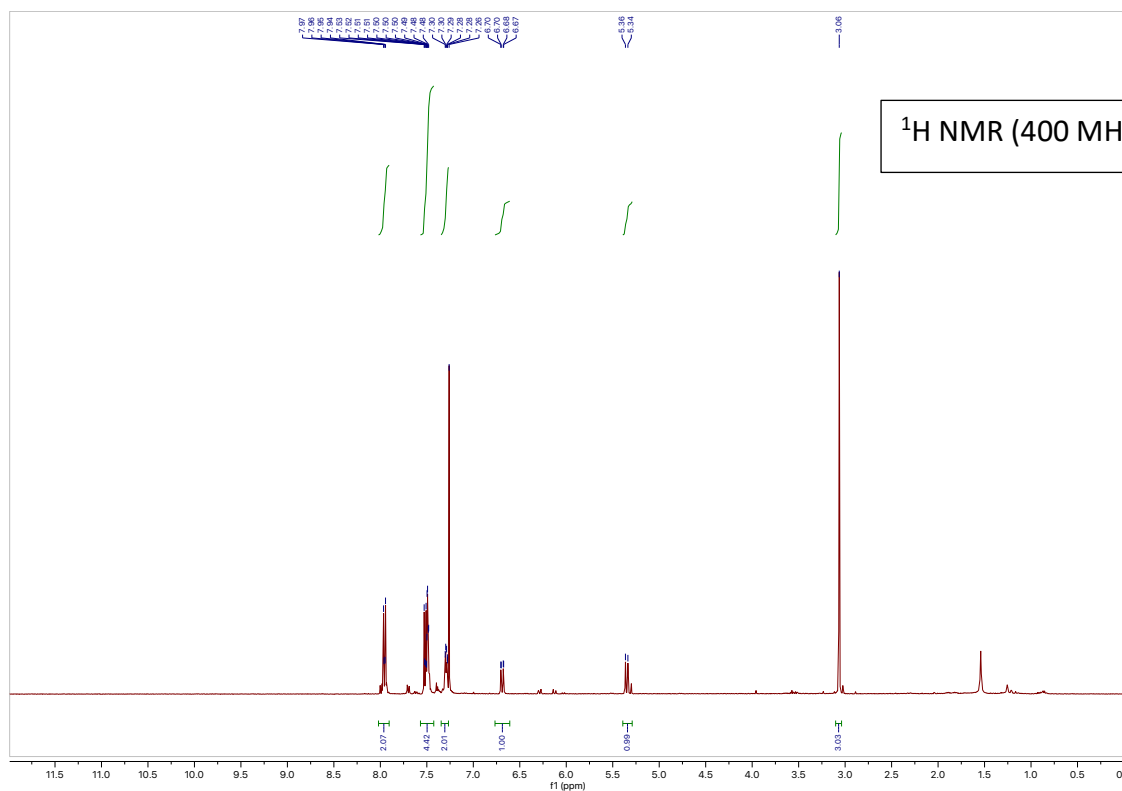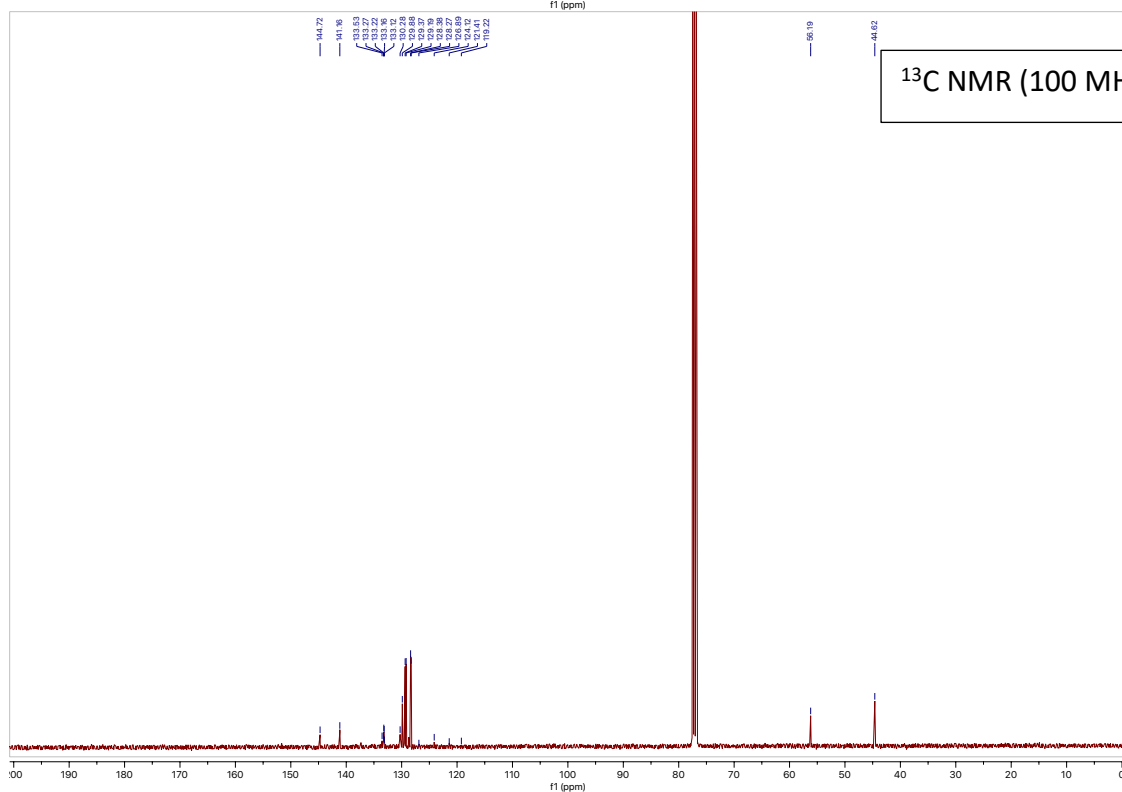

**(E)-1-(1-chloro-4,4,4-trifluoro-3-phenylbut-2-en-1-yl)-4-methylbenzene (2f)**

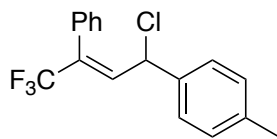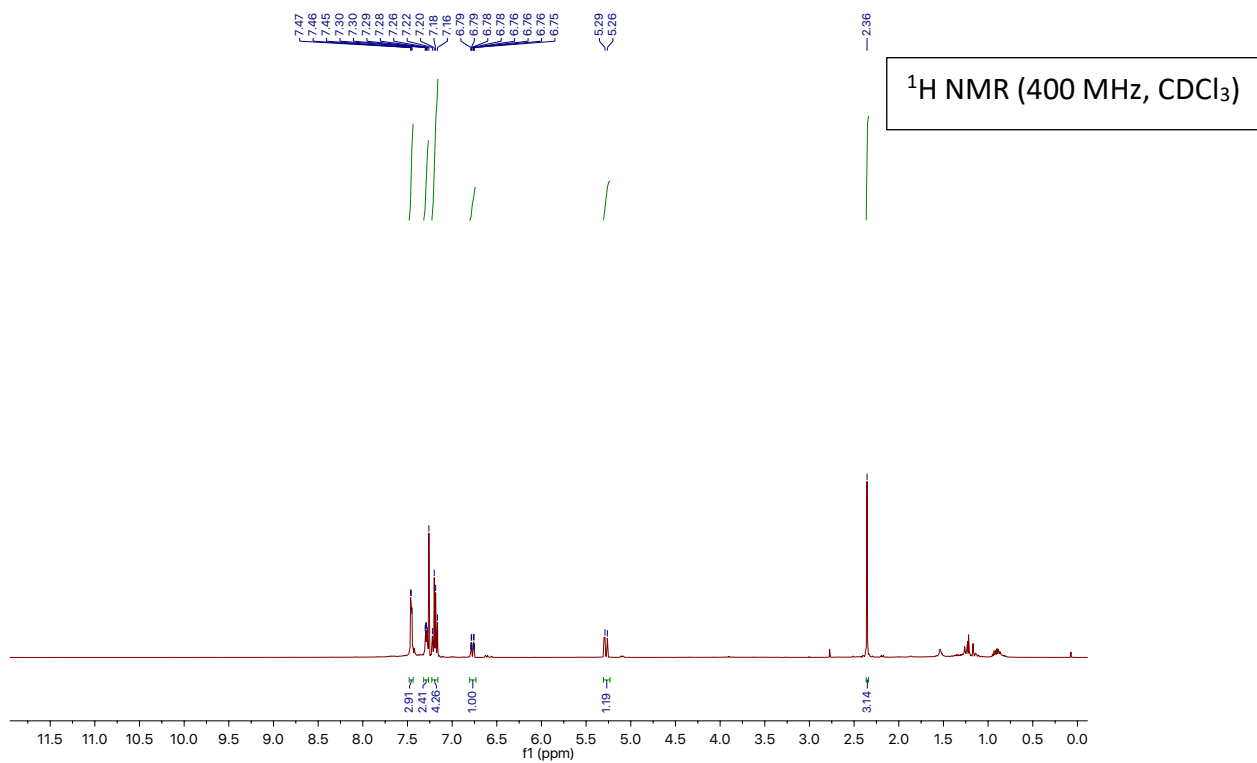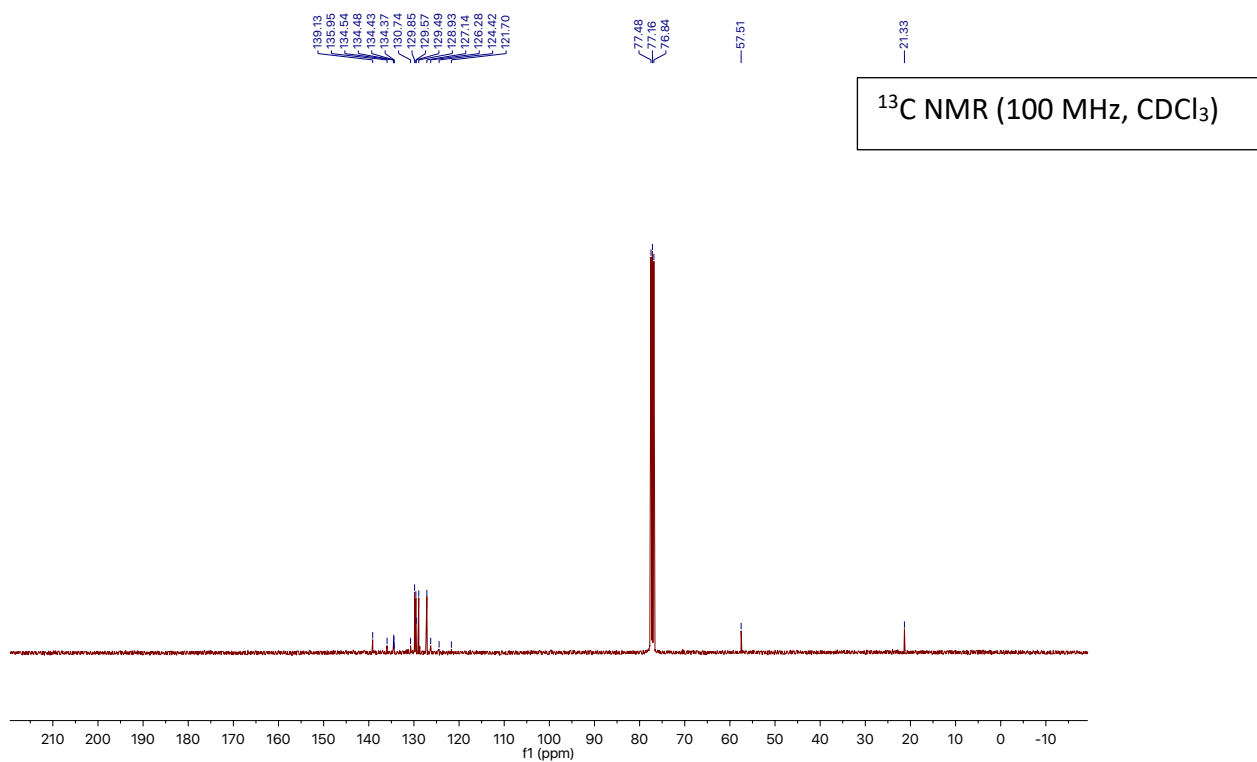



**(E)-2-(1-chloro-4,4,4-trifluoro-3-phenylbut-2-en-1-yl)naphthalene (2g)**

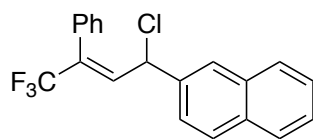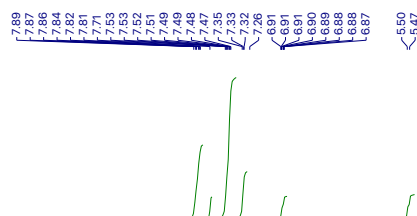

**<sup>1</sup>H NMR (400 MHz, CDCl<sub>3</sub>)**

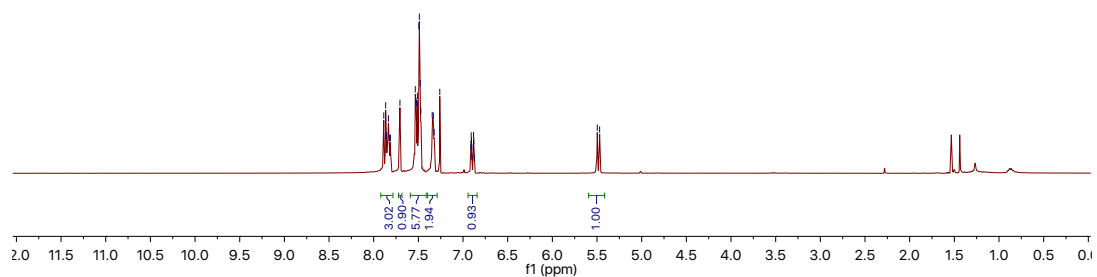

**<sup>13</sup>C NMR (100 MHz, CDCl<sub>3</sub>)**

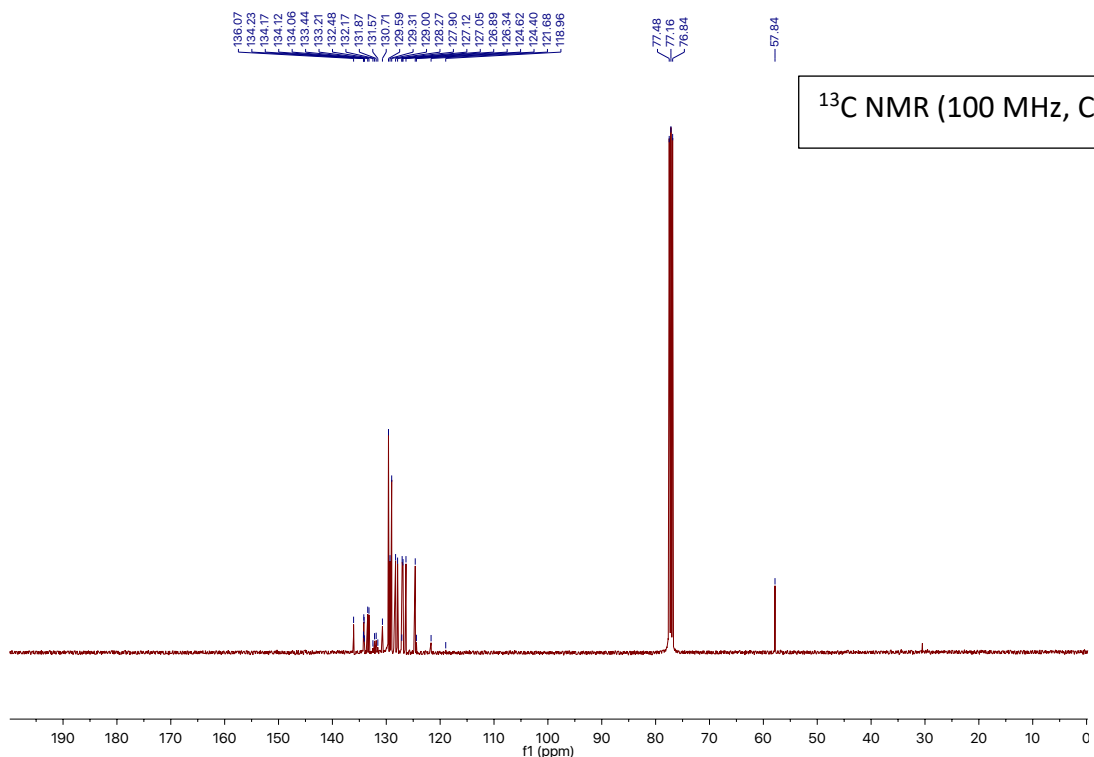

**(E)-(4-chloro-1,1,1-trifluoropent-2-en-2-yl)benzene (2h)**

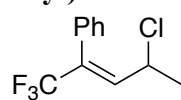

<sup>1</sup>H NMR (400 MHz, CDCl<sub>3</sub>)

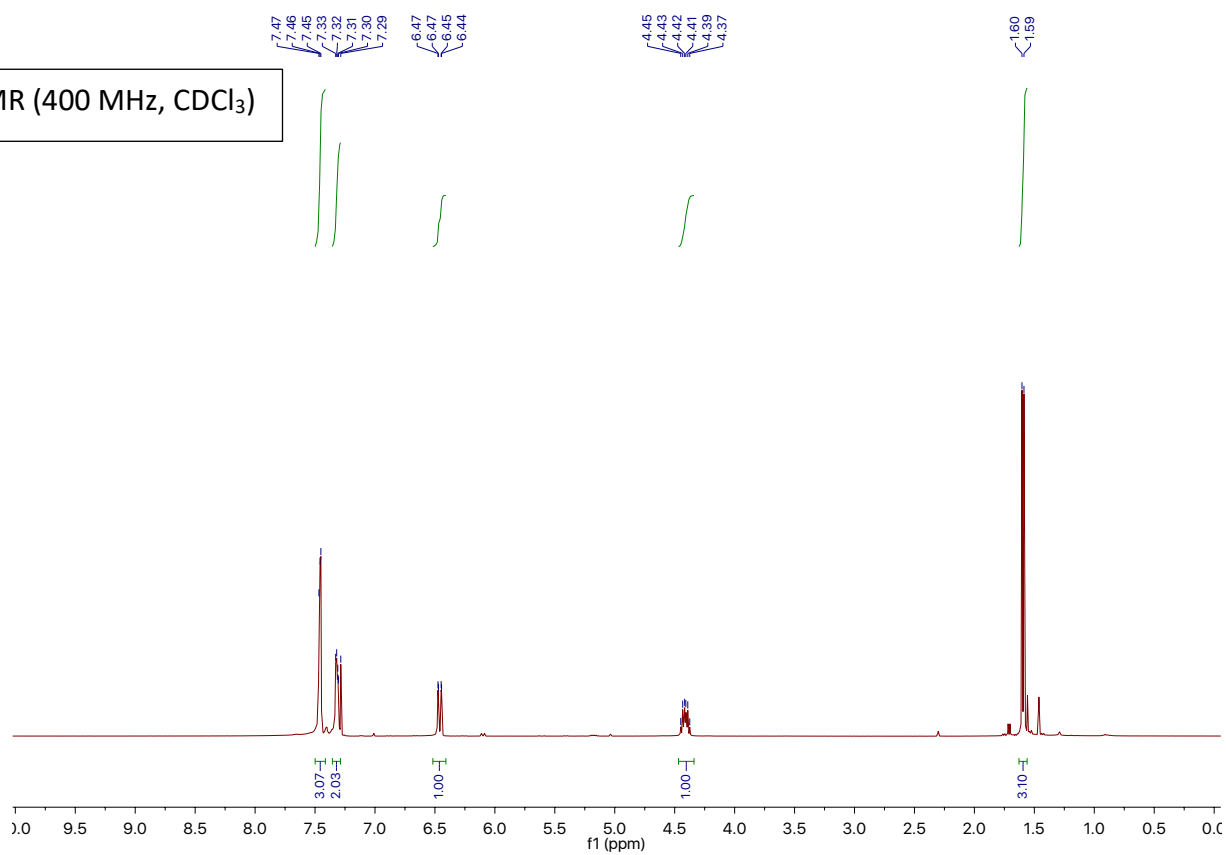

$^{13}\text{C}$  NMR (100 MHz,  $\text{CDCl}_3$ )

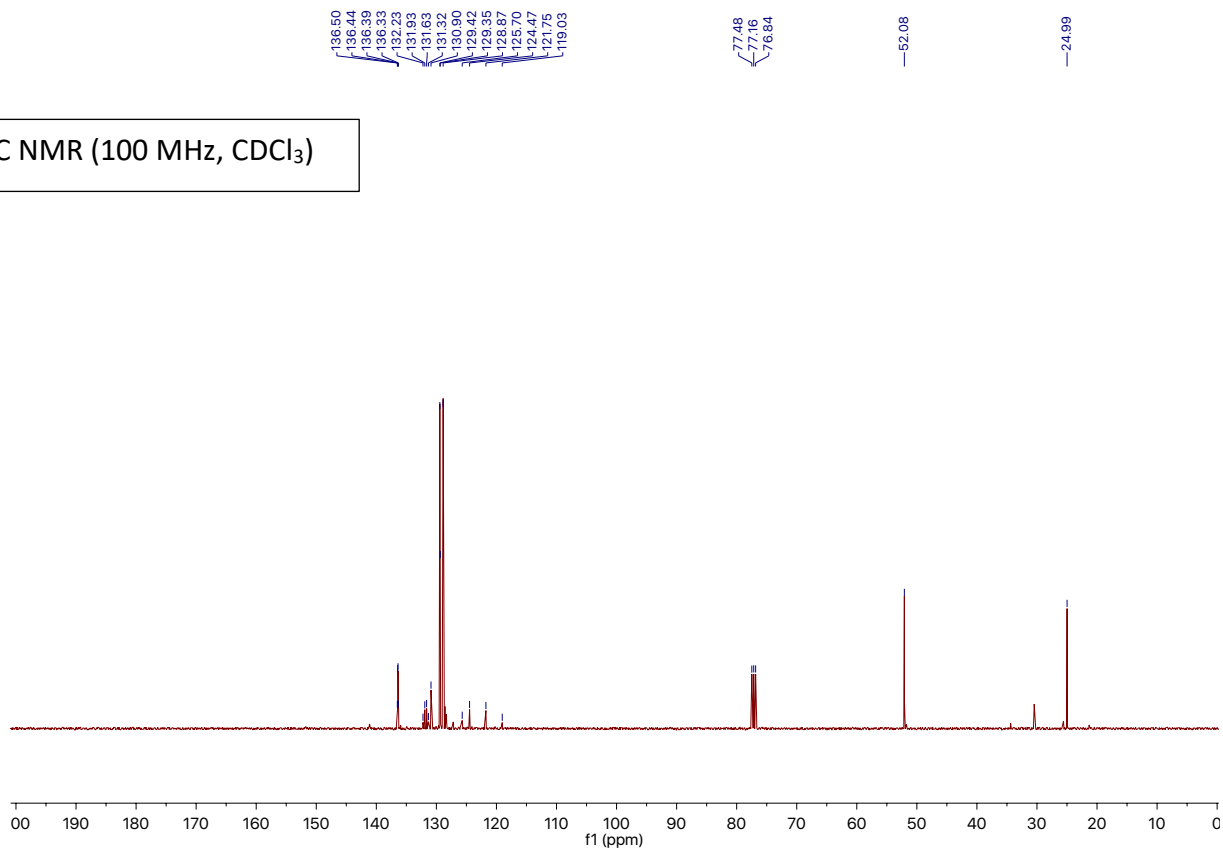

**(E)-(4-chloro-1,1,1-trifluorobut-2-en-2-yl)benzene (2i)**

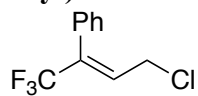

$^1\text{H}$  NMR (400 MHz,  $\text{CDCl}_3$ )

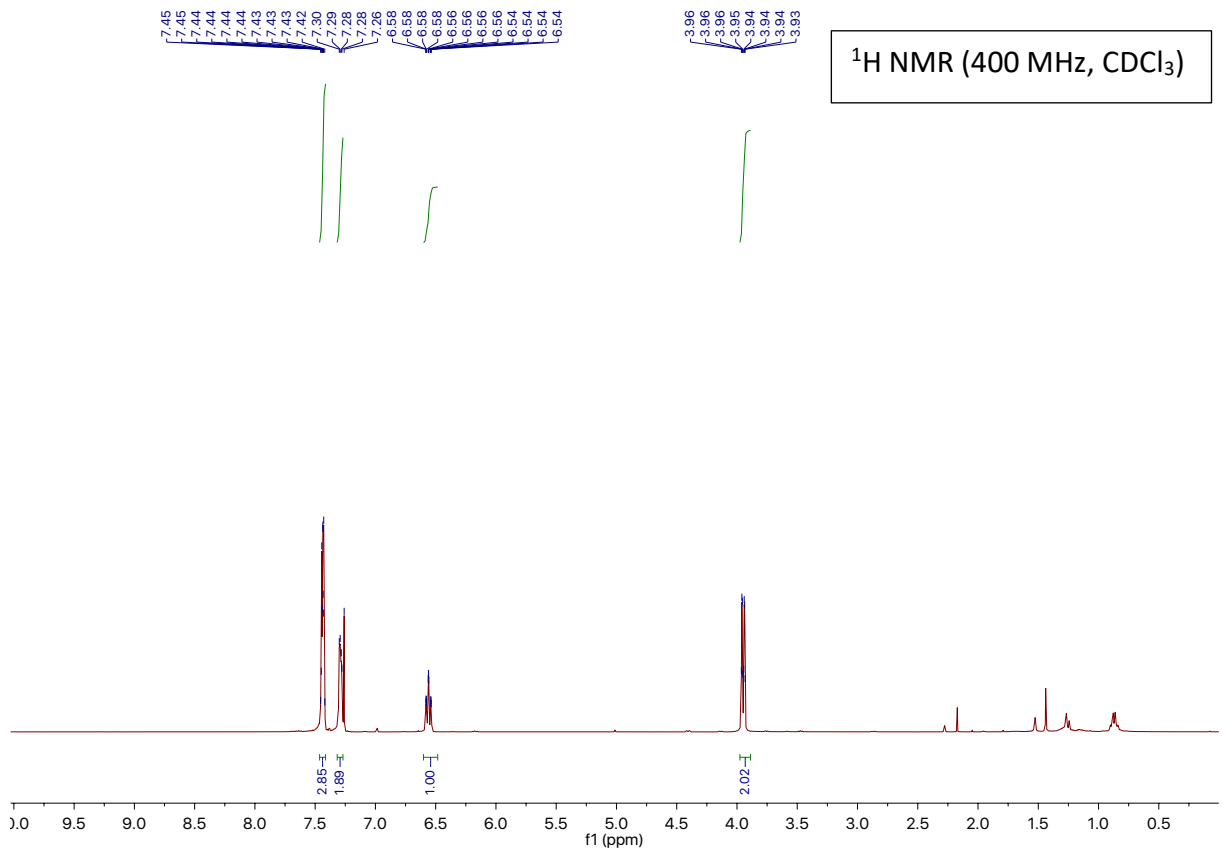



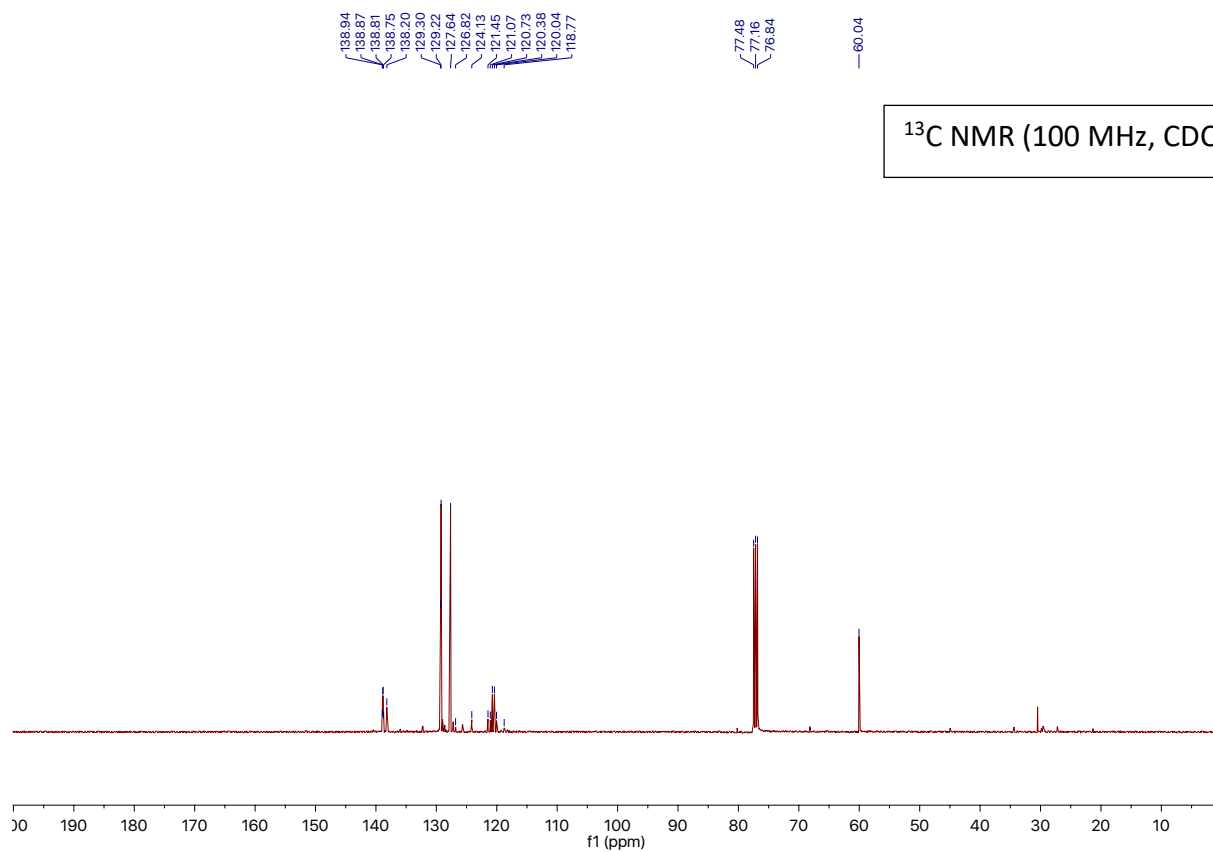

**(E)-(1-chloro-4,4,4-trifluoro-3-methylbut-2-en-1-yl)benzene (2k)**

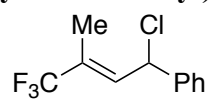

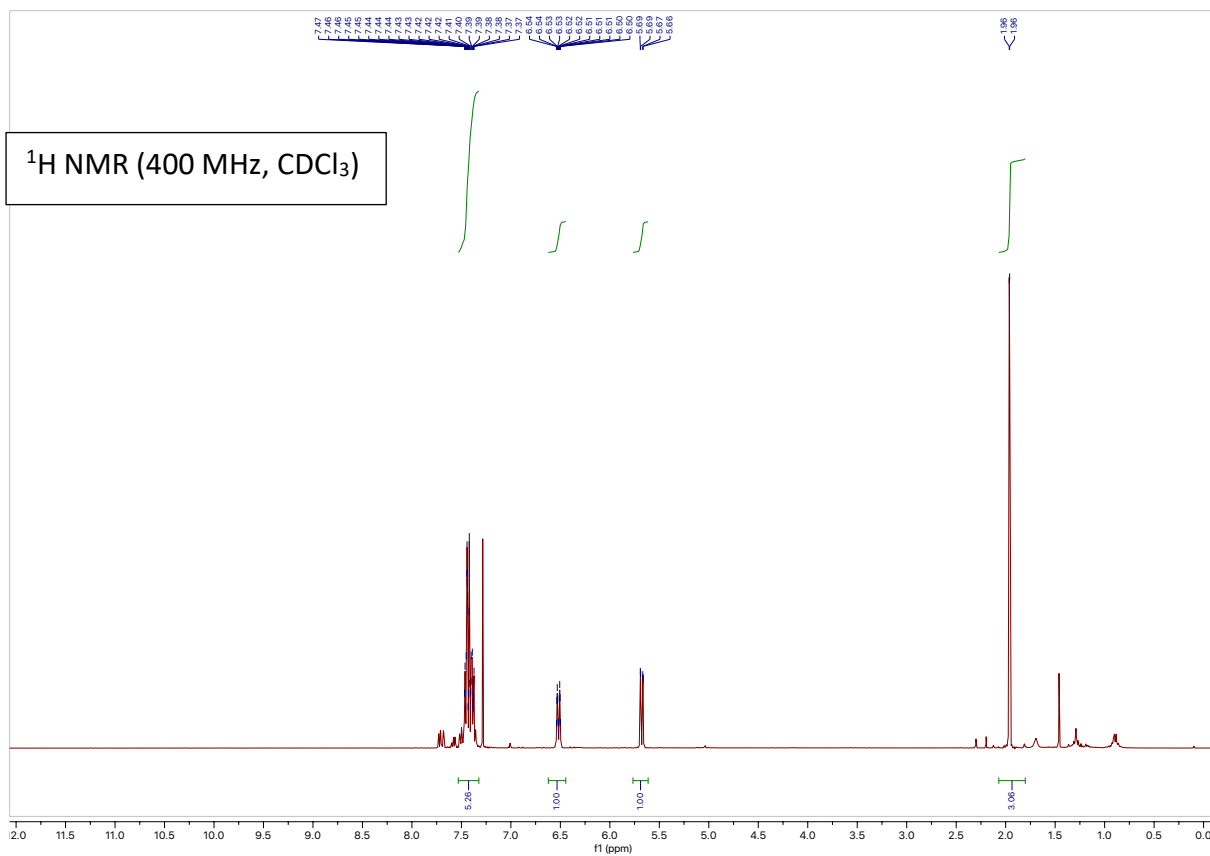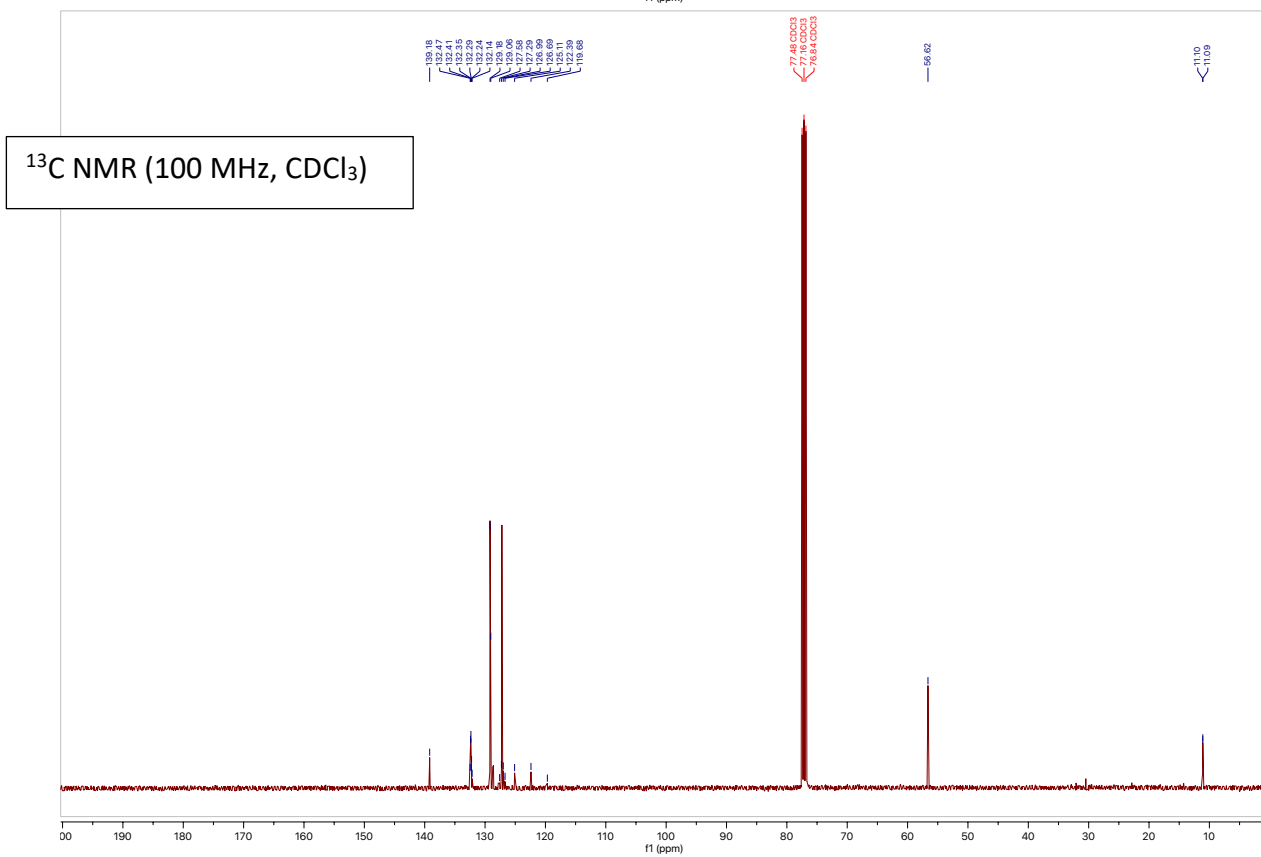

**(E)-1-chloro-4-(4-chloro-1,1,1-trifluoro-4-phenylbut-2-en-2-yl)benzene (2l)**

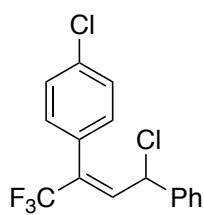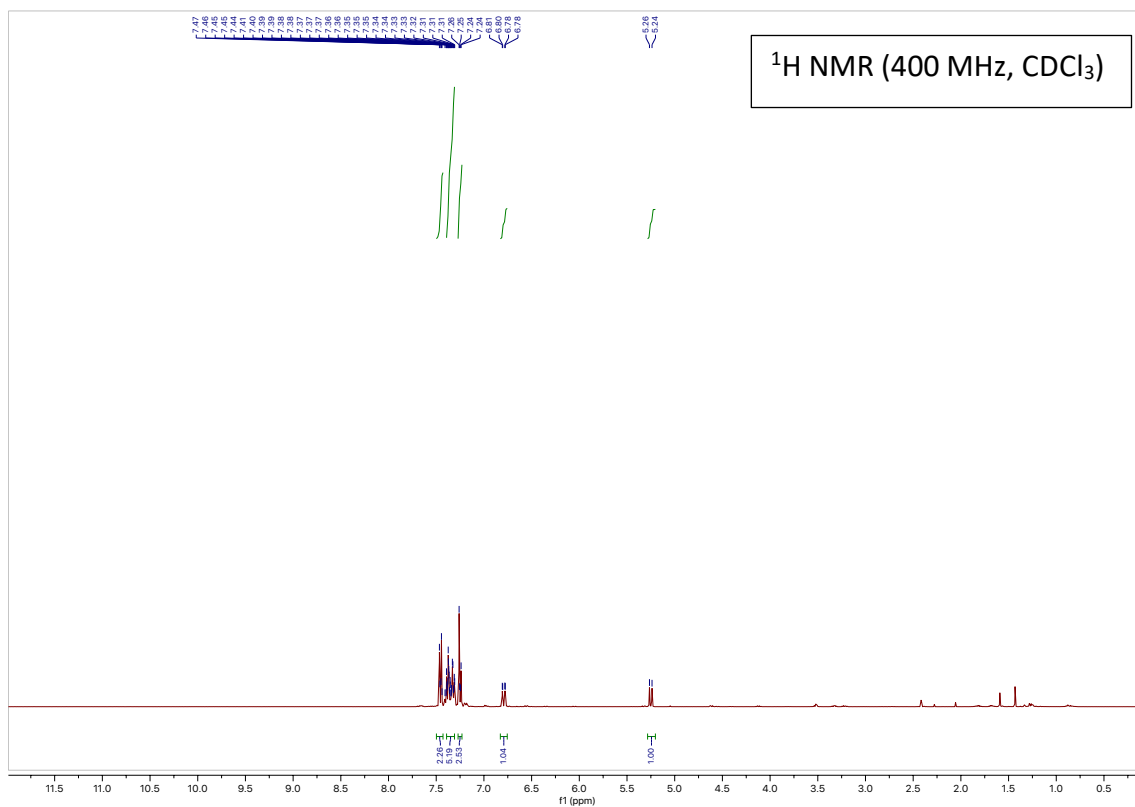

$^{13}\text{C}$  NMR (100 MHz,  $\text{CDCl}_3$ )

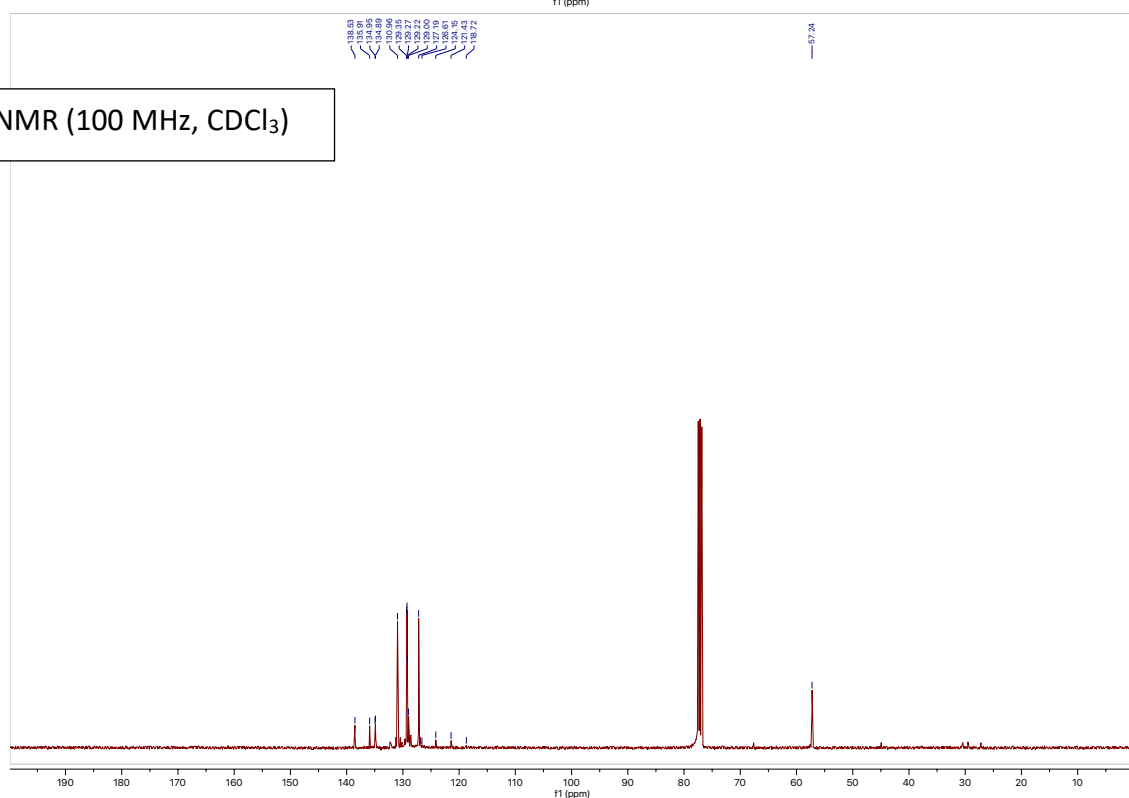

(E)-1-(4-Chloro-1,1,1-trifluoro-4-phenylbut-2-en-2-yl)-4-(trifluoromethyl)benzene (2m)

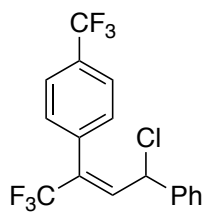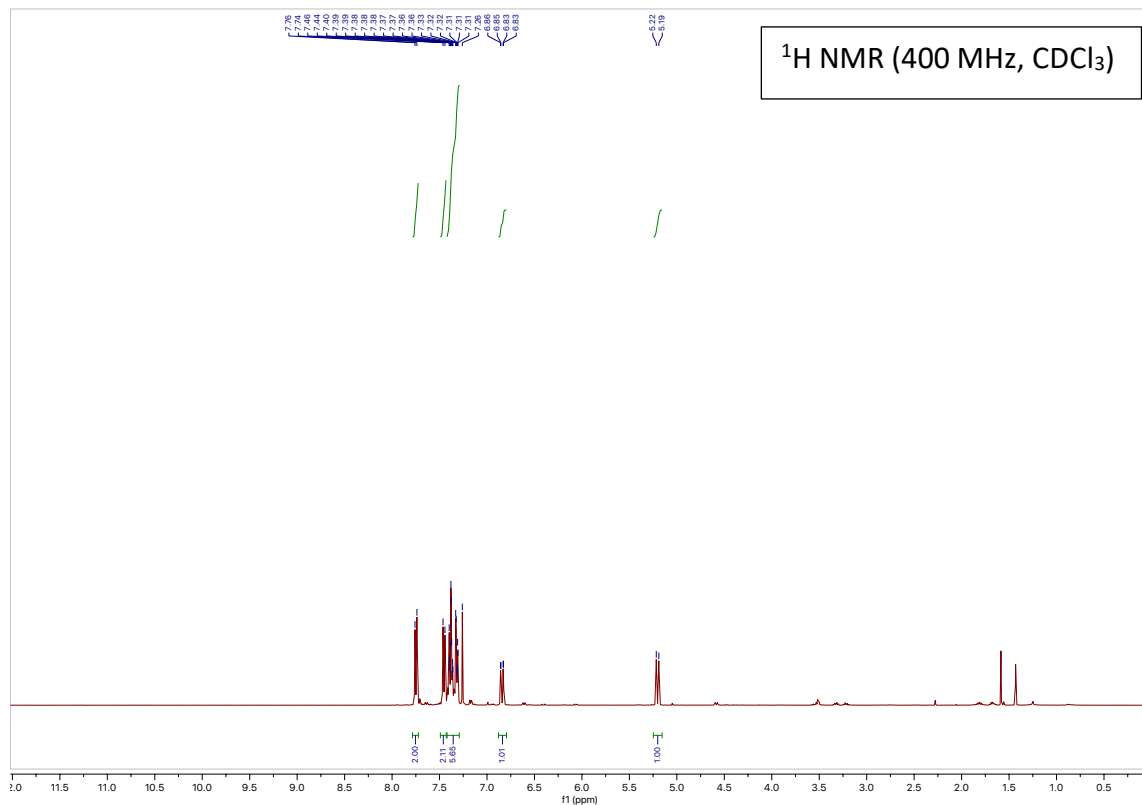

**<sup>13</sup>C NMR (100 MHz, CDCl<sub>3</sub>)**

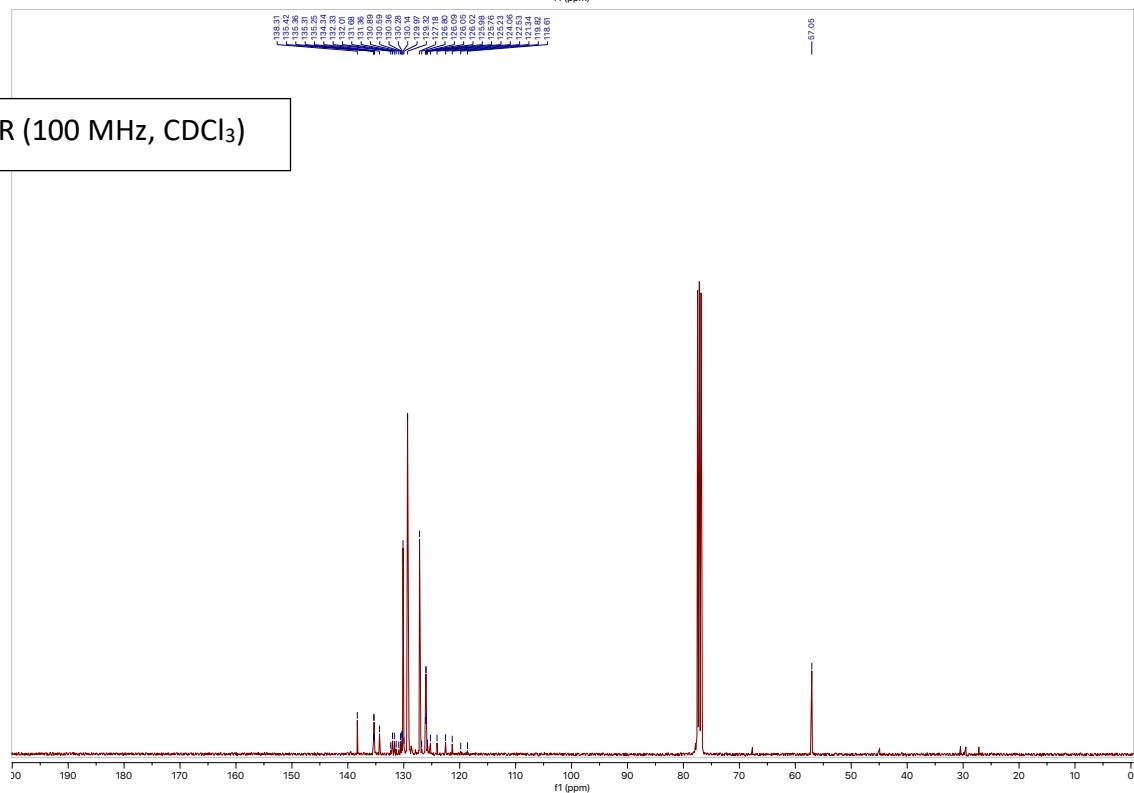

**(E)-3-chloro-1-(phenylsulfonyl)prop-1-ene-1,3-diyl dibenzene ((E)-2n)**



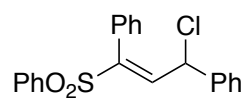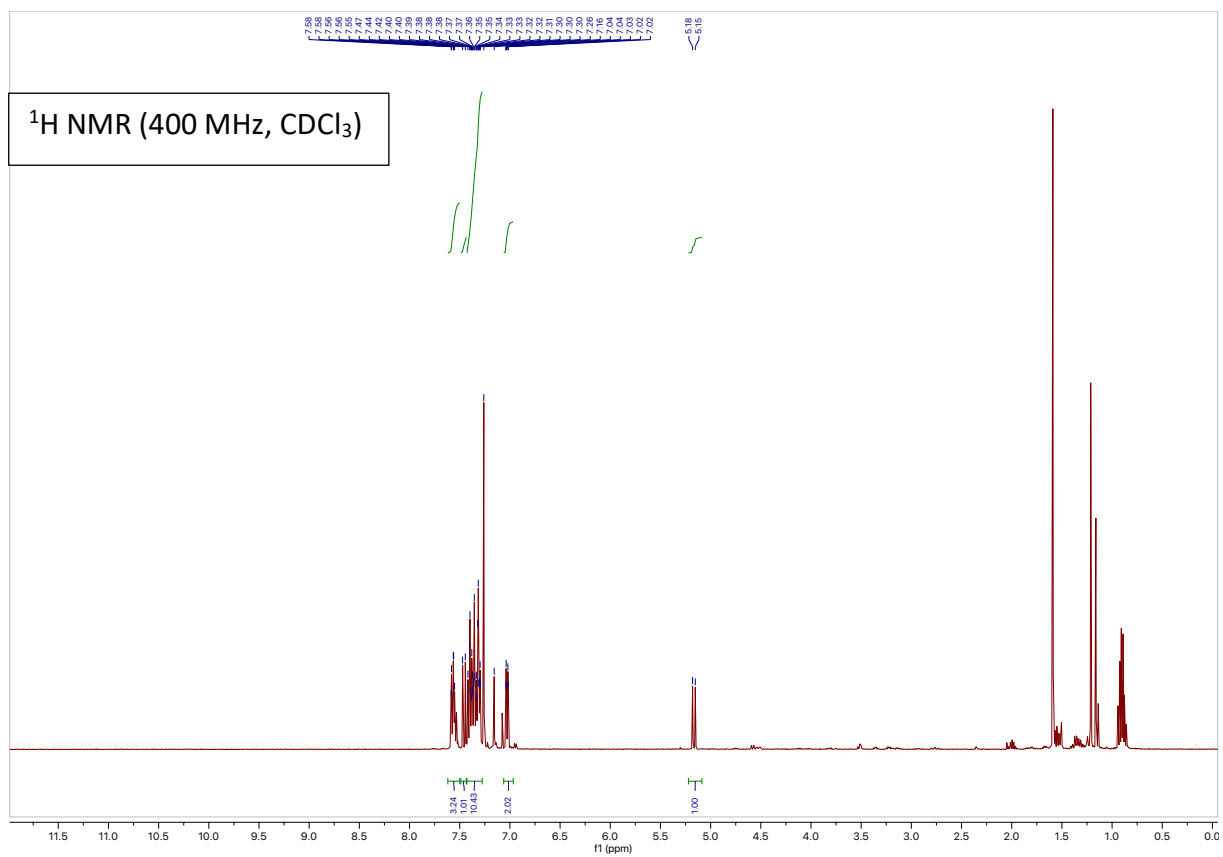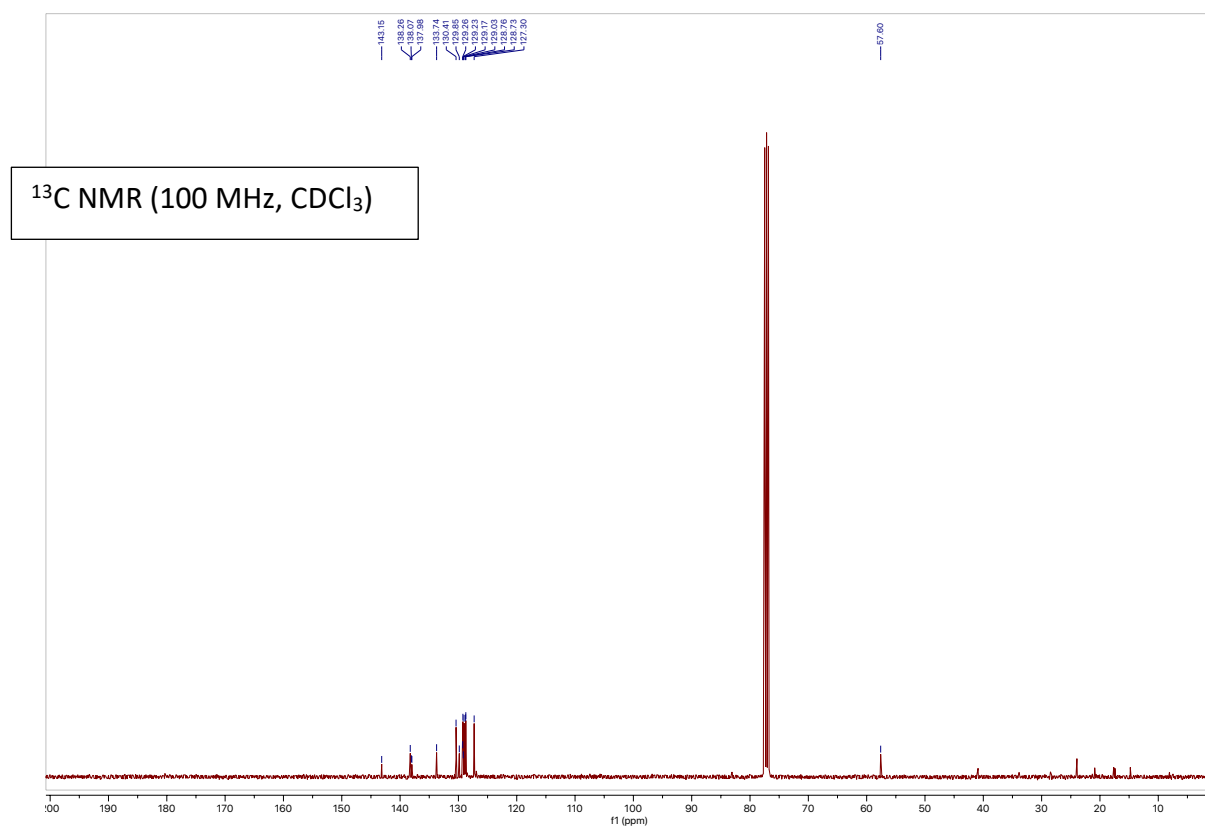

**(Z)-3-chloro-1-(phenylsulfonyl)prop-1-ene-1,3-diyl dibenzene ((Z)-2n)**

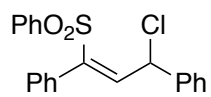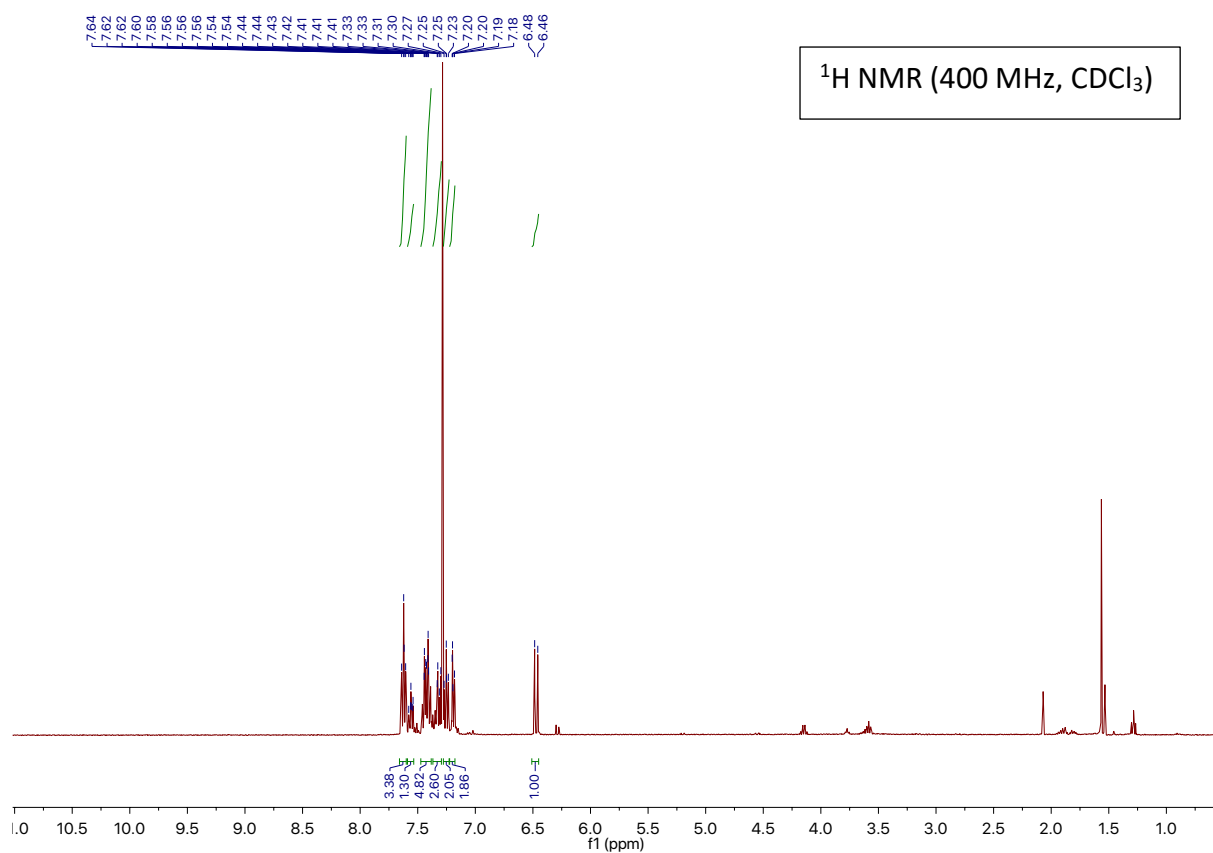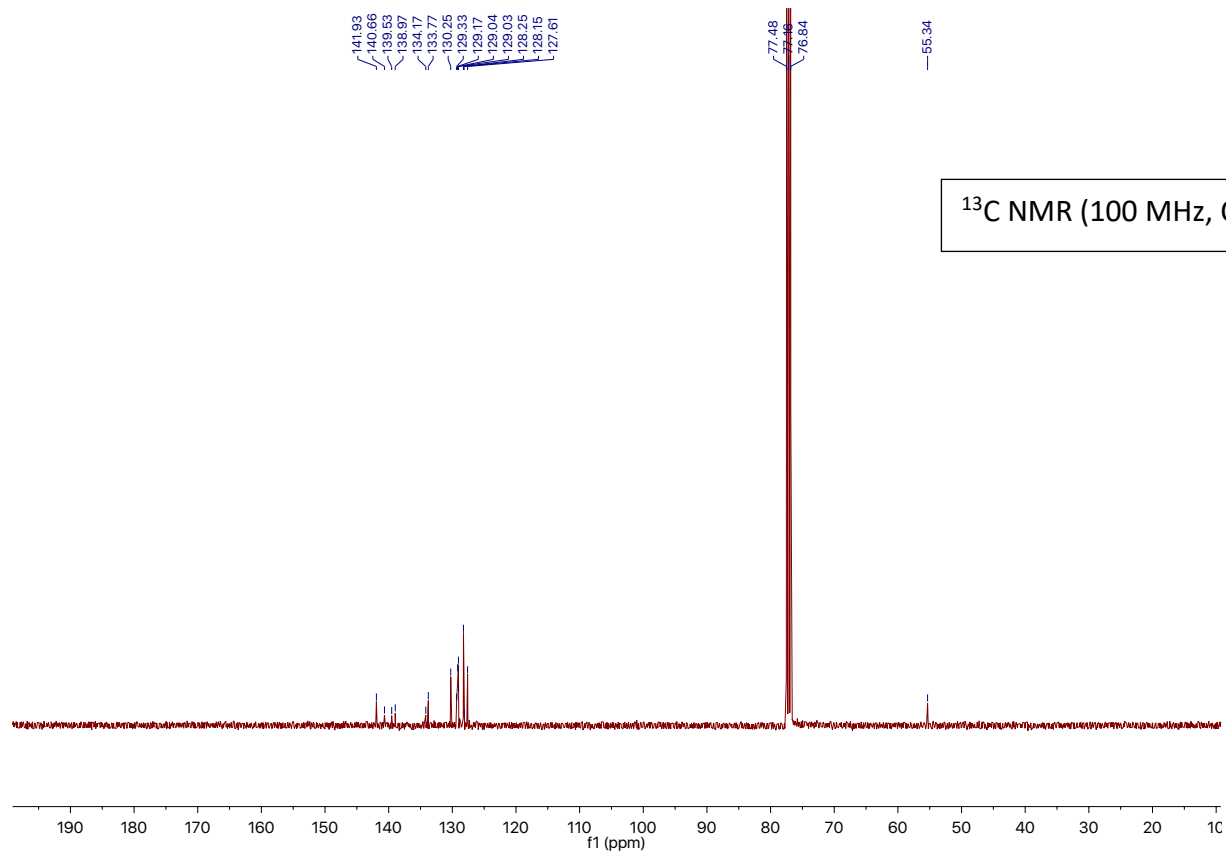

**(Z)-1-chloro-2,4,4,4-tetrafluorobut-2-ene-1,3-diyl)dibenzene (2o)**

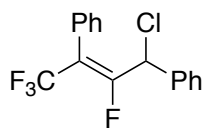

$^1\text{H NMR}$  (400 MHz,  $\text{CDCl}_3$ )

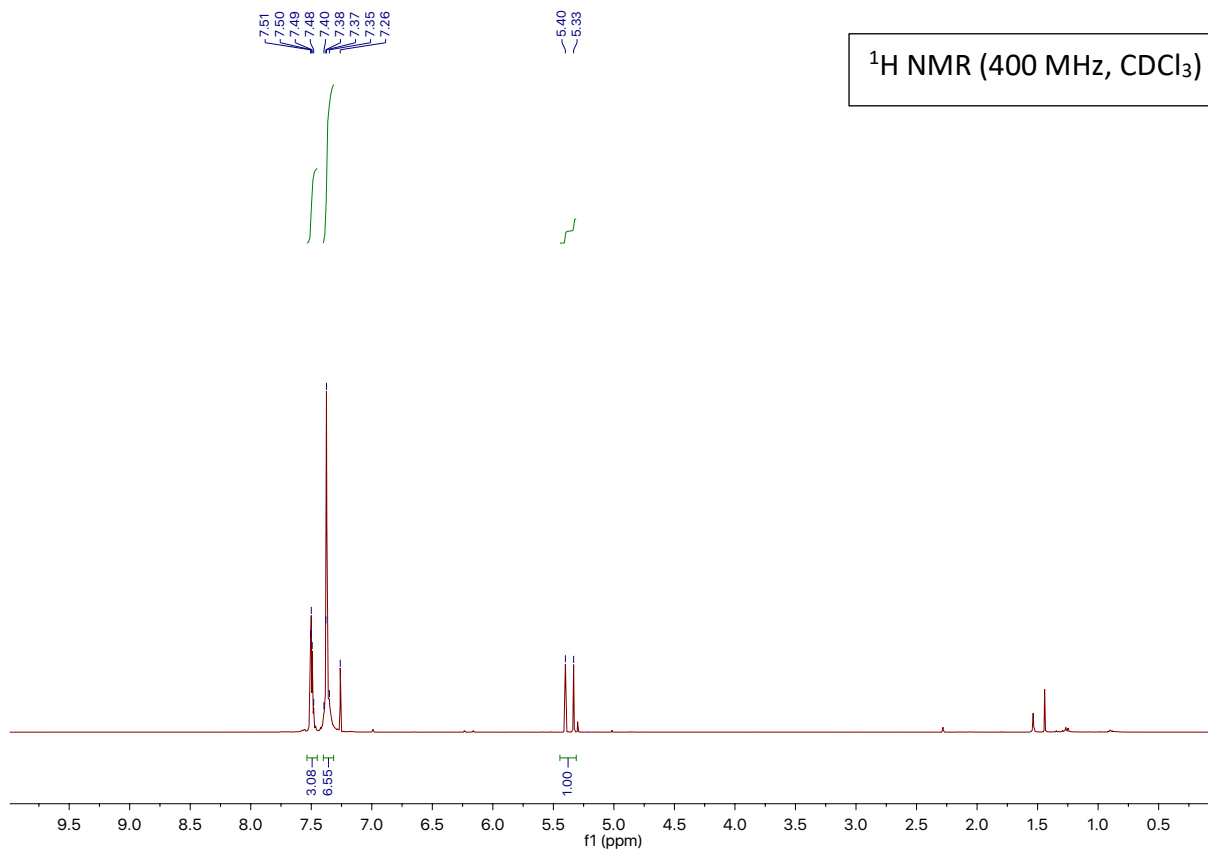

$^{13}\text{C NMR}$  (100 MHz,  $\text{CDCl}_3$ )

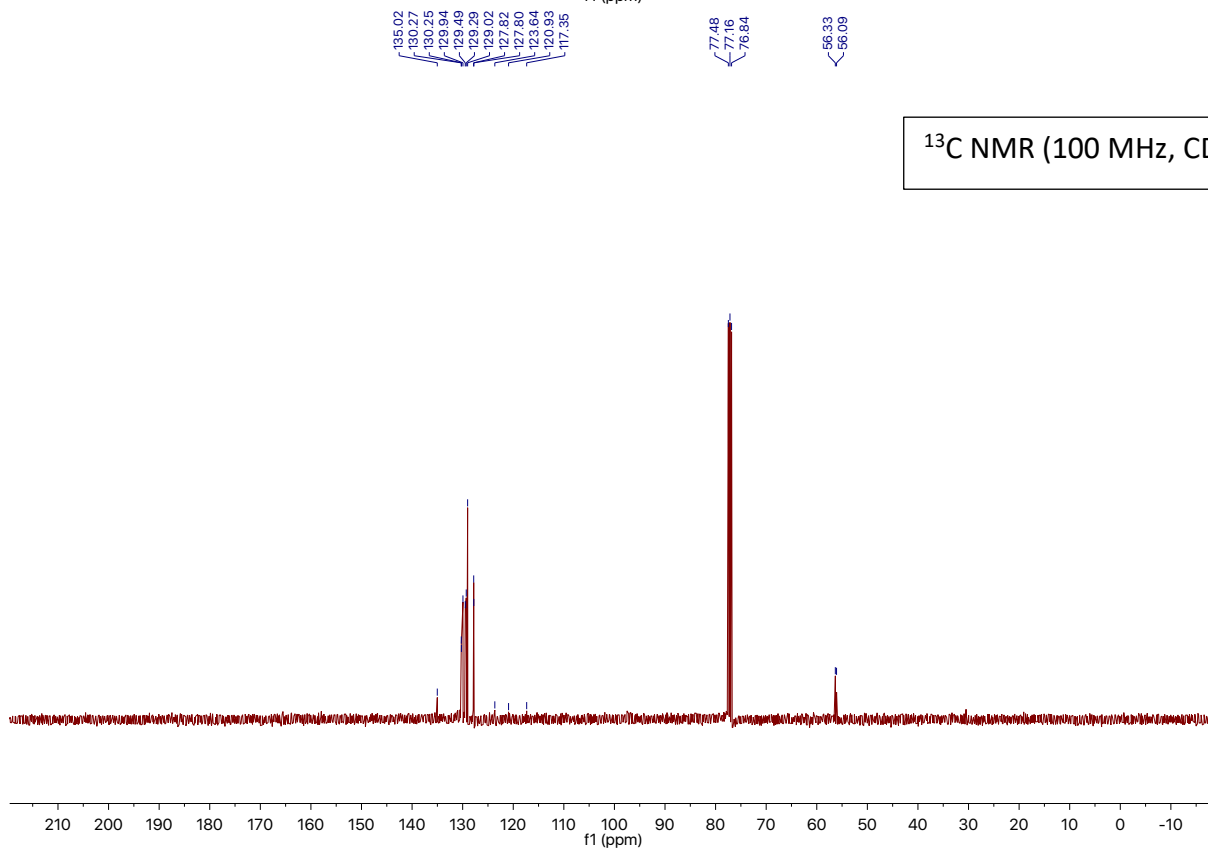

**(E)-(1-bromo-4,4,4-trifluorobut-2-ene-1,3-diyl)dibenzene (3a)**

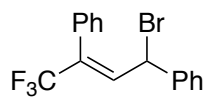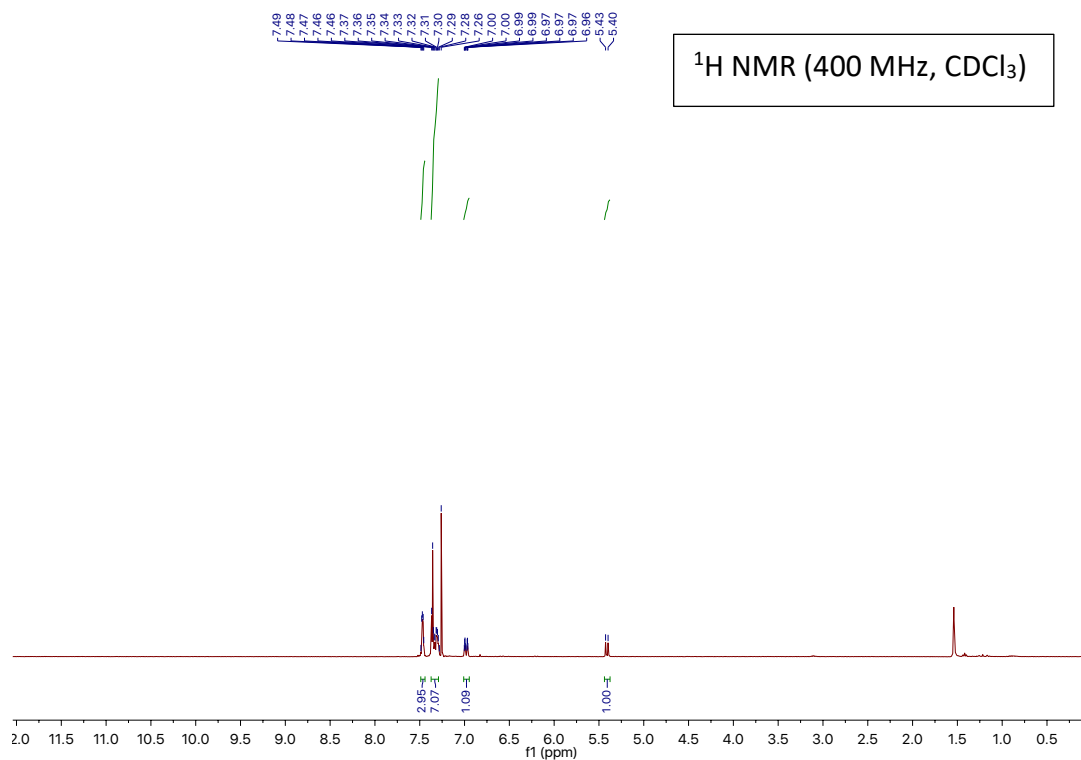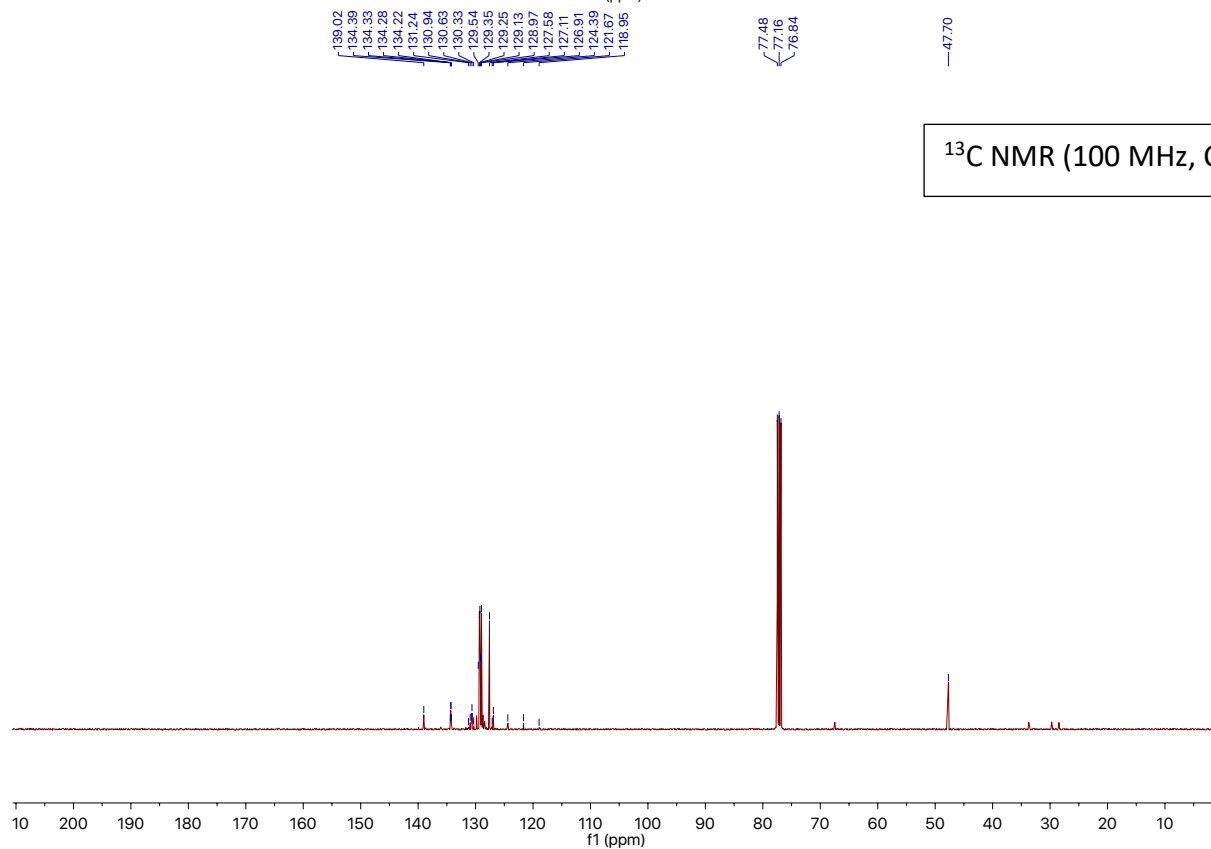

**(E)-1-(1-bromo-4,4,4-trifluoro-3-phenylbut-2-en-1-yl)-4-(trifluoromethyl)benzene (3b)**

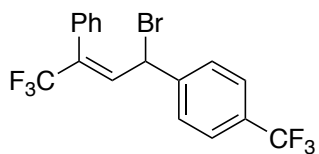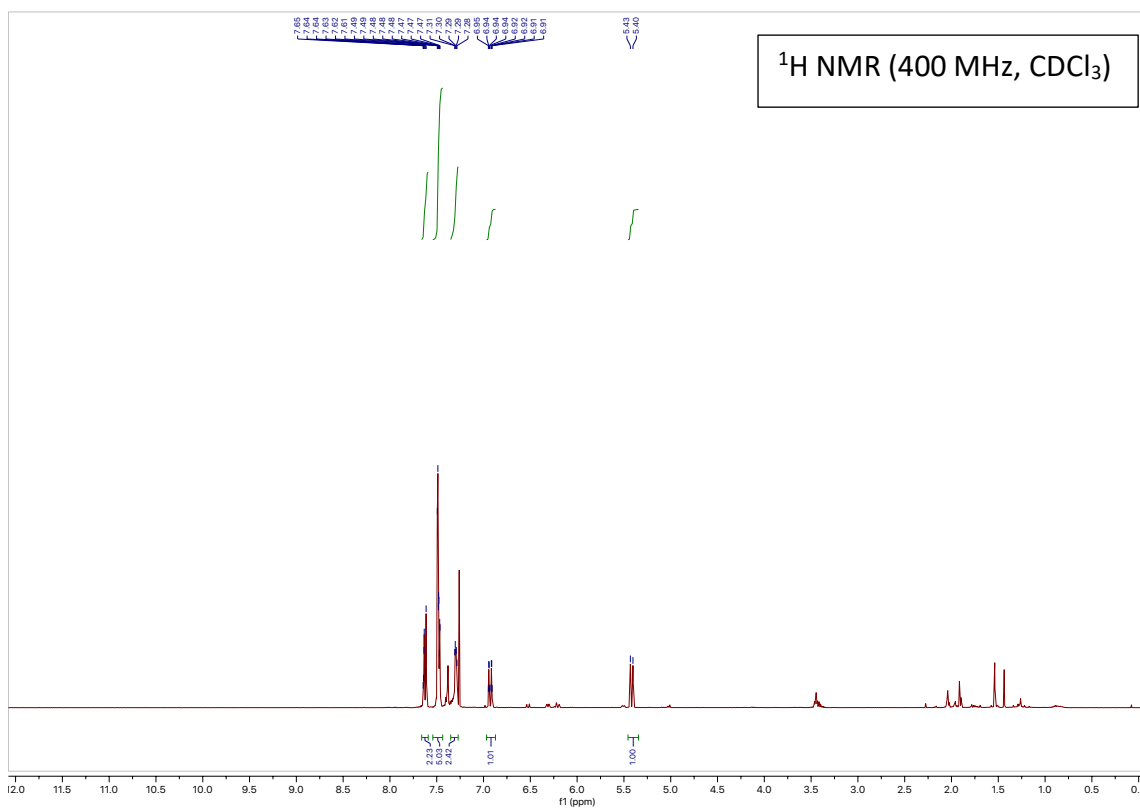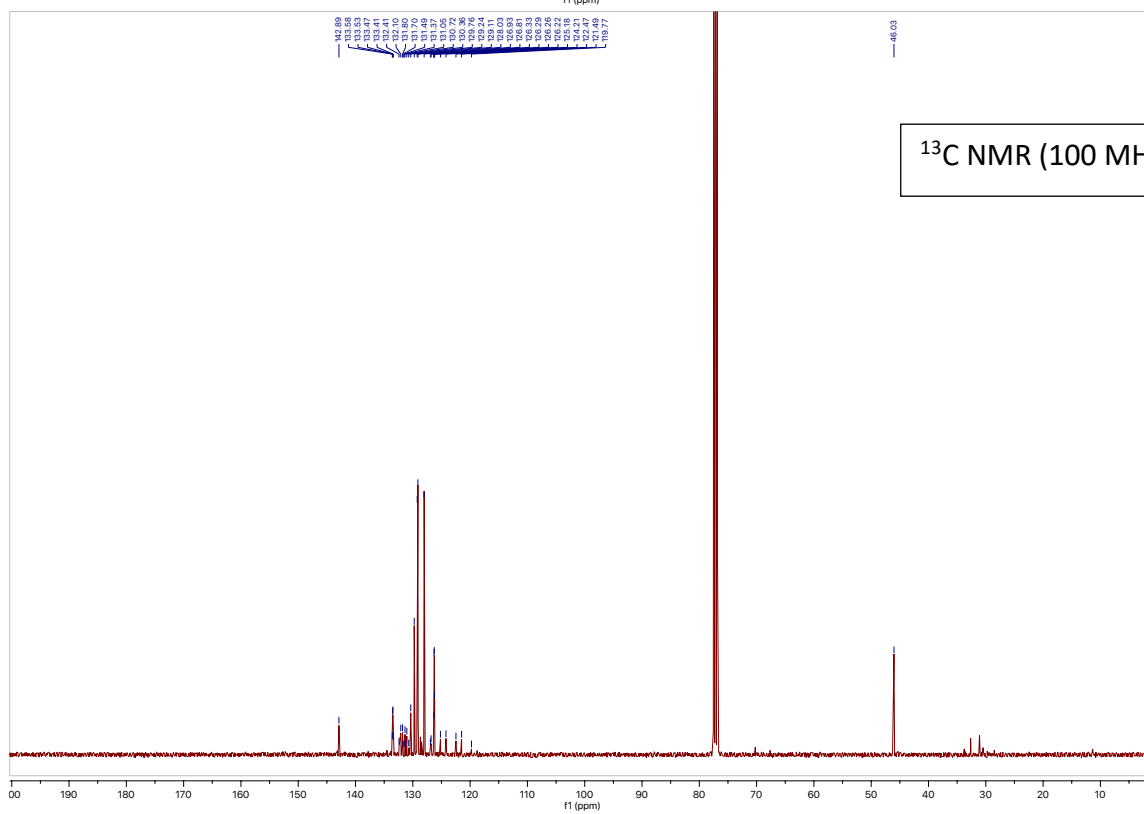

**(E)-3-bromo-1-(phenylsulfonyl)prop-1-ene-1,3-diyl)dibenzene (3c)**

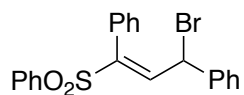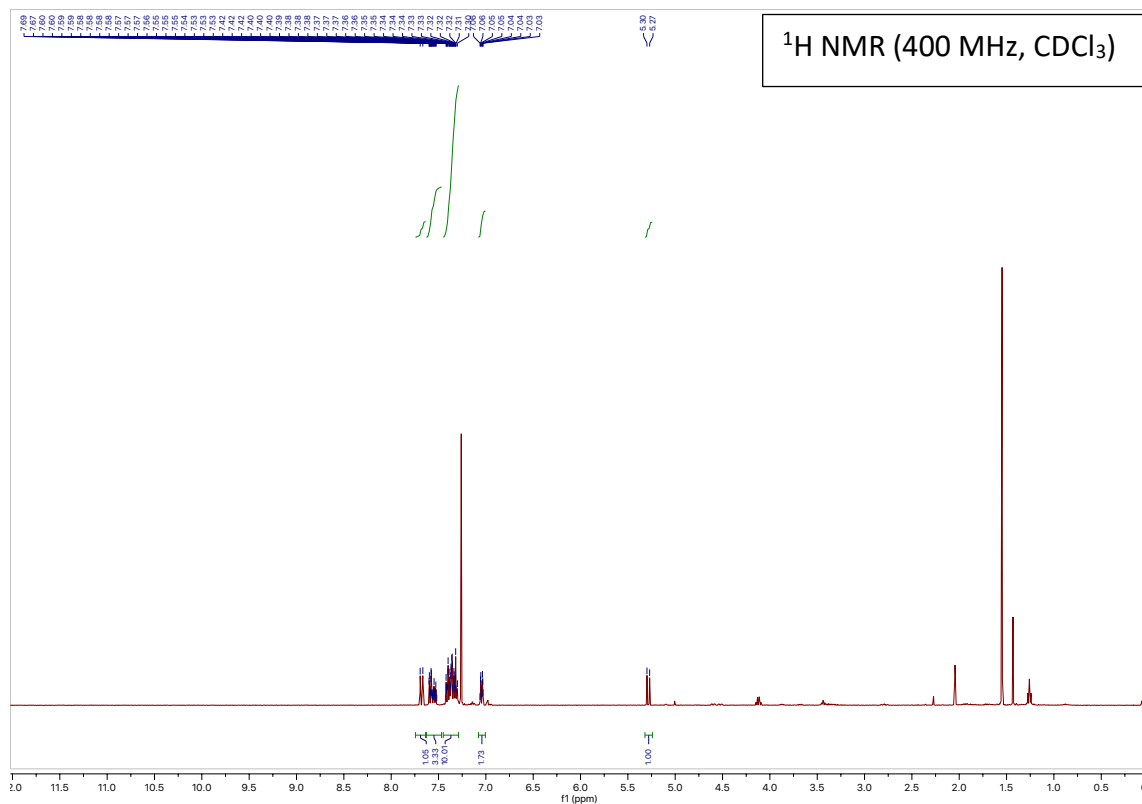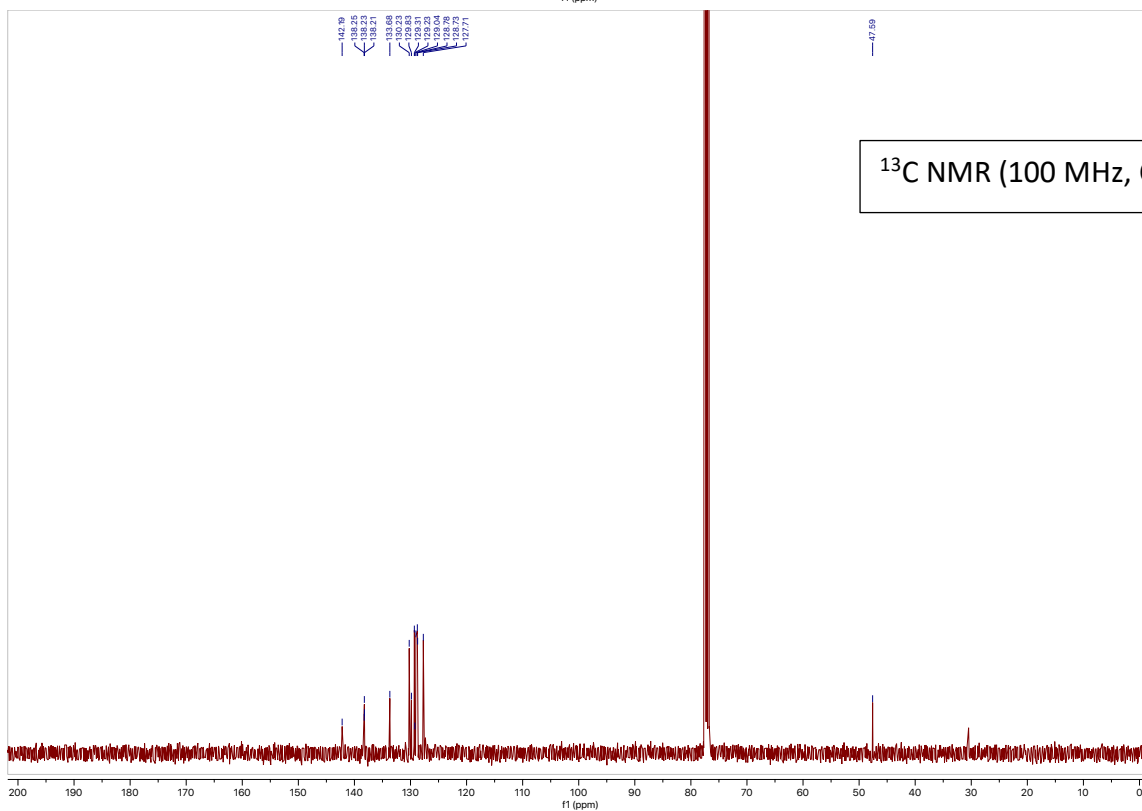

**(E)-1-fluoro-4,4,4-trifluorobut-2-ene-1,3-diyl)dibenzene (4a)**

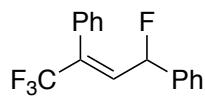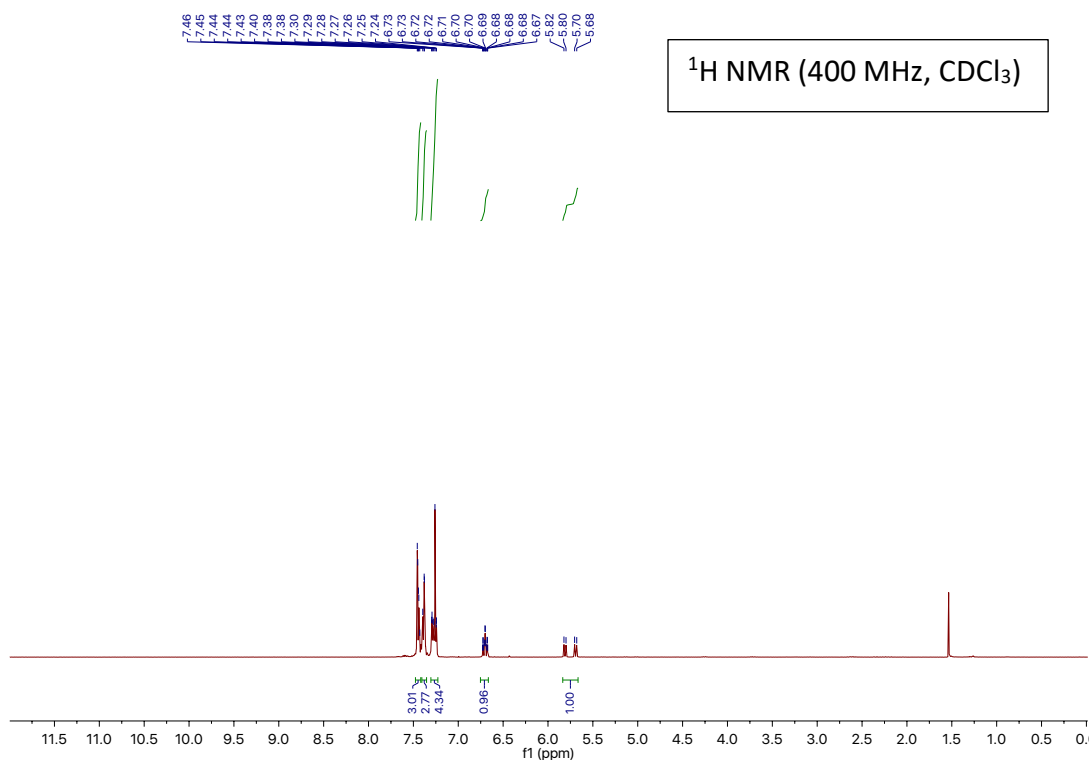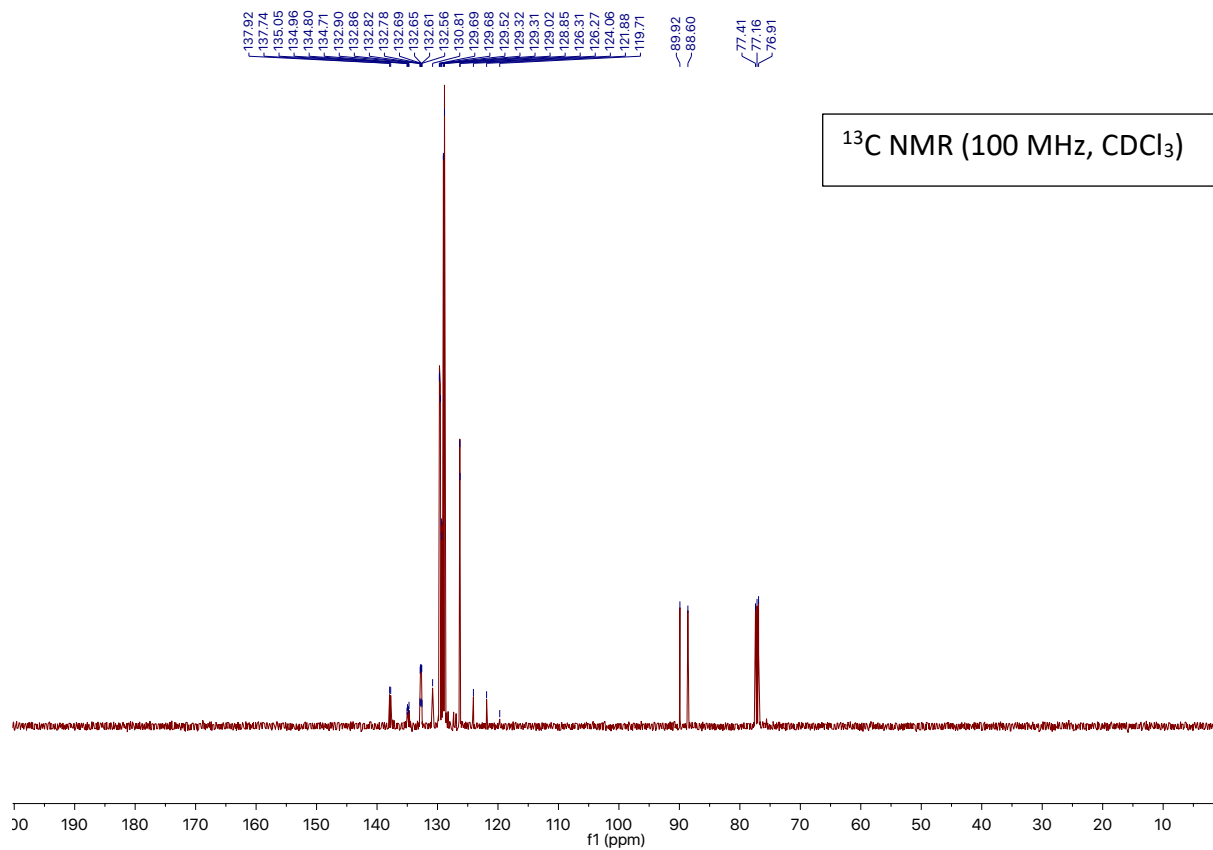

**(E)-1-(1,4,4-tetrafluoro-3-phenylbut-2-en-1-yl)-4-(trifluoromethyl)benzene (4b)**

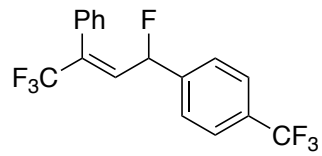

$^1\text{H}$  NMR (400 MHz,  $\text{CDCl}_3$ )

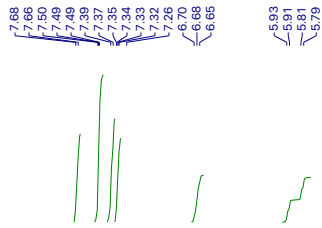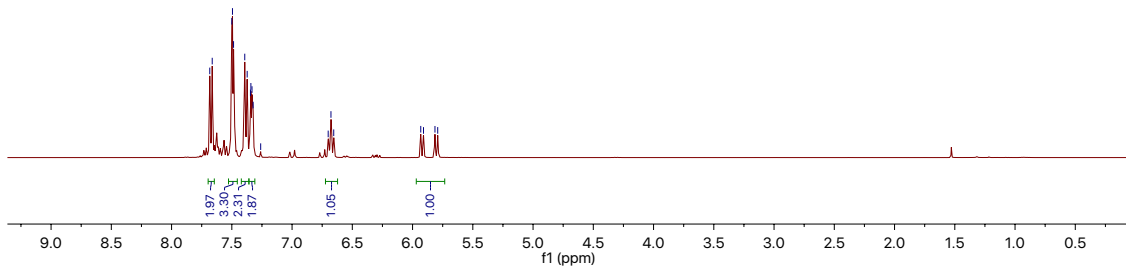

$^{13}\text{C}$  NMR (100 MHz,  $\text{CDCl}_3$ )

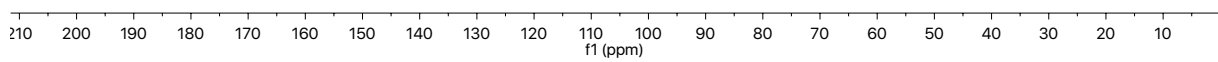

**(E)-2-(1,4,4,4-tetrafluoro-3-phenylbut-2-en-1-yl)naphthalene (4c)**



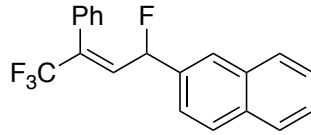

7.90  
7.88  
7.87  
7.87  
7.86  
7.86  
7.85  
7.84  
7.84  
7.83  
7.83  
7.82  
7.82  
7.81  
7.81  
7.80  
7.78  
7.78  
7.74  
7.74  
7.73  
7.73  
7.72  
7.72  
7.69  
7.69  
7.68  
7.68  
7.62  
7.62  
7.62  
7.62  
7.60  
7.60  
7.59  
7.59  
7.56  
7.56  
7.53

<sup>1</sup>H NMR (400 MHz, CDCl<sub>3</sub>)

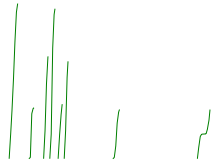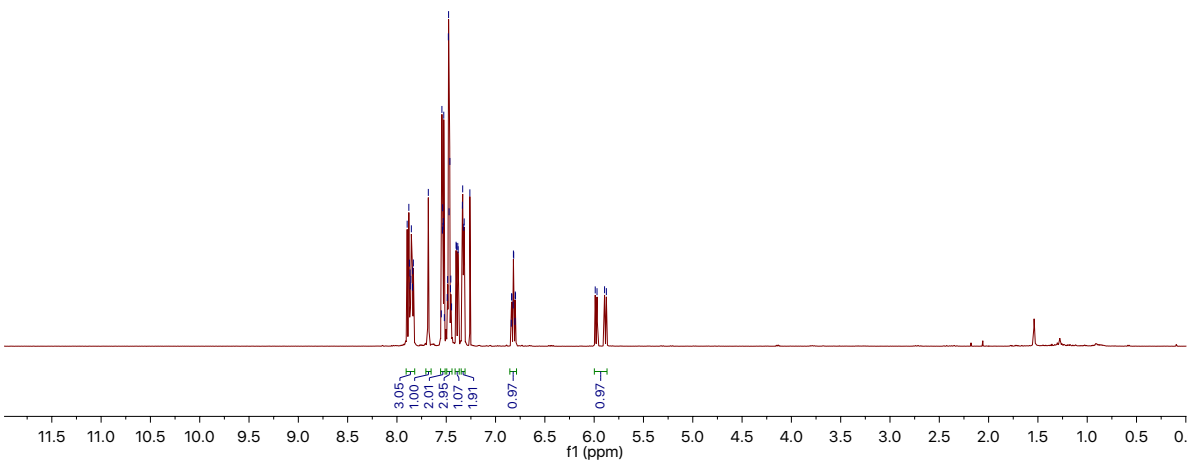

<sup>13</sup>C NMR (100 MHz, CDCl<sub>3</sub>)

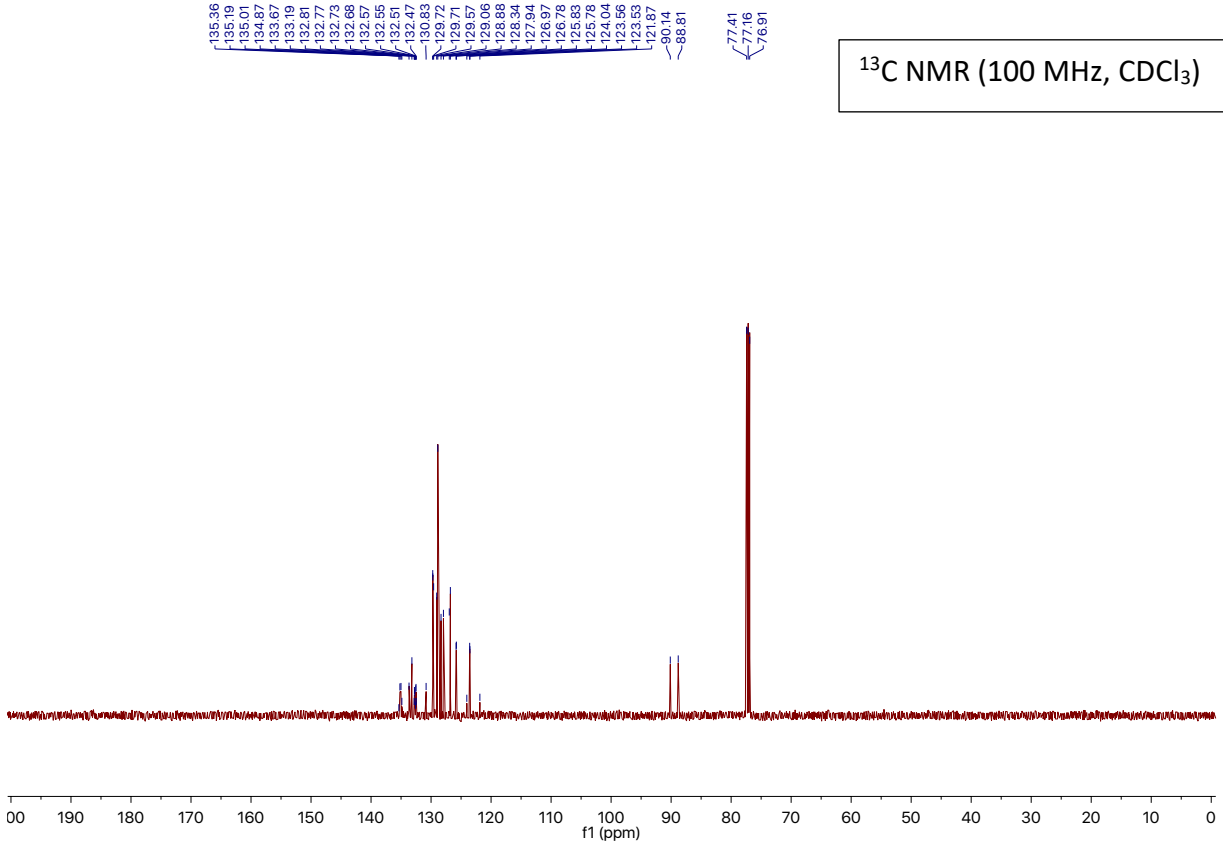

# $^1\text{H}$ NMR, $^{13}\text{C}$ NMR and $^{19}\text{F}$ NMR of vinyl halides 5a-5n, 6a-6c and 7a-7c

## (Z)-(1-chloro-4,4,4-trifluorobut-1-ene-1,3-diyl)dibenzene (5a)

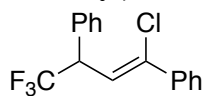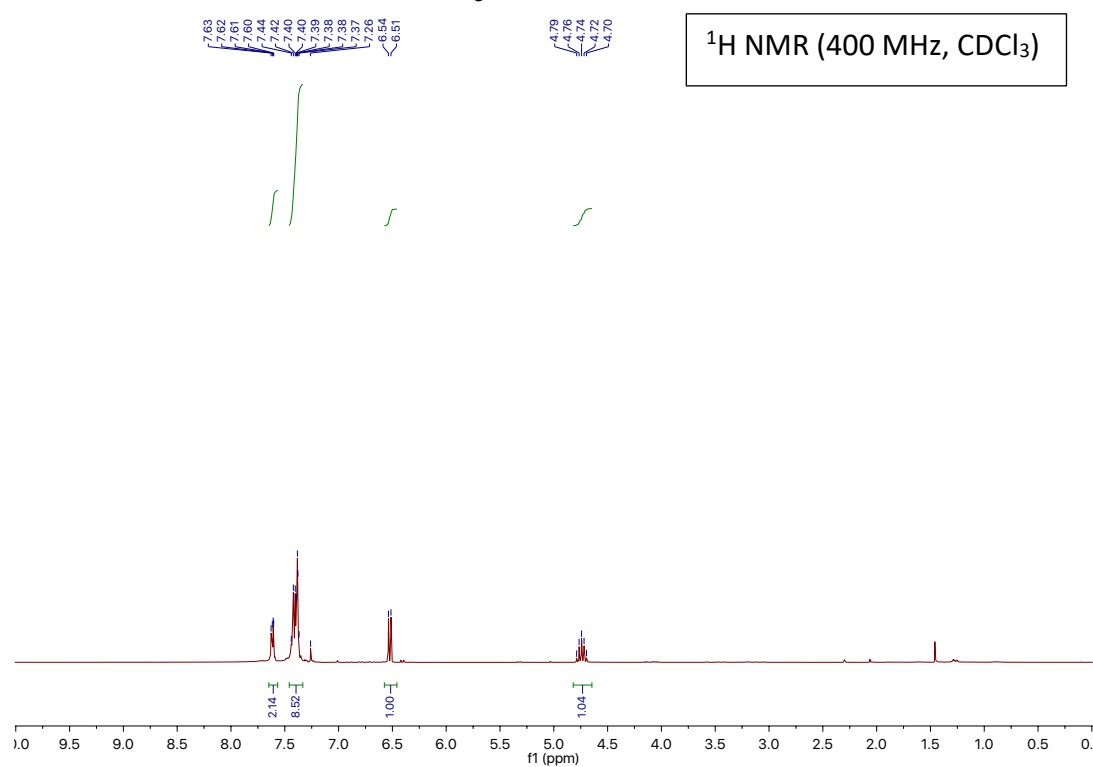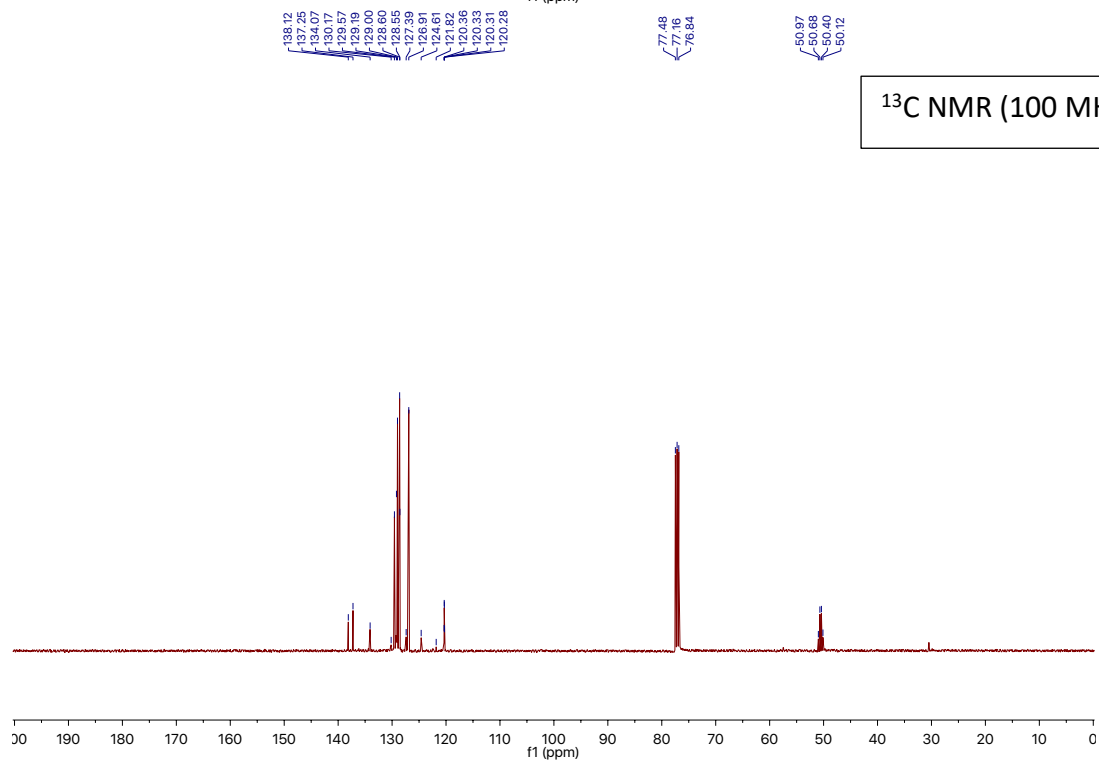

**(Z)-1-bromo-4-(1-chloro-4,4,4-trifluoro-3-phenylbut-1-en-1-yl)benzene (5b)**

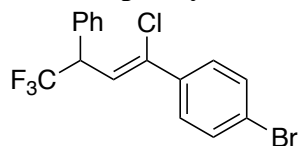

**<sup>1</sup>H NMR (400 MHz, CDCl<sub>3</sub>)**

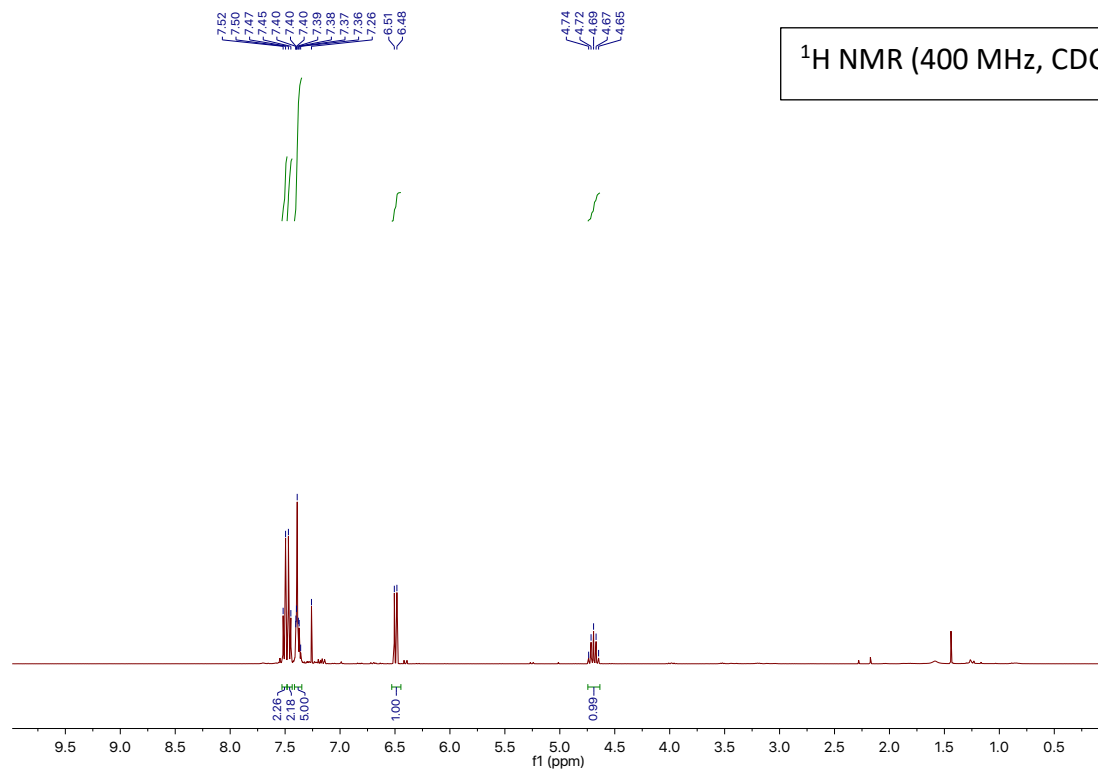

**<sup>13</sup>C NMR (100 MHz, CDCl<sub>3</sub>)**

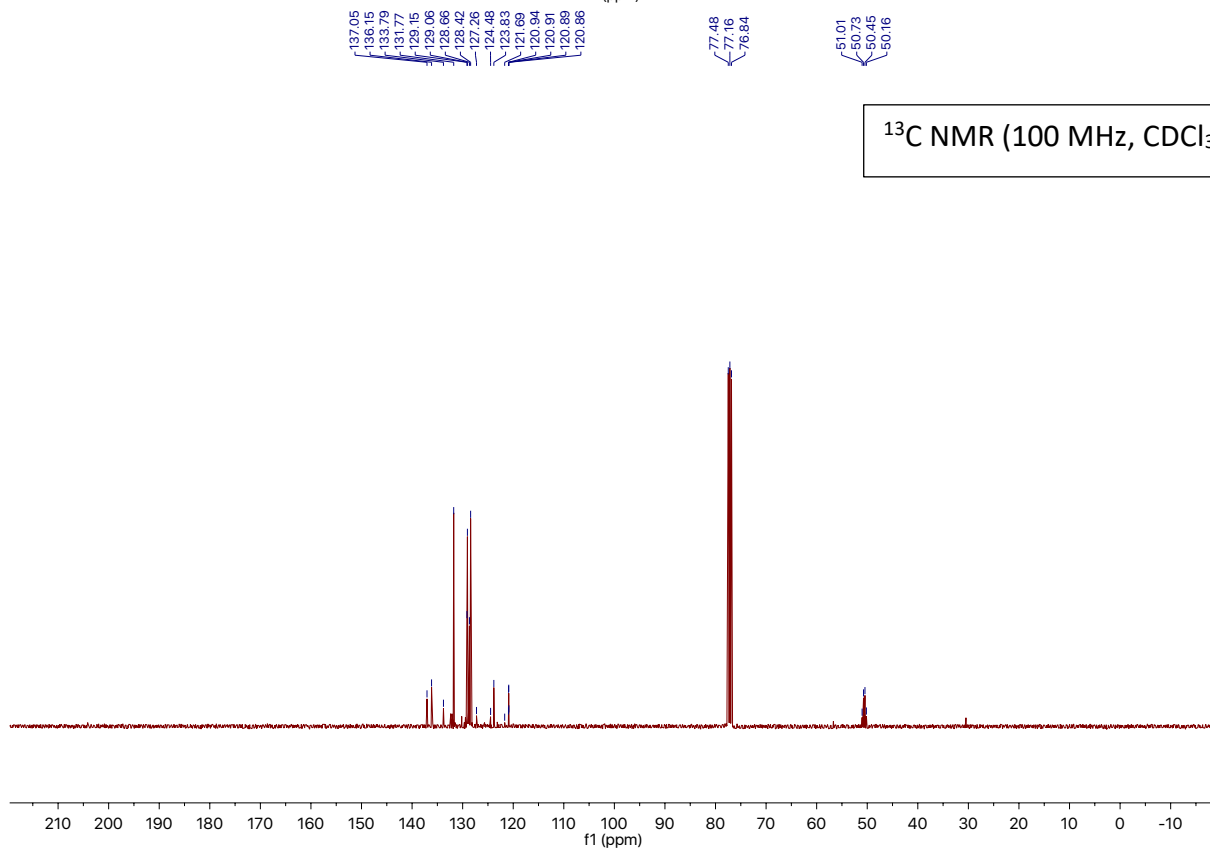

**(Z)-1-(1-chloro-4,4,4-trifluoro-3-phenylbut-1-en-1-yl)-4-(trifluoromethyl)benzene (5c)**

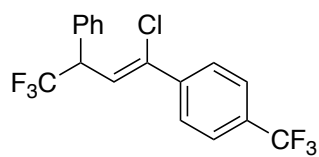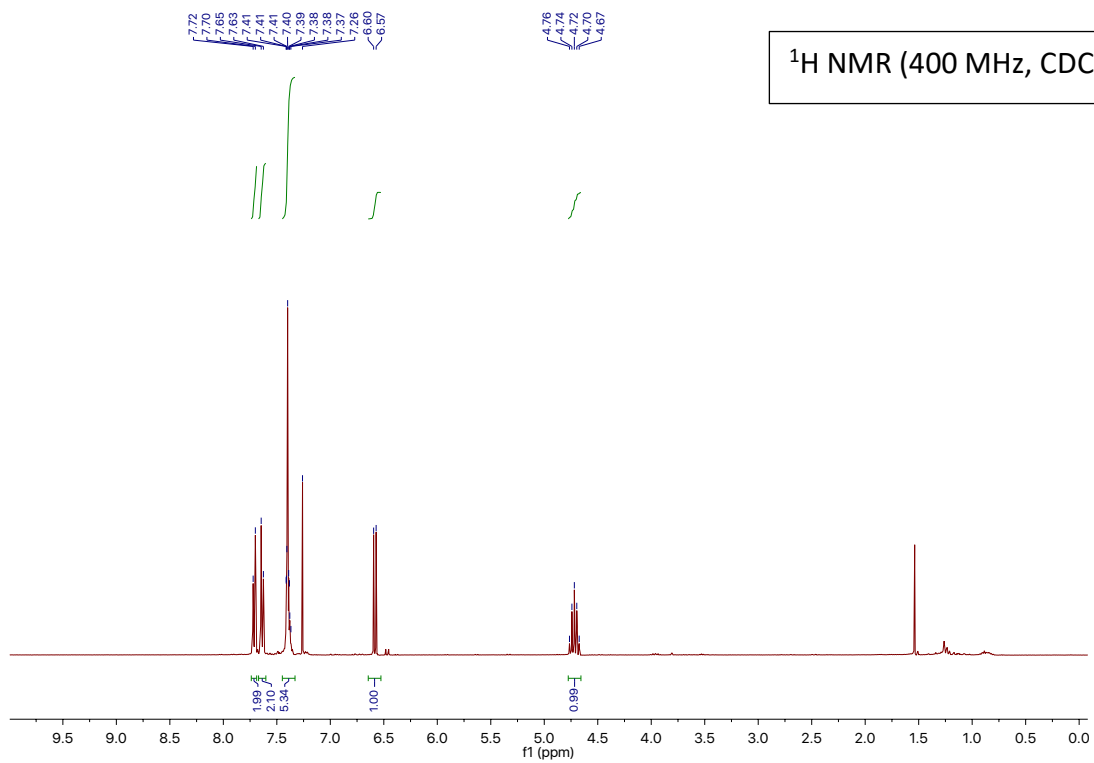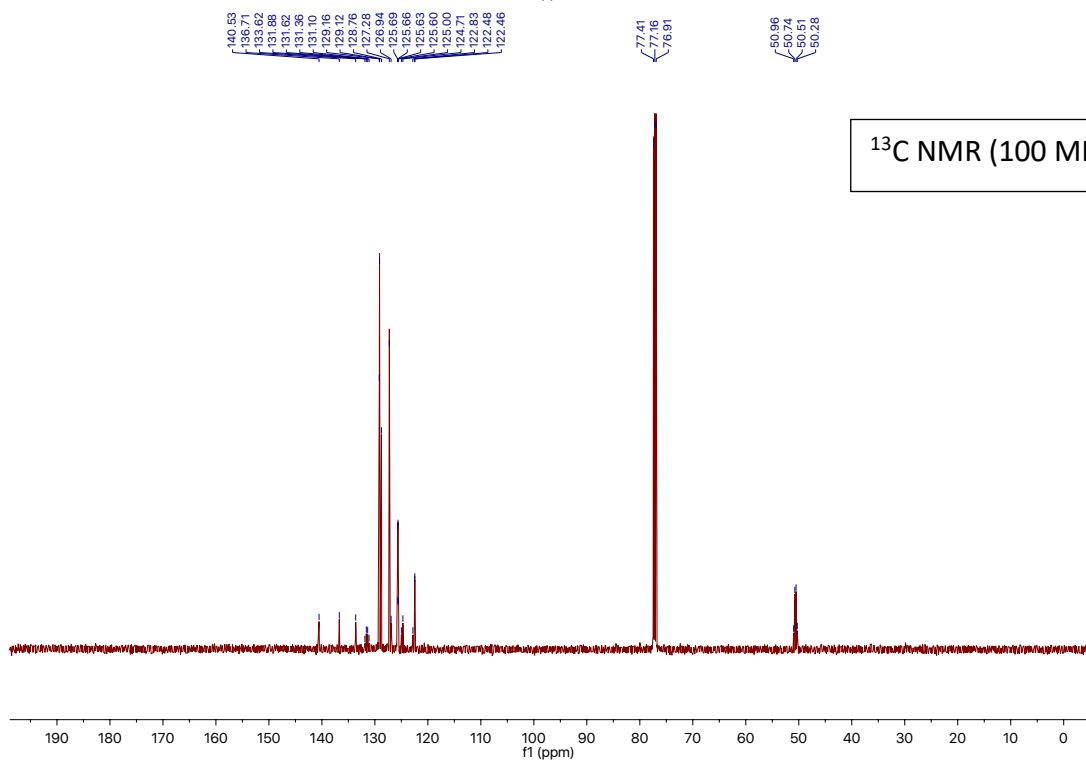

**(Z)-4-(1-chloro-4,4,4-trifluoro-3-phenylbut-1-en-1-yl)benzonitrile (5d)**

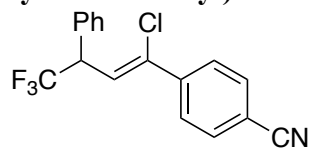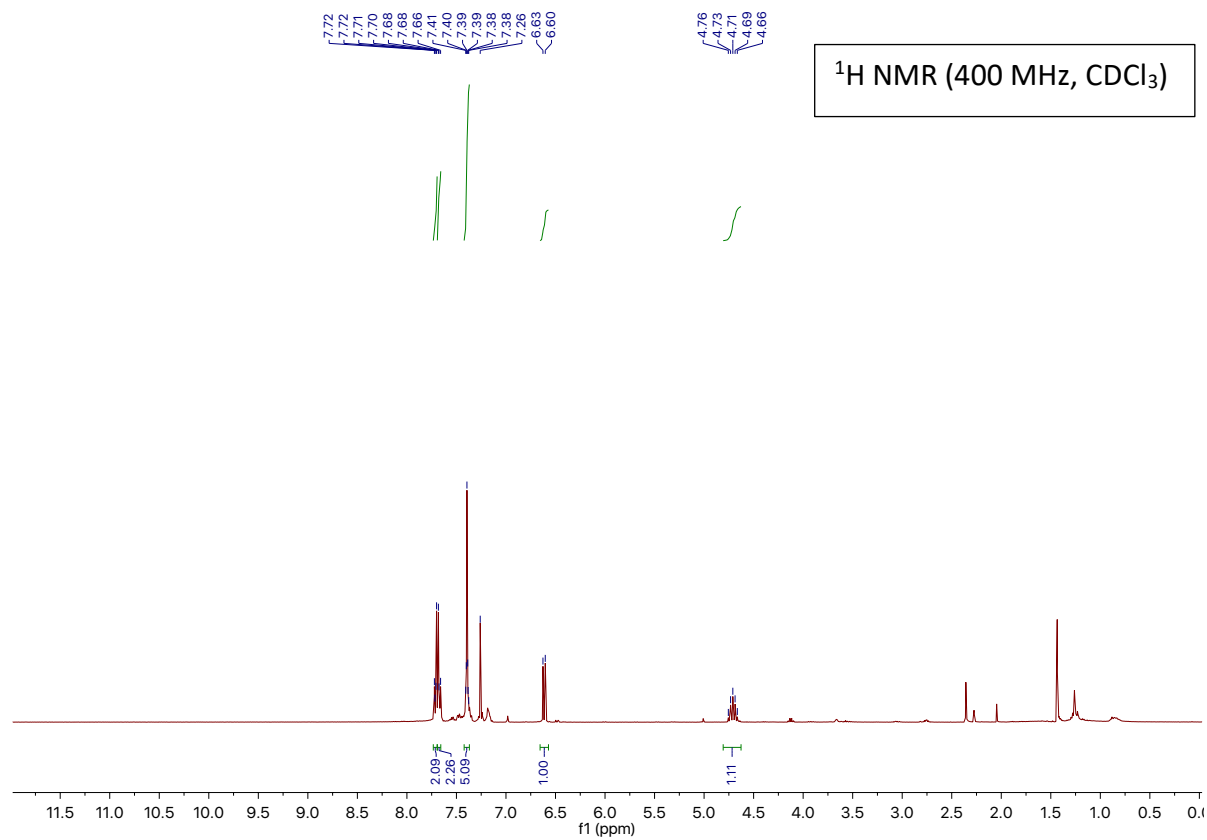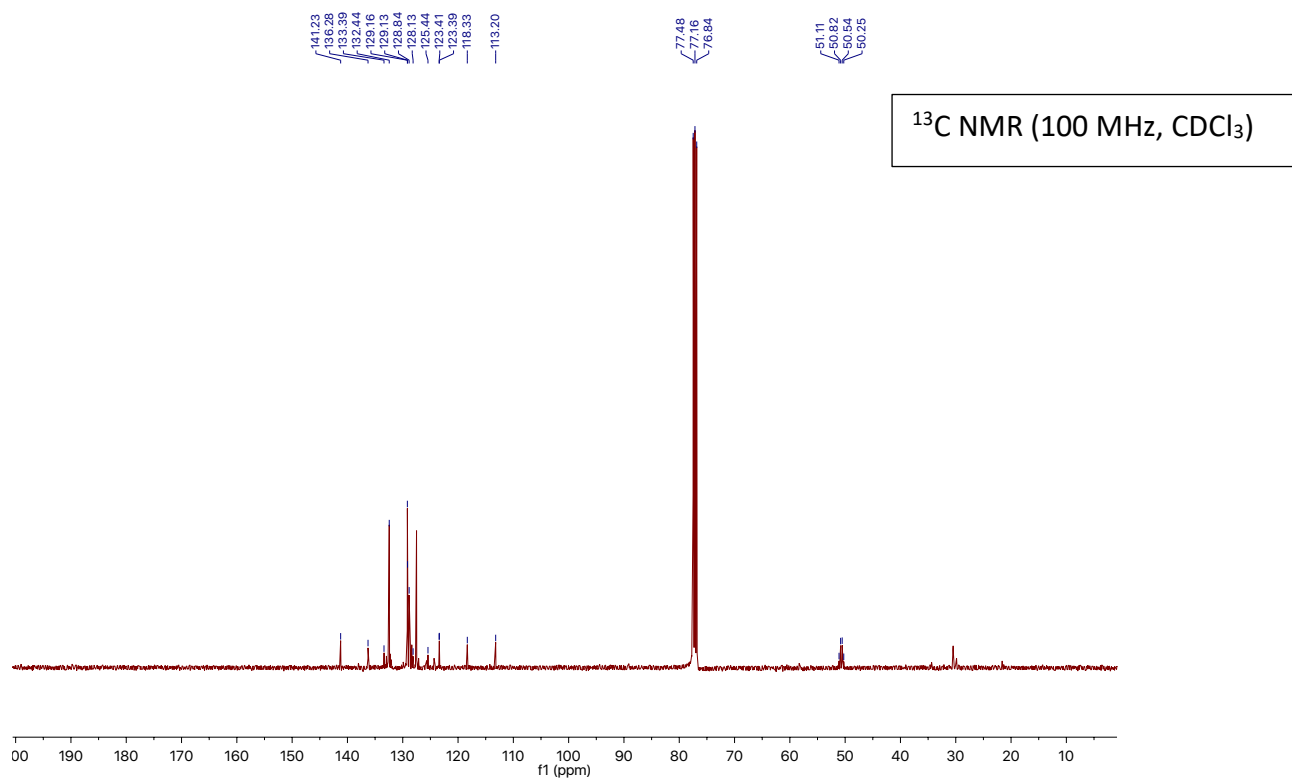

**(Z)-1-(1-chloro-4,4,4-trifluoro-3-phenylbut-1-en-1-yl)-4-(methylsulfonyl)benzene (5e)**

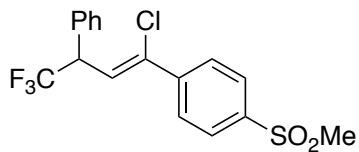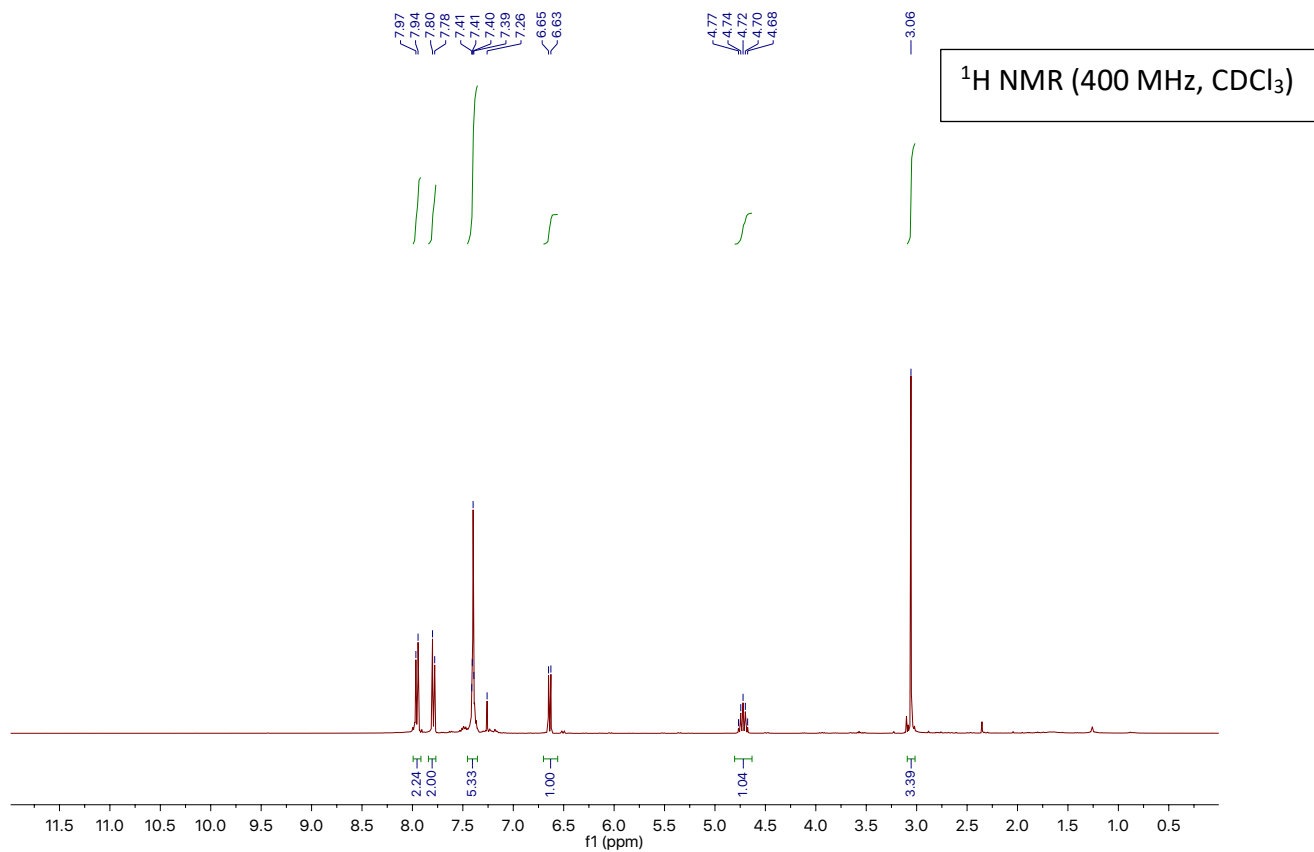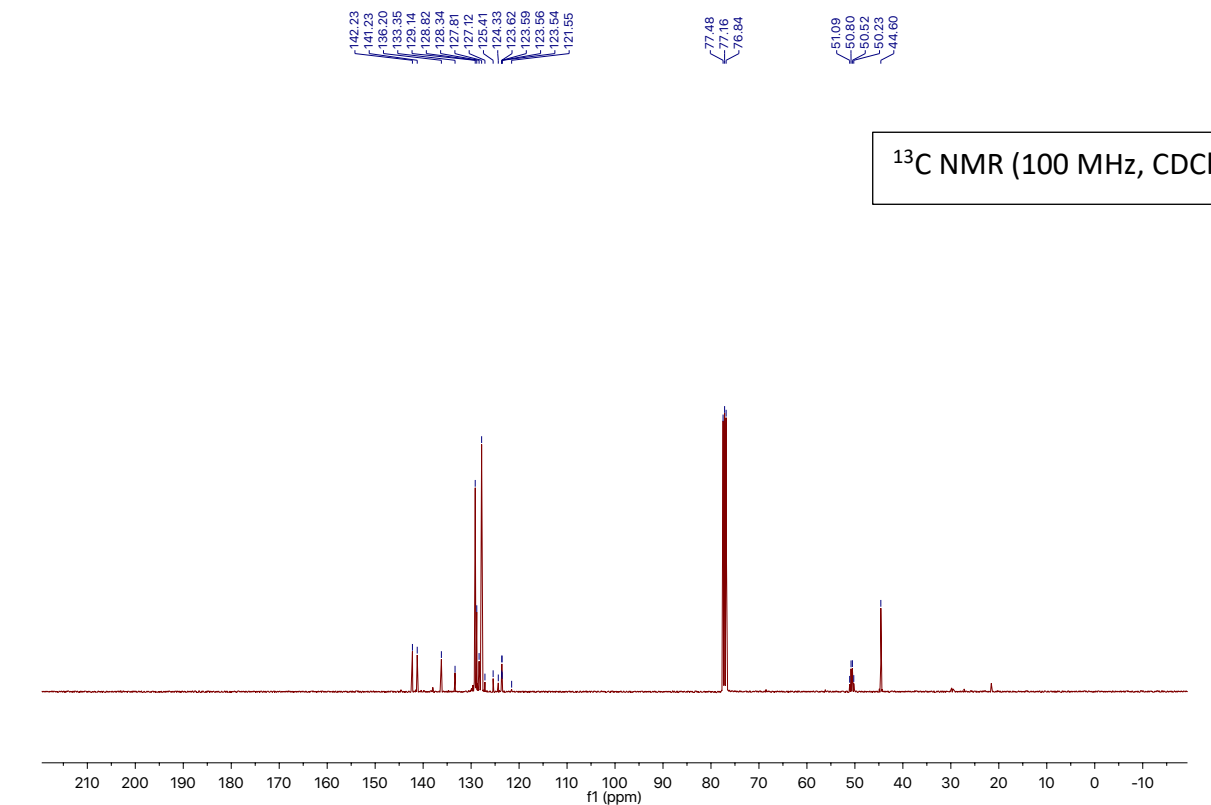

**(Z)-1-(1-chloro-4,4,4-trifluoro-3-phenylbut-1-en-1-yl)-4-methylbenzene (5f)**

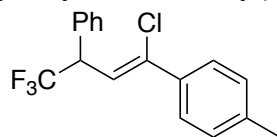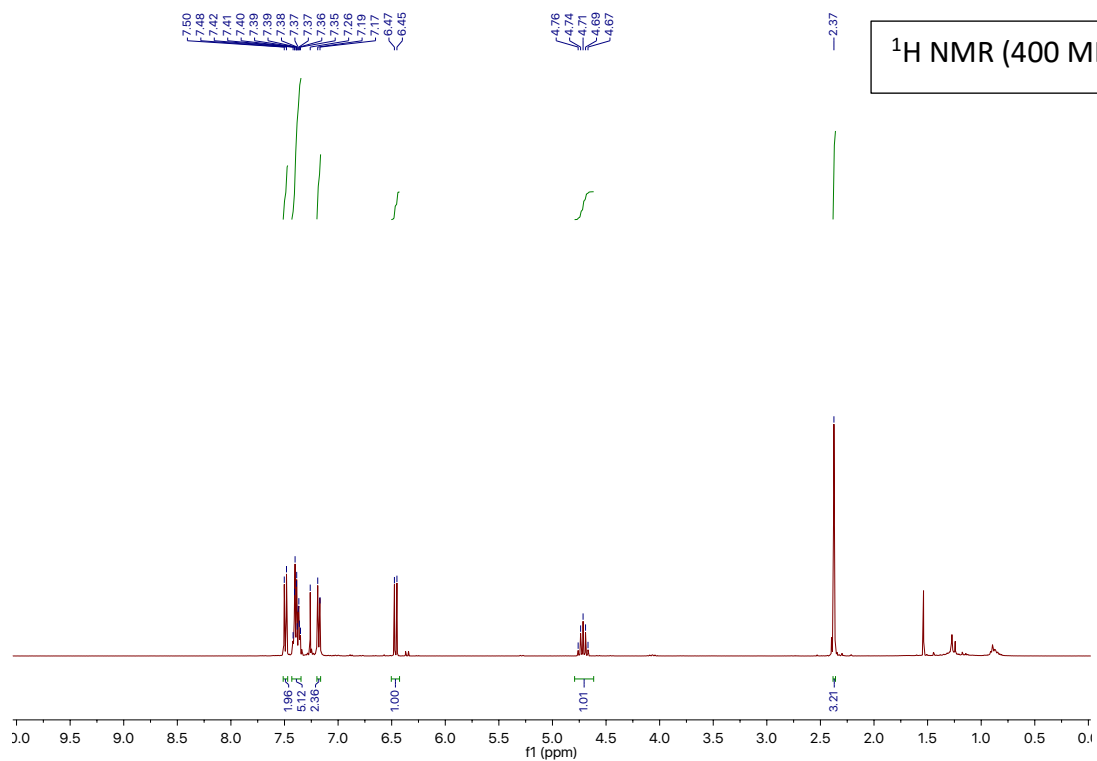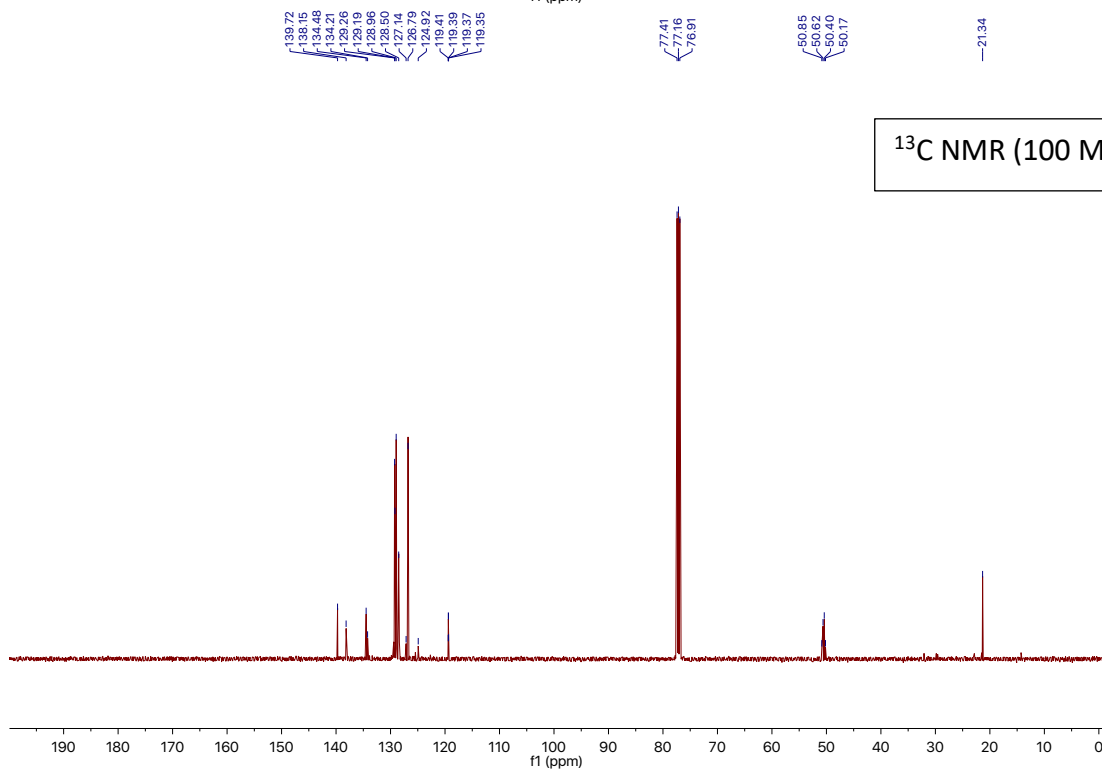

**(Z)-2-(1-chloro-4,4,4-trifluoro-3-phenylbut-1-en-1-yl)naphthalene (5g)**

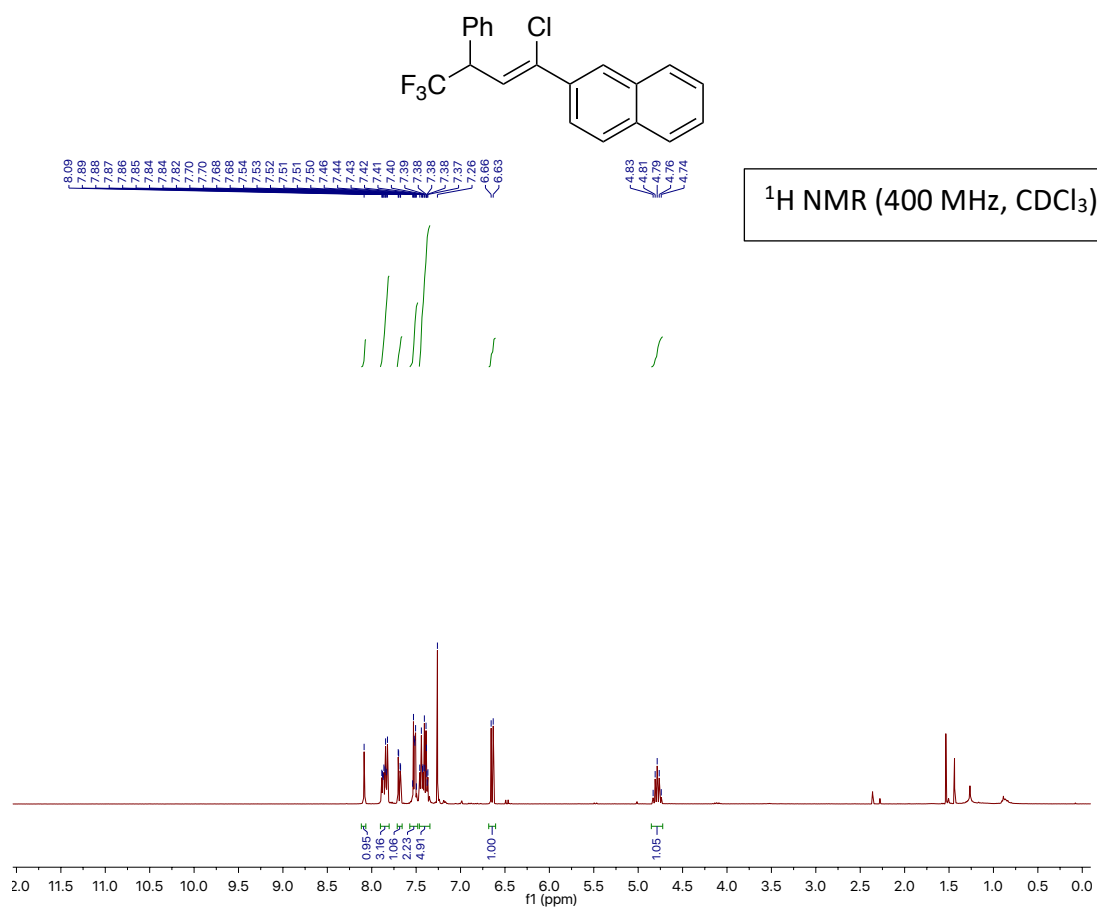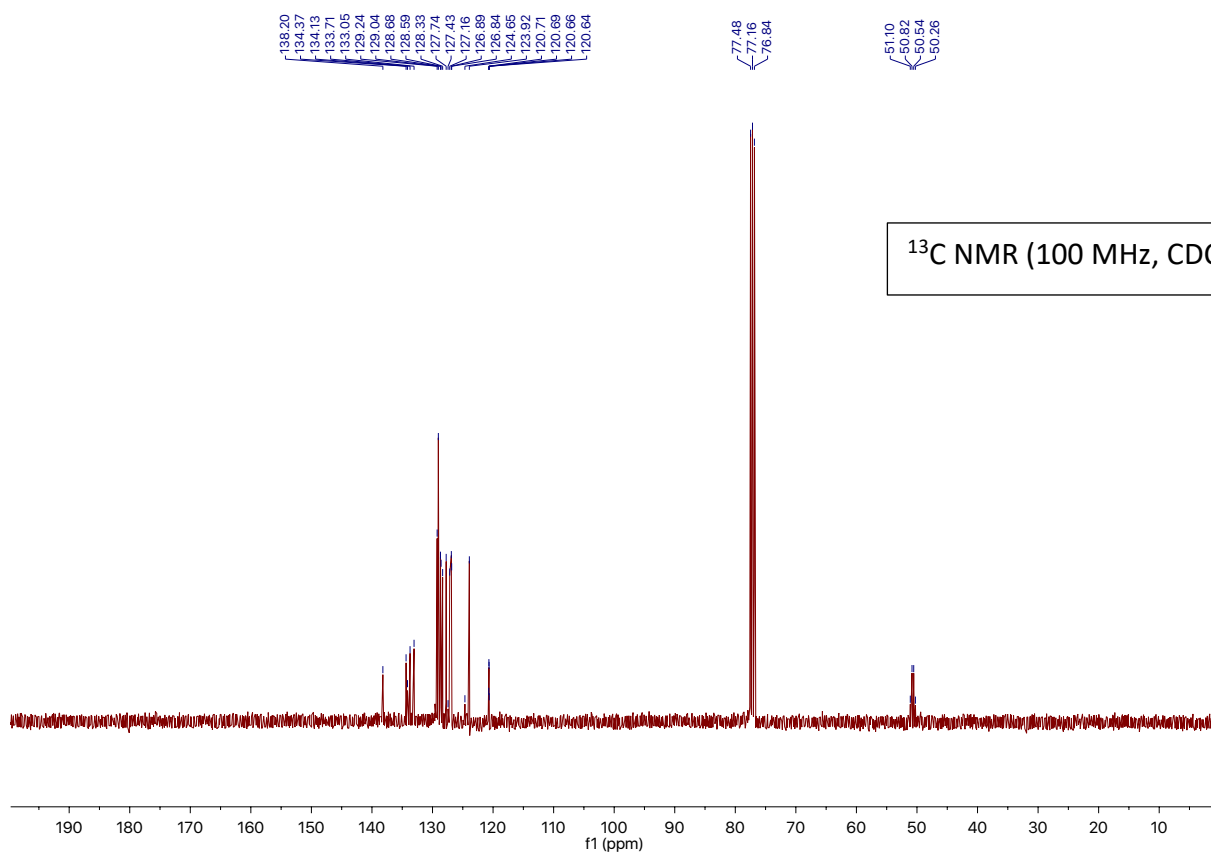



**(Z)-(1-chloro-4,4,4-trifluorobut-1-en-1-yl)benzene (5j)**

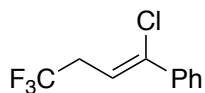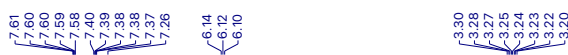

**<sup>1</sup>H NMR (400 MHz, CDCl<sub>3</sub>)**

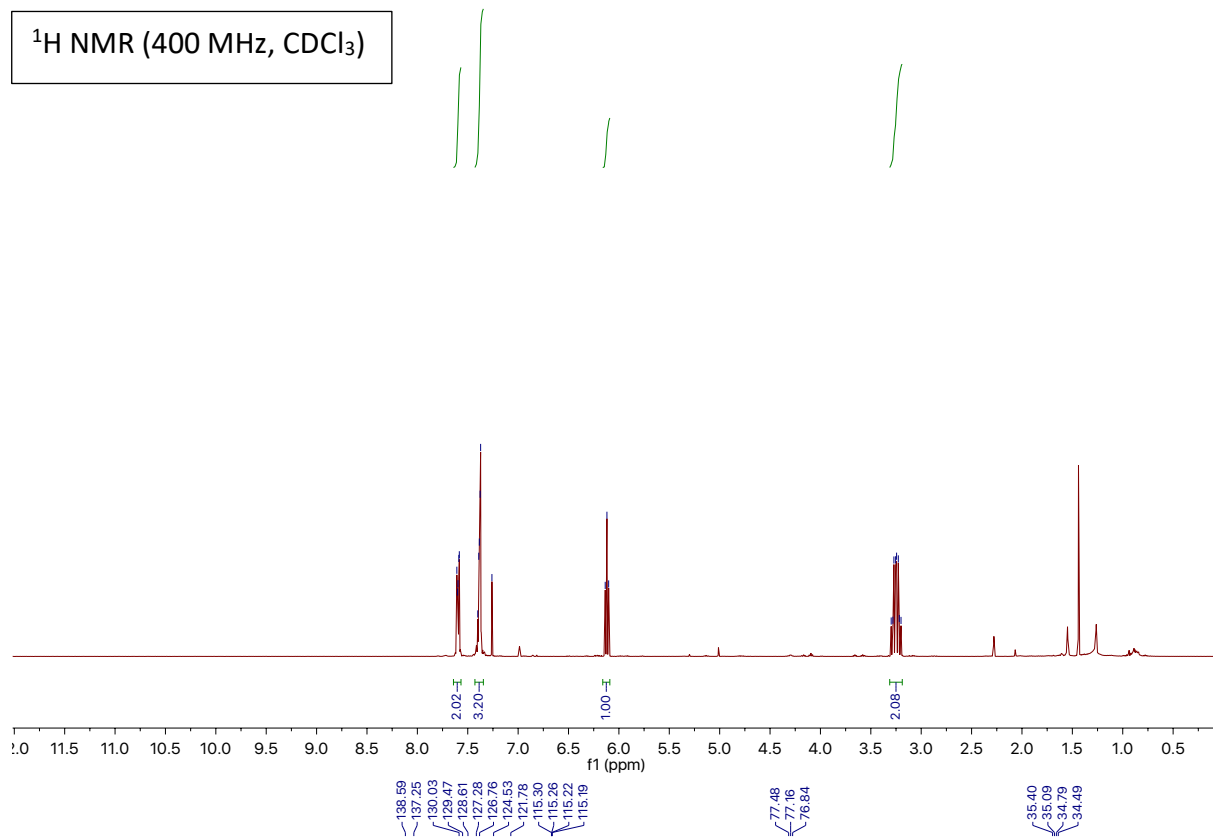

**<sup>13</sup>C NMR (100 MHz, CDCl<sub>3</sub>)**

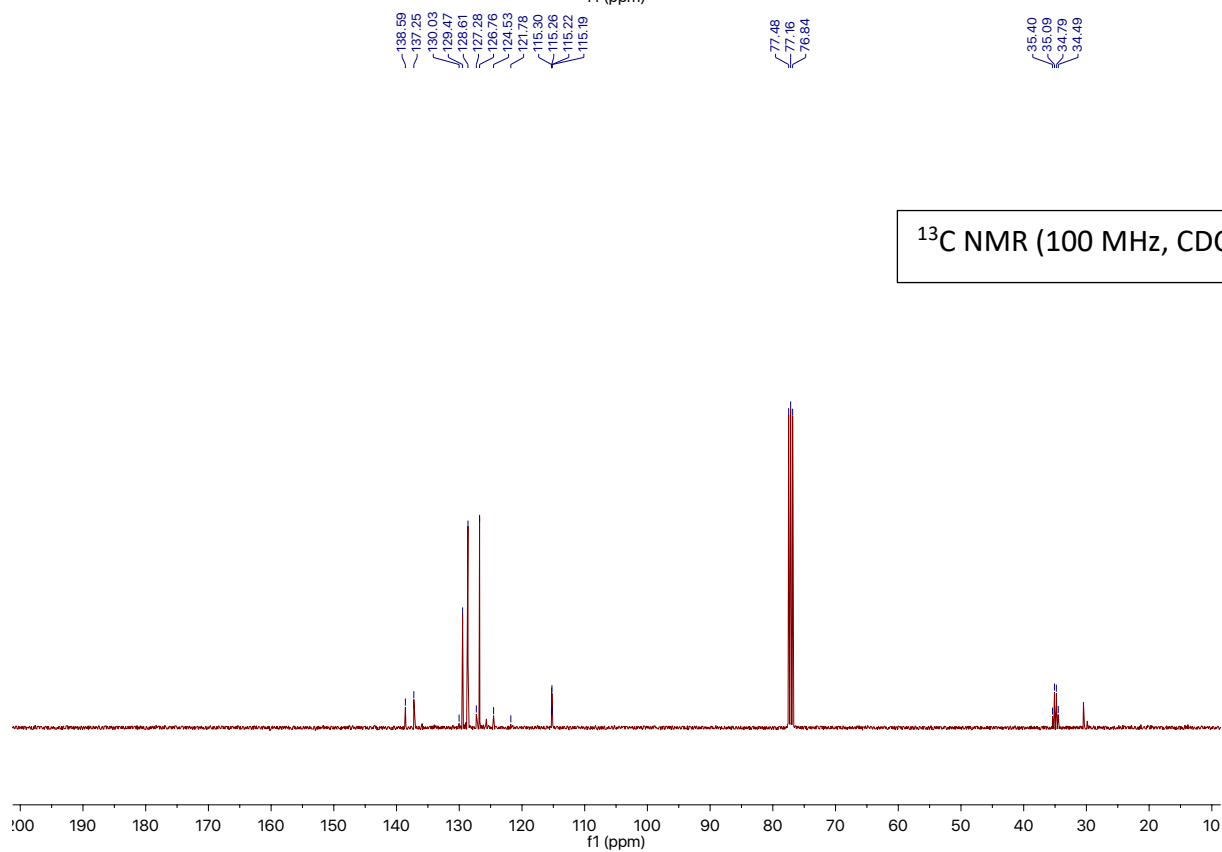

**(Z)-(1-chloro-4,4,4-trifluoro-3-methylbut-1-en-1-yl)benzene (5k)**

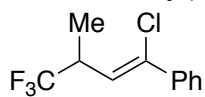

**<sup>1</sup>H NMR (400 MHz, CDCl<sub>3</sub>)**

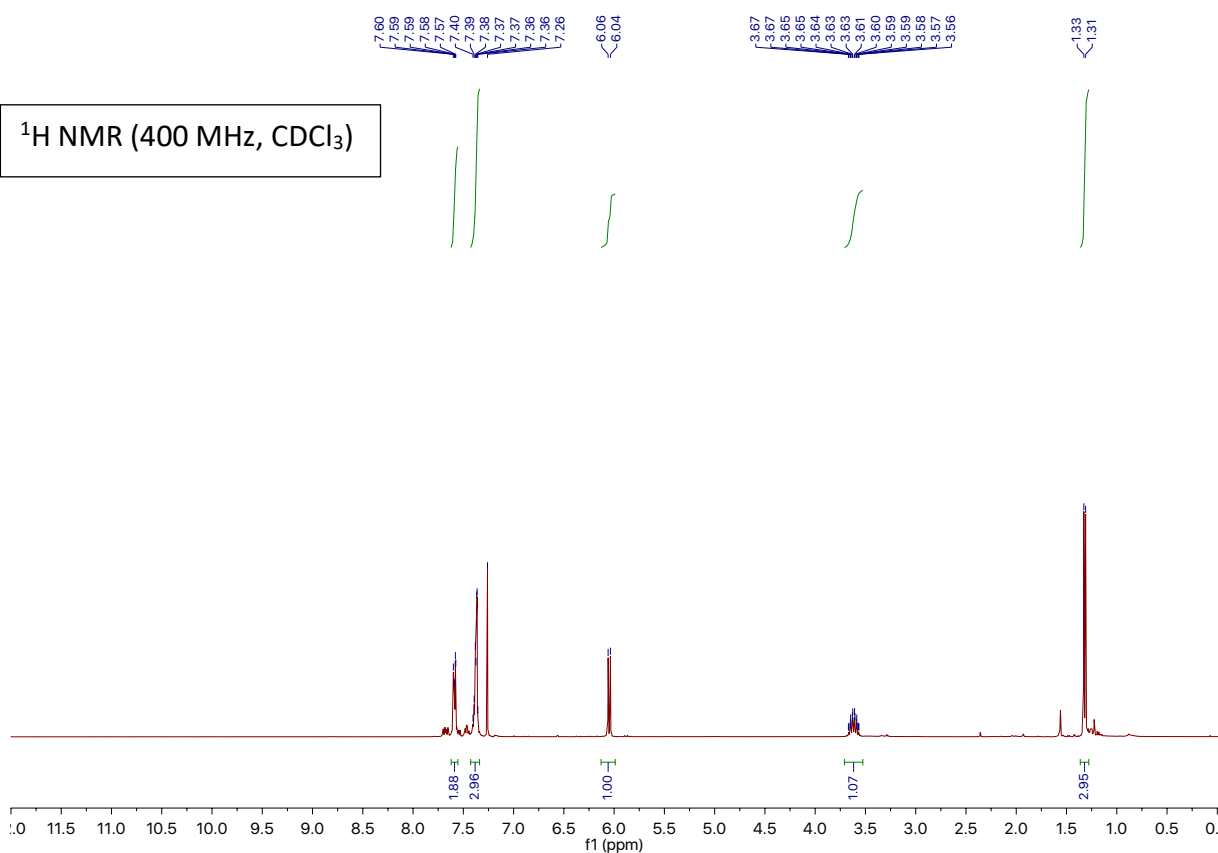

**<sup>13</sup>C NMR (100 MHz, CDCl<sub>3</sub>)**

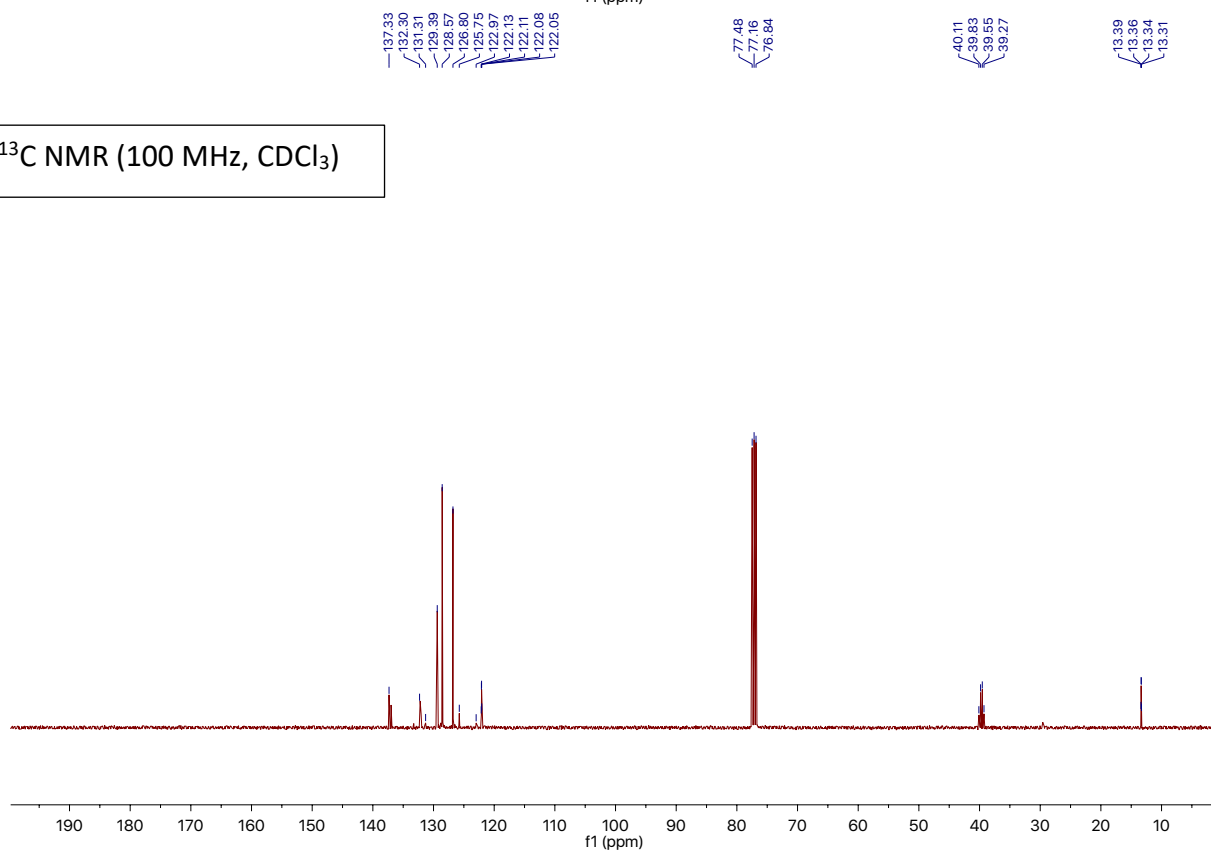

**(Z)-1-chloro-4-(4-chloro-1,1,1-trifluoro-4-phenylbut-3-en-2-yl)benzene (5l)**

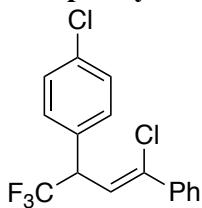

$^1\text{H NMR}$  (400 MHz,  $\text{CDCl}_3$ )

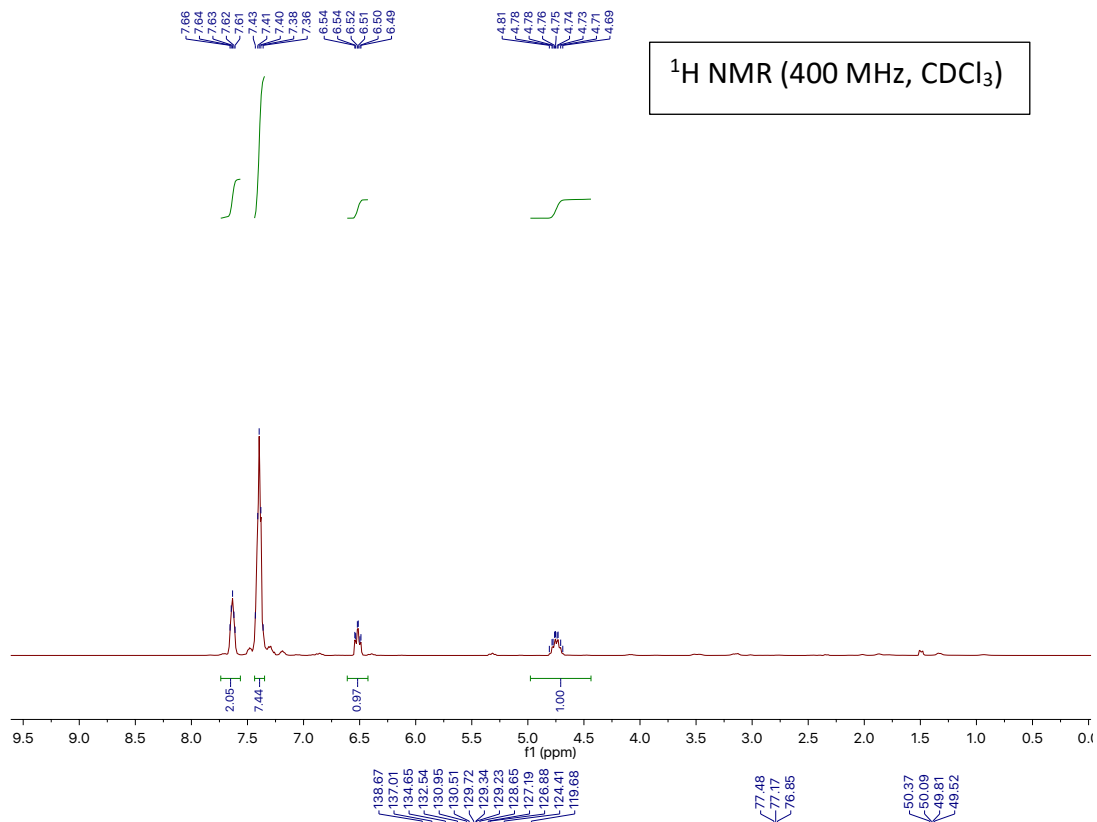

$^{13}\text{C NMR}$  (100 MHz,  $\text{CDCl}_3$ )

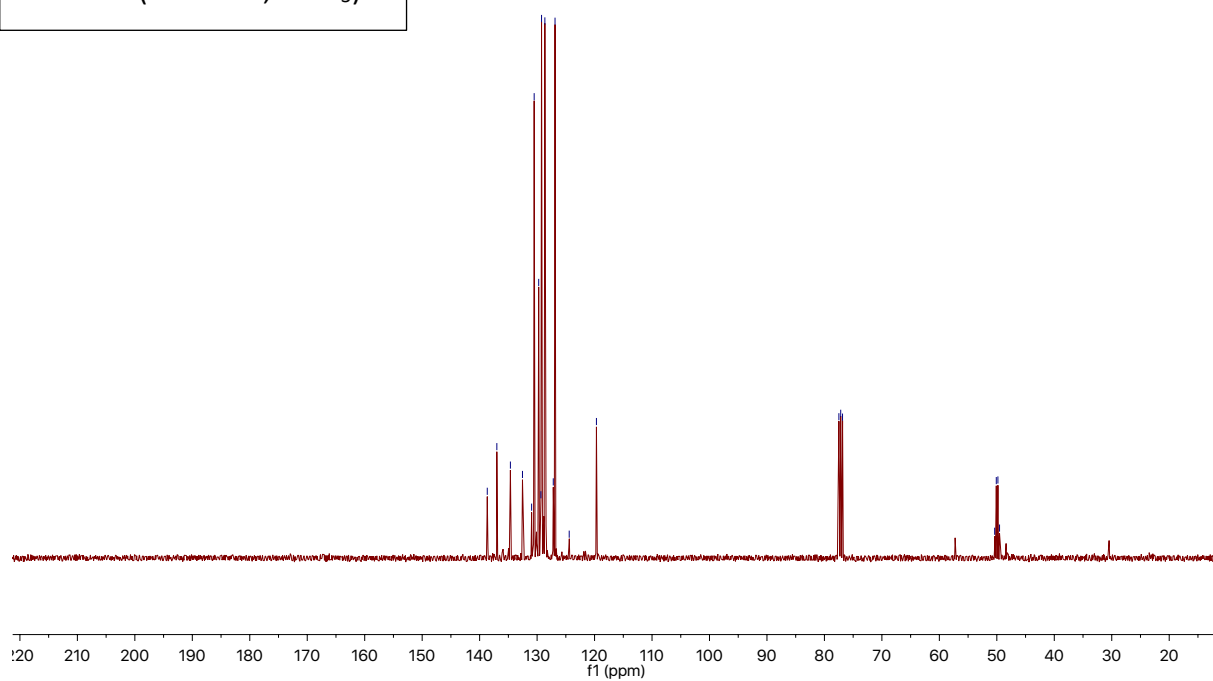

**(Z)-1-(4-chloro-1,1,1-trifluoro-4-phenylbut-3-en-2-yl)-4-(trifluoromethyl)benzene (5m)**

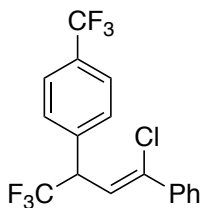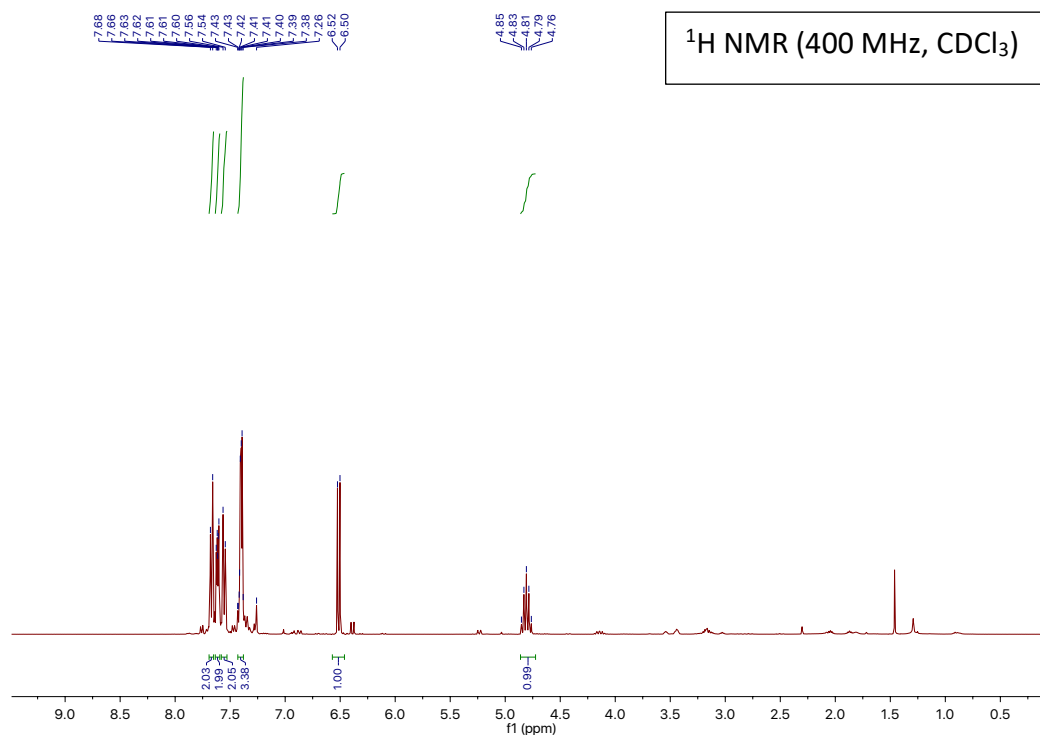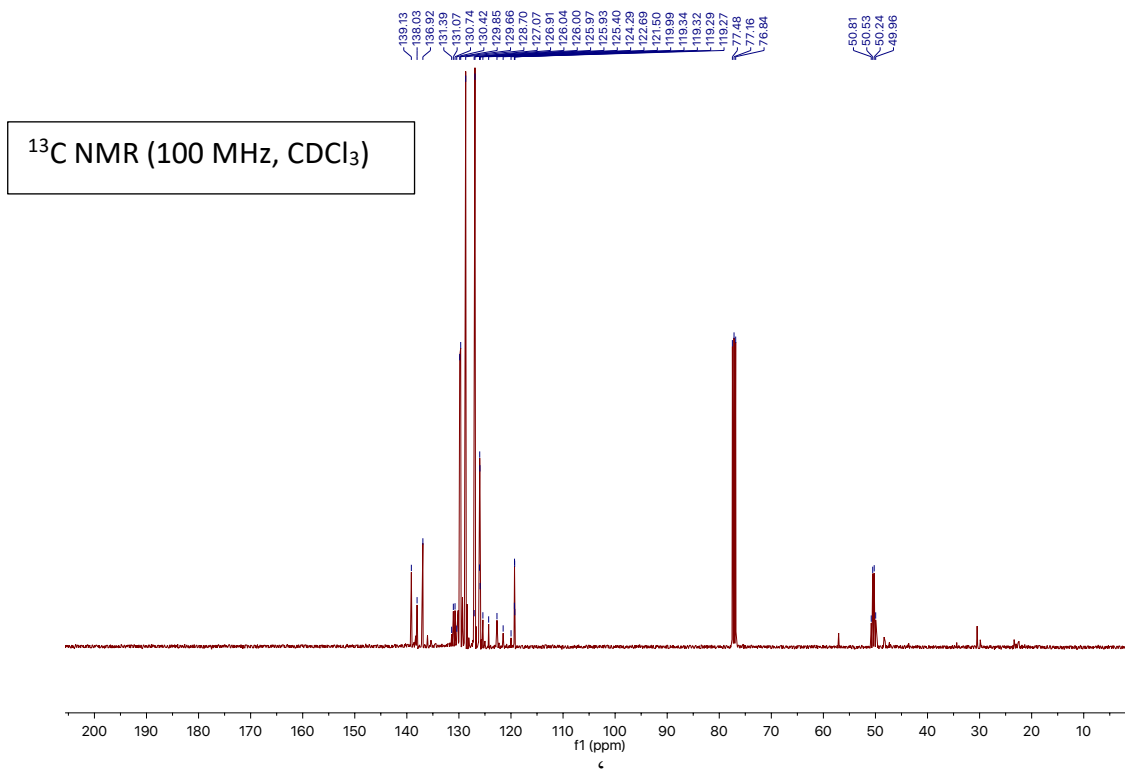

**(Z)-(1-chloro-3-(phenylsulfonyl)prop-1-ene-1,3-diyl)dibenzene ((Z)-5n)**

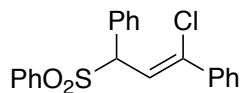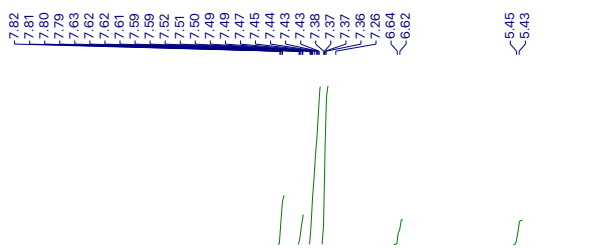

<sup>1</sup>H NMR (400 MHz, CDCl<sub>3</sub>)

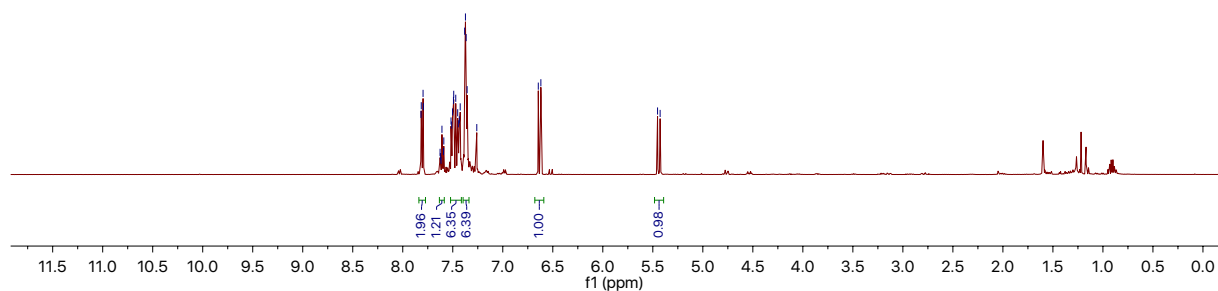

<sup>13</sup>C NMR (100 MHz, CDCl<sub>3</sub>)

**(E)-(1-chloro-3-(phenylsulfonyl)prop-1-ene-1,3-diyl)dibenzene ((E)-5n)**

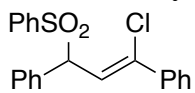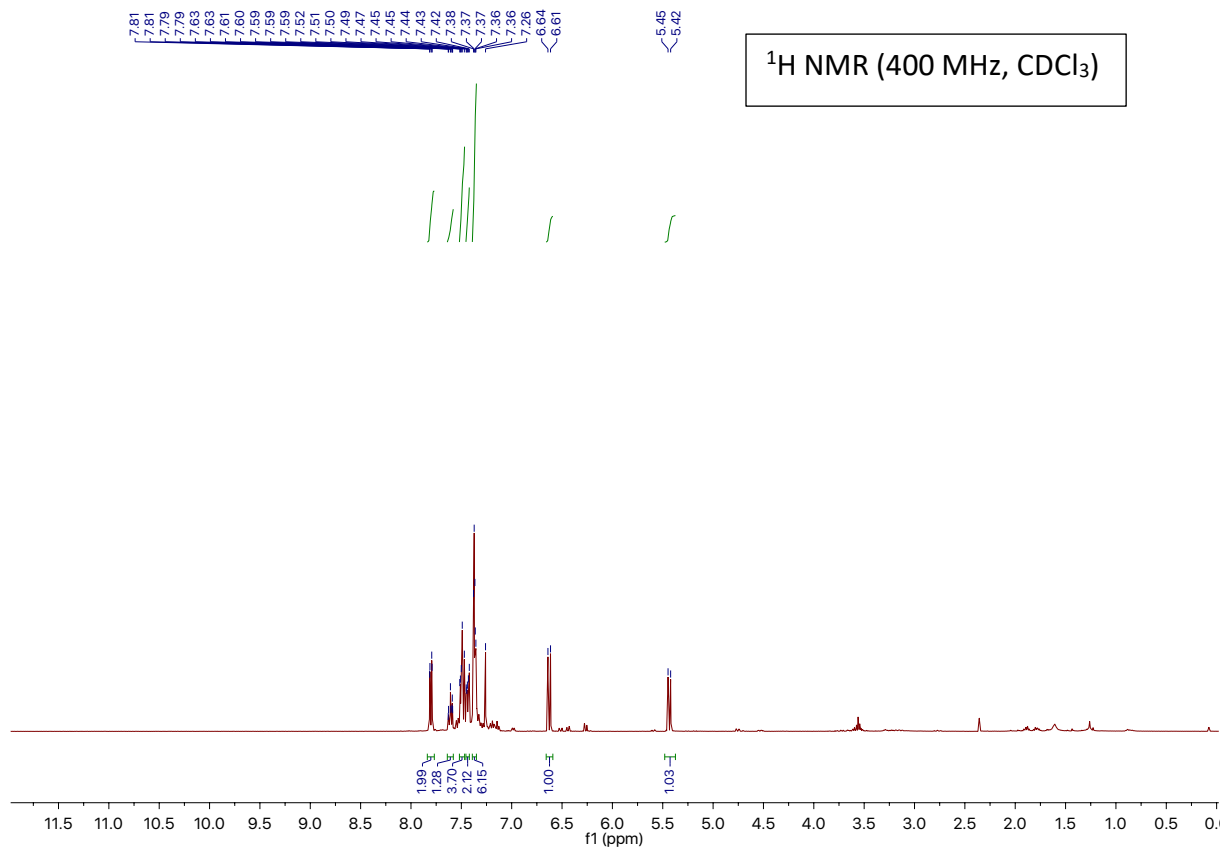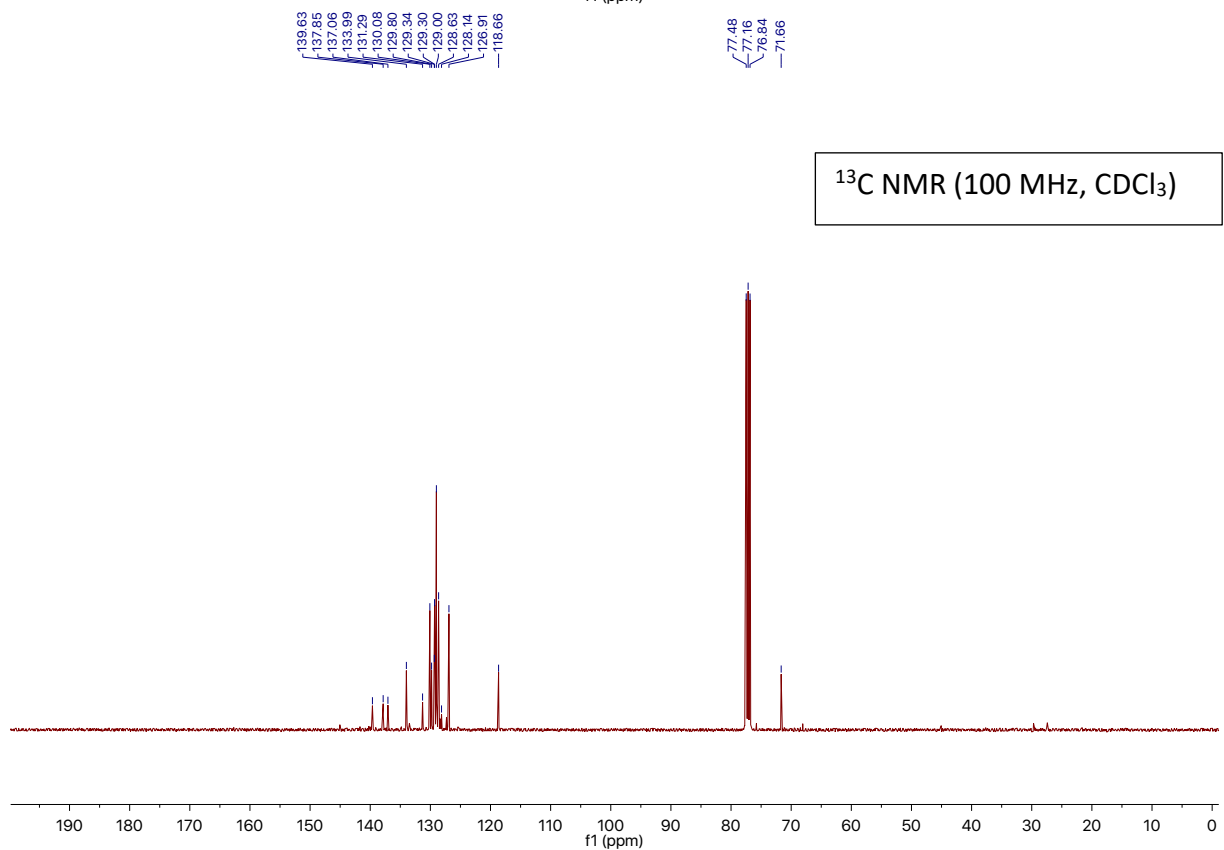

**(Z)-(1-bromo-4,4,4-trifluorobut-1-ene-1,3-diyl)dibenzene (6a)**

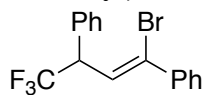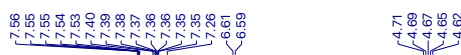

**<sup>1</sup>H NMR (400 MHz, CDCl<sub>3</sub>)**

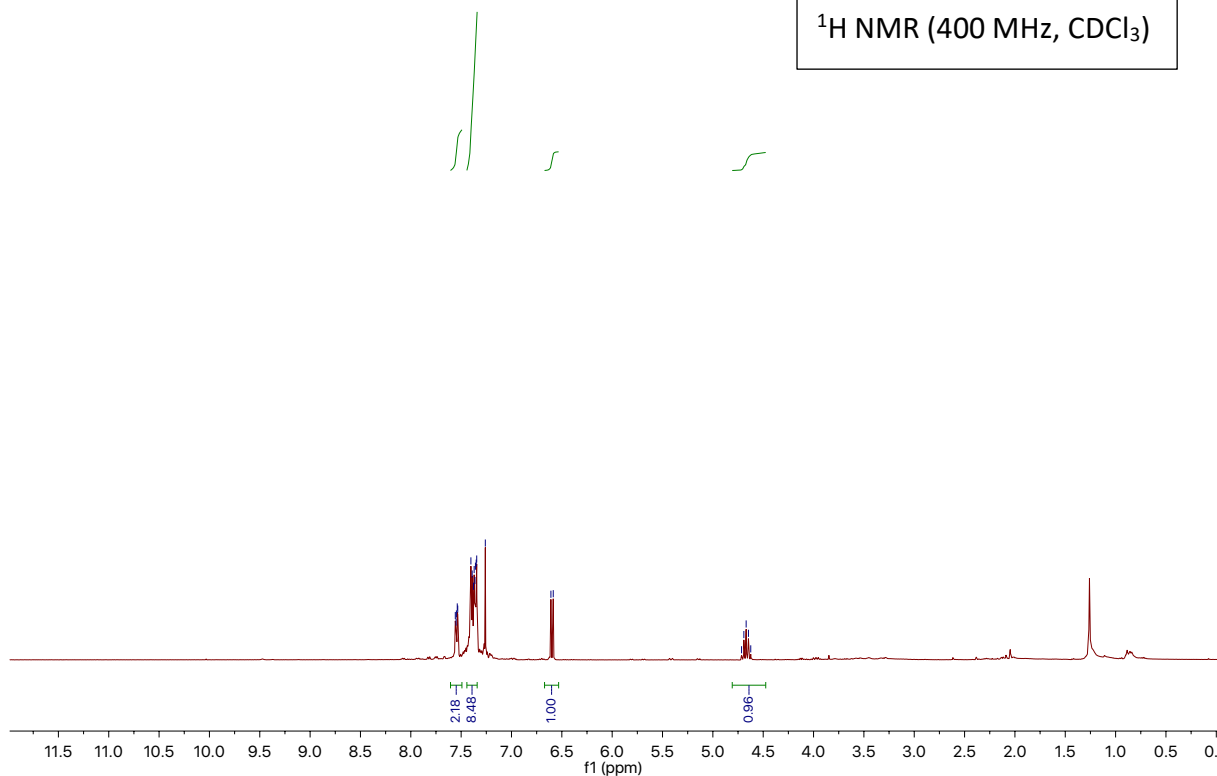

**<sup>13</sup>C NMR (100 MHz, CDCl<sub>3</sub>)**

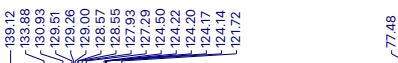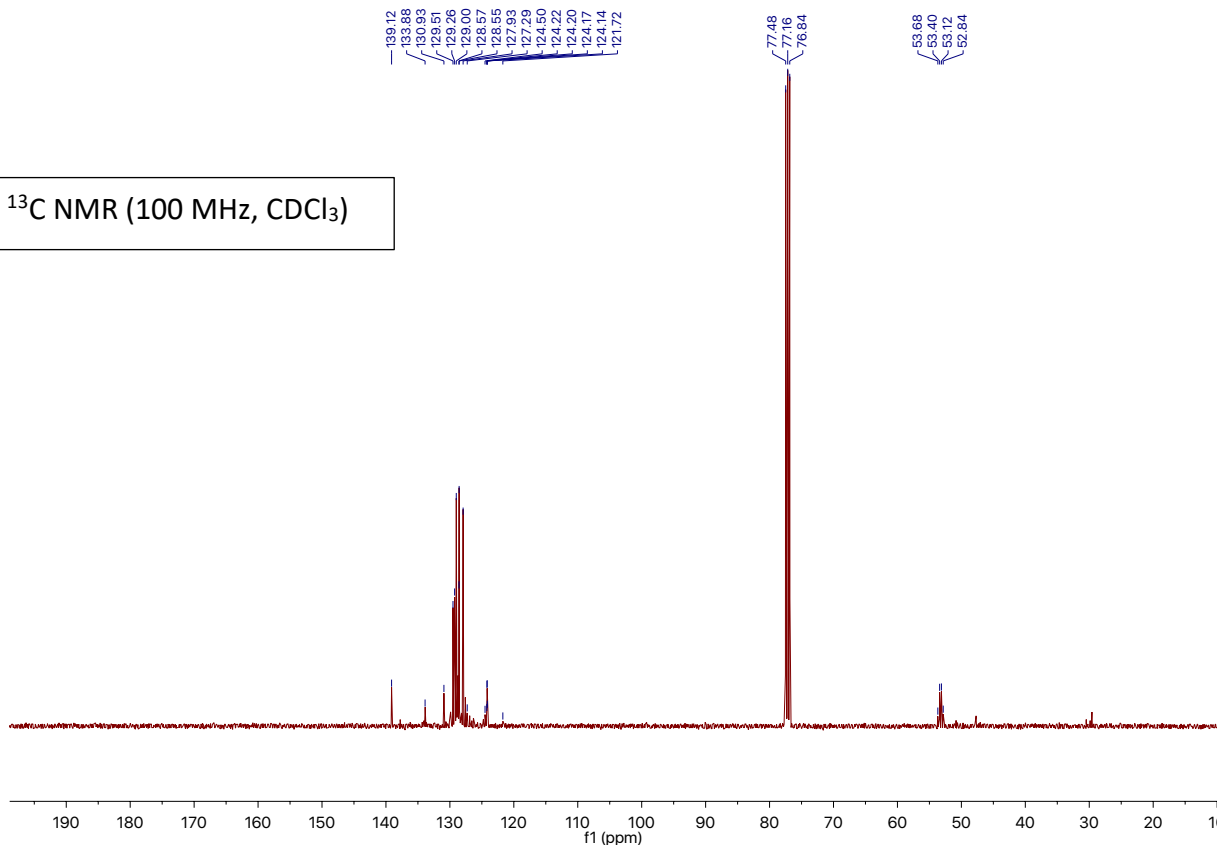

**(Z)-1-(1-bromo-4,4,4-trifluoro-3-phenylbut-1-en-1-yl)-4-(trifluoromethyl)benzene (6b)**

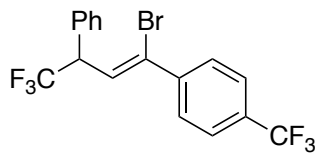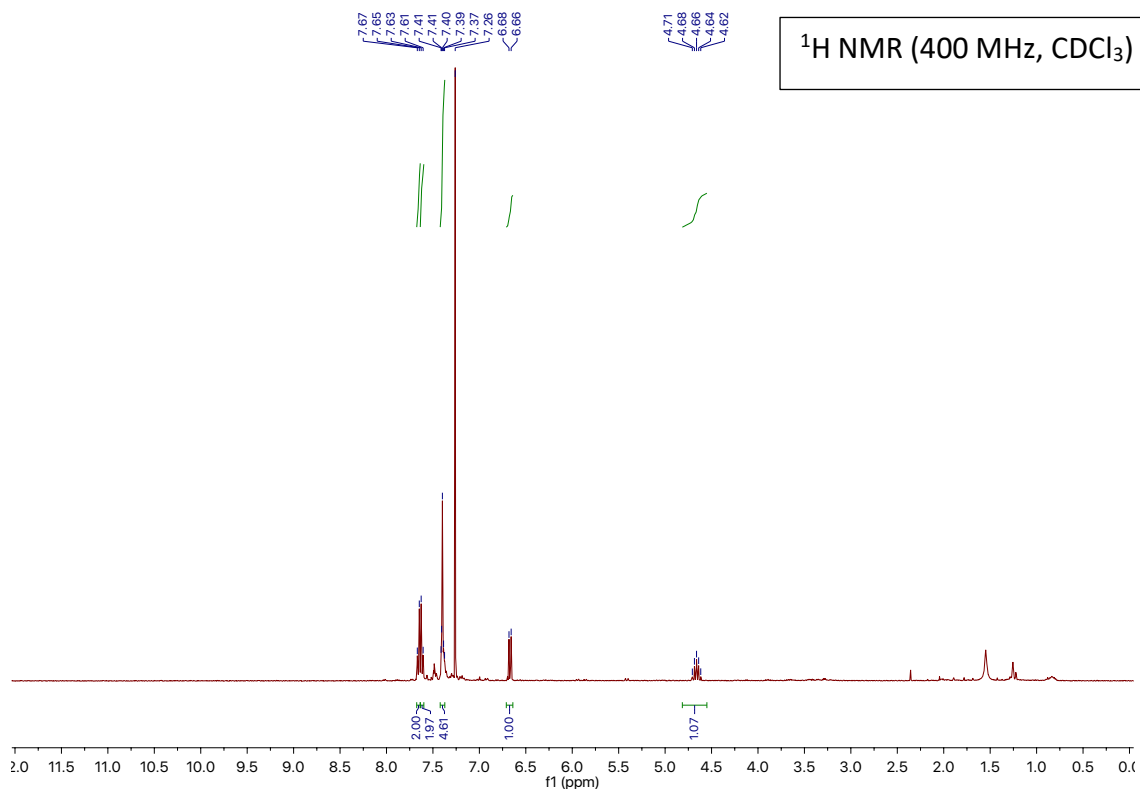

**<sup>13</sup>C NMR (100 MHz, CDCl<sub>3</sub>)**

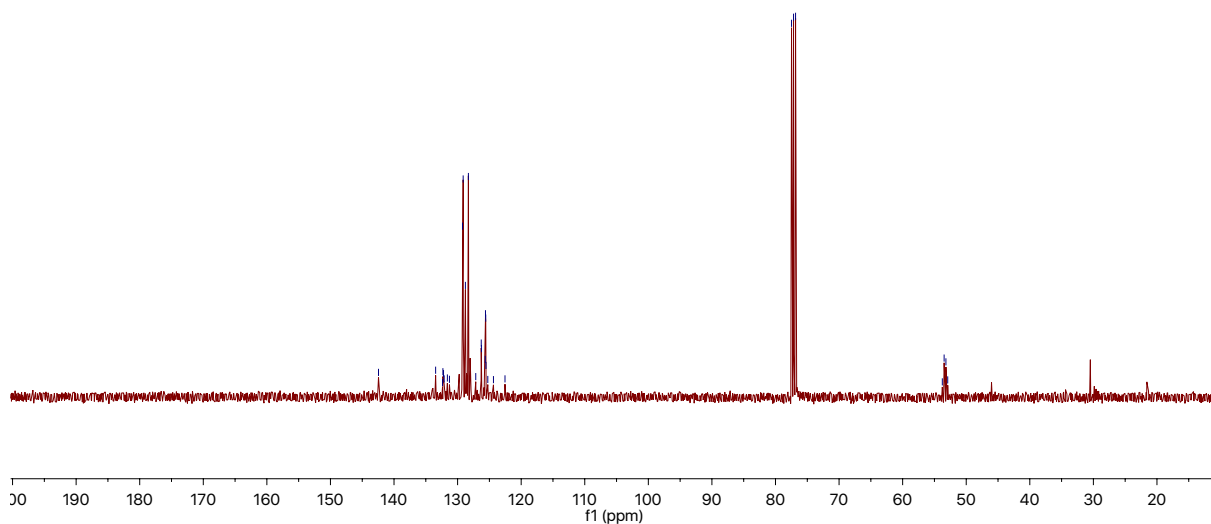



**Z)-(1-bromo-3-(phenylsulfonyl)prop-1-ene-1,3-diyl)dibenzene (6c)**

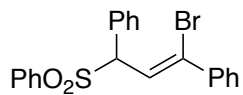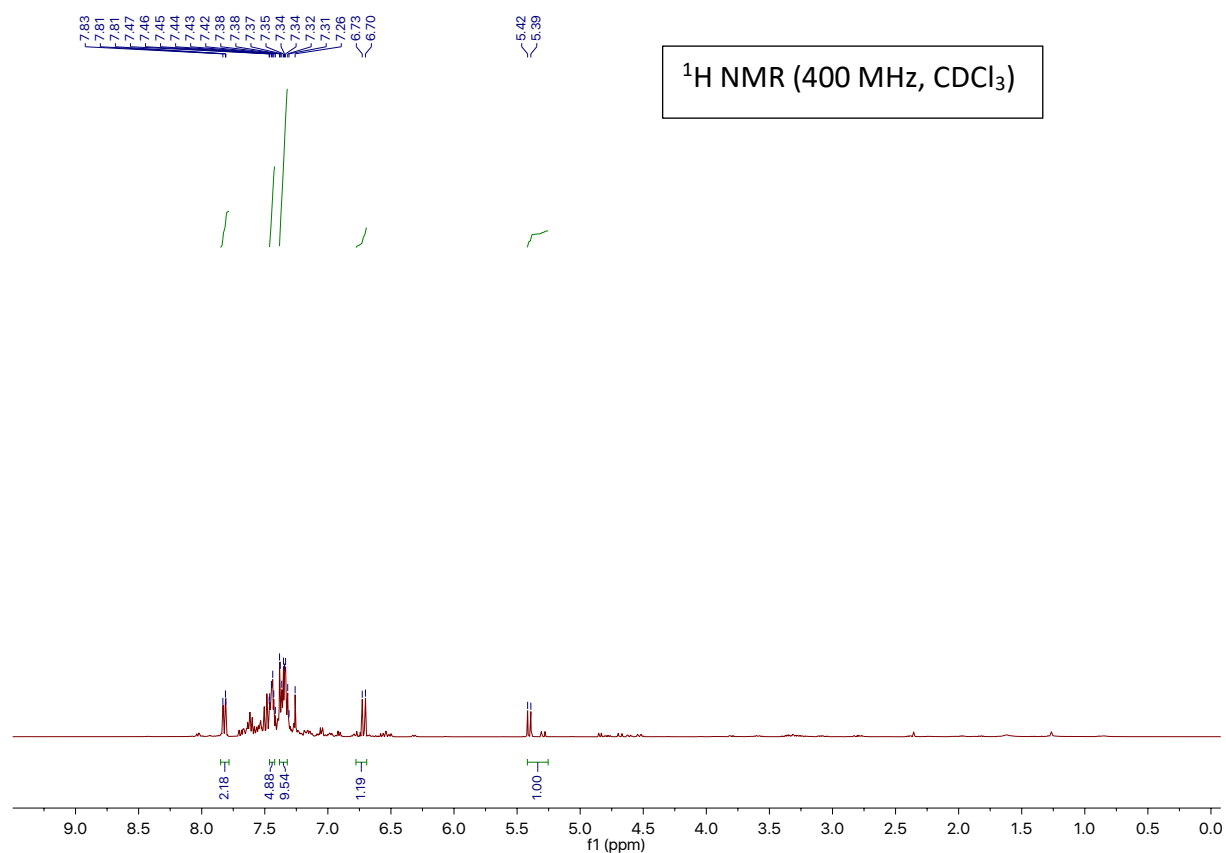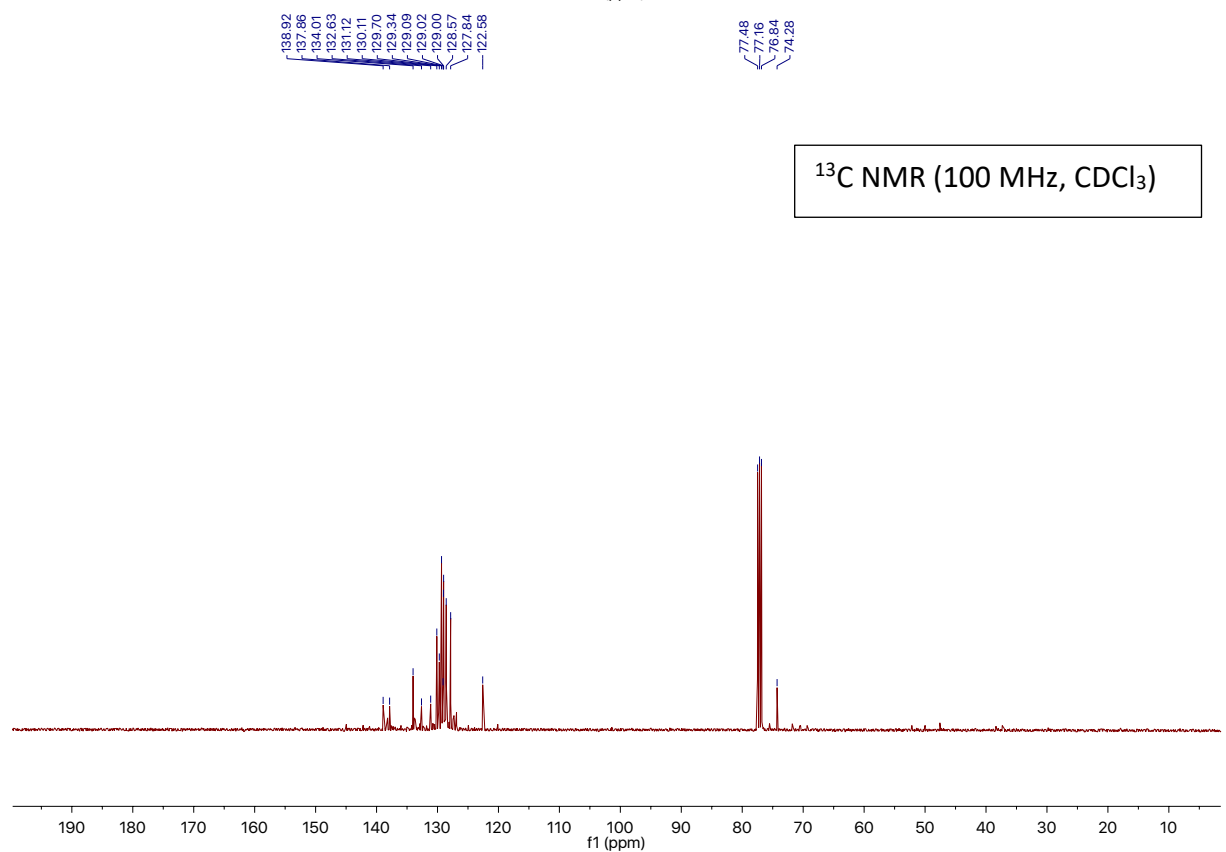

**(Z)-(1-fluoro-4,4,4-trifluorobut-1-ene-1,3-diyl)dibenzene (7a)**

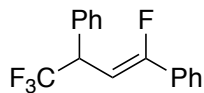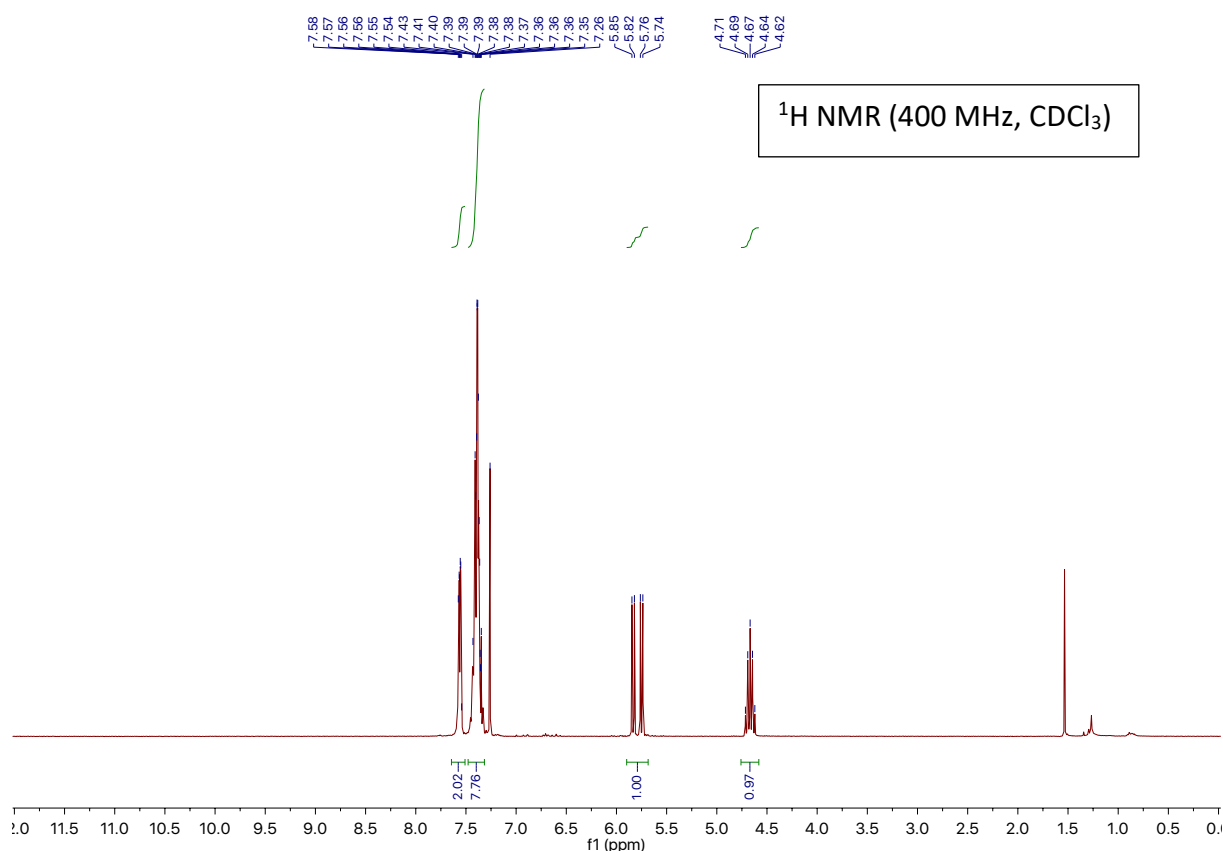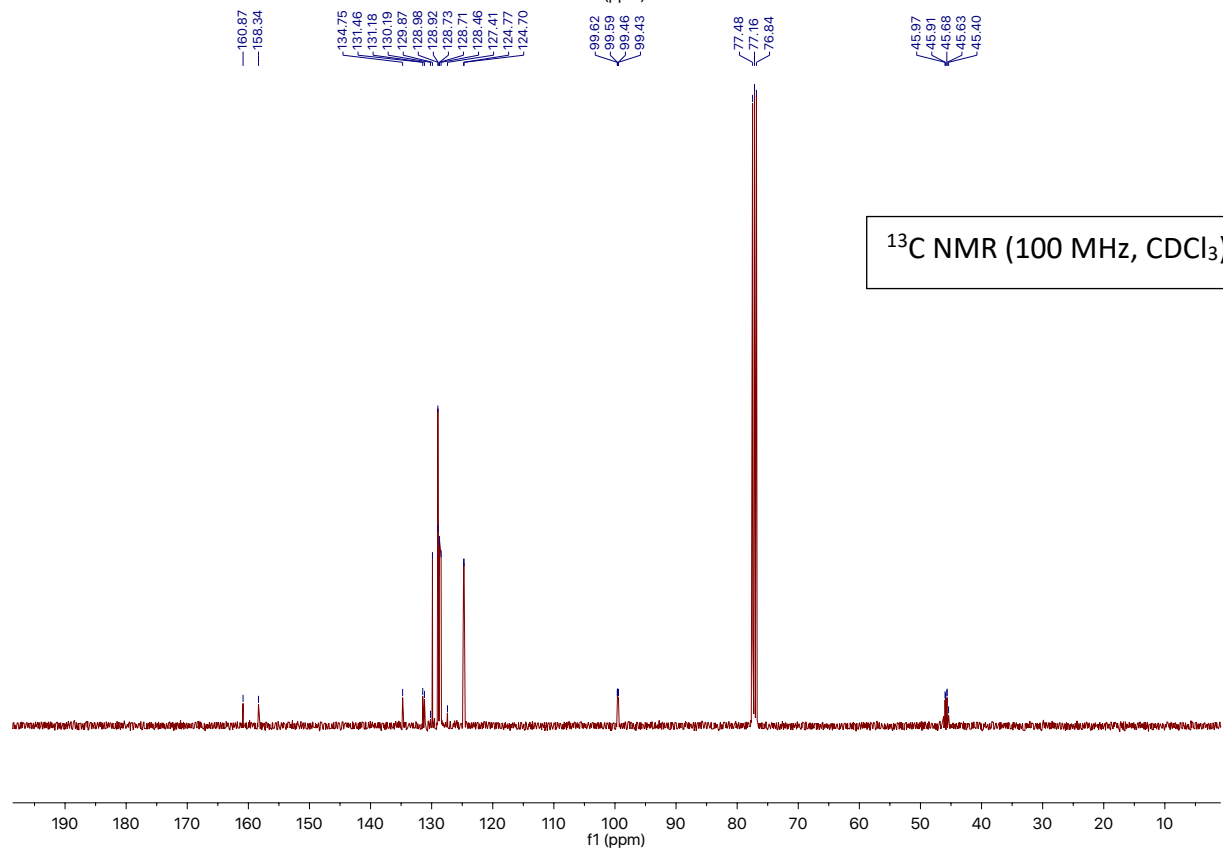

**(Z)-1-(1-fluoro-4,4,4-trifluoro-3-phenylbut-1-en-1-yl)-4-(trifluoromethyl)benzene (7b)**

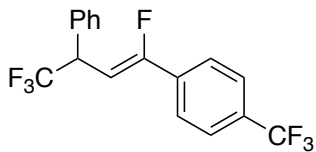

7.69  
7.67  
7.64  
7.61  
7.59  
7.44  
7.43  
7.41  
7.39  
7.37  
7.36  
7.26  
5.98  
5.95  
5.93  
4.74  
4.72  
4.69  
4.67  
4.65

$^1\text{H NMR}$  (400 MHz,  $\text{CDCl}_3$ )

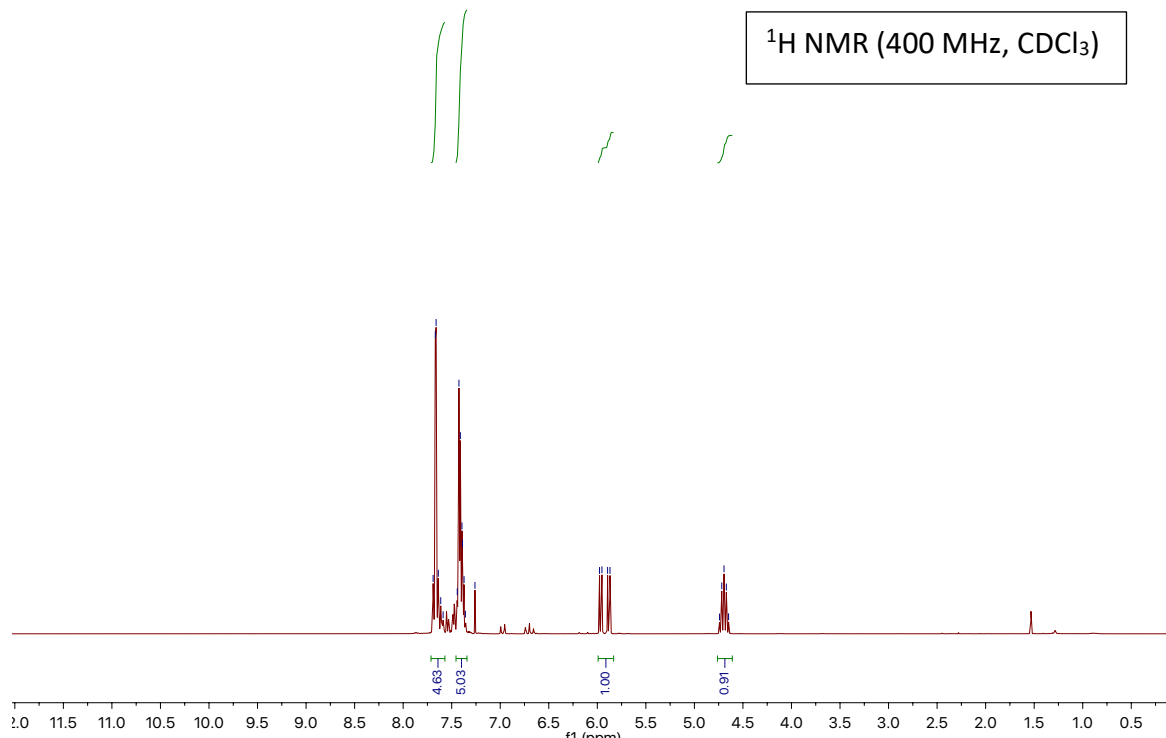

159.88  
157.05  
134.76  
134.48  
134.27  
132.61  
132.60  
131.86  
131.23  
129.83  
129.12  
128.90  
128.68  
127.26  
125.80  
125.78  
125.77  
125.75  
125.27  
125.07  
125.00  
122.86  
119.86  
102.02  
101.99  
101.86  
101.83  
77.48  
77.16  
76.84  
46.37  
46.31  
46.08  
46.02  
45.79  
45.74  
45.50  
45.45

$^{13}\text{C NMR}$  (100 MHz,  $\text{CDCl}_3$ )

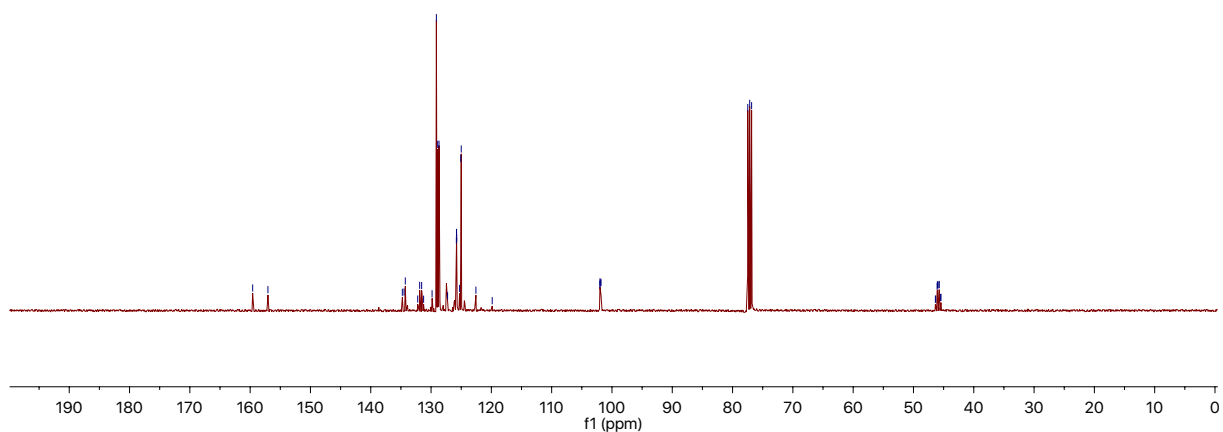

**(Z)-2-(1-fluoro-4,4,4-trifluoro-3-phenylbut-1-en-1-yl)naphthalene (7c)**

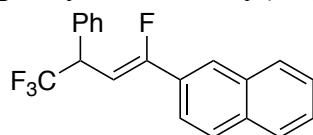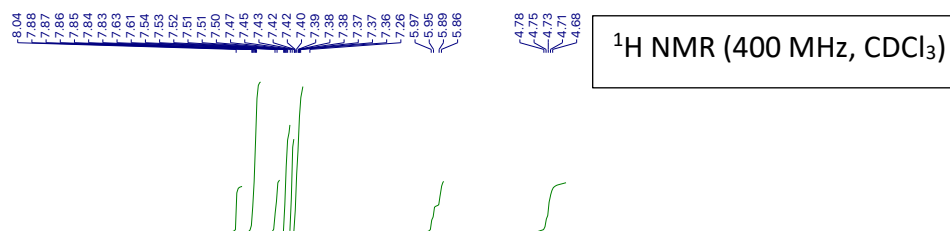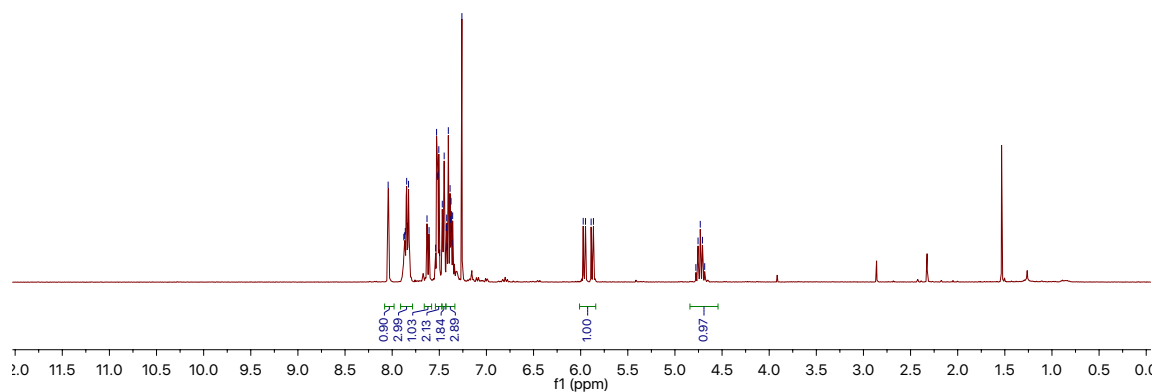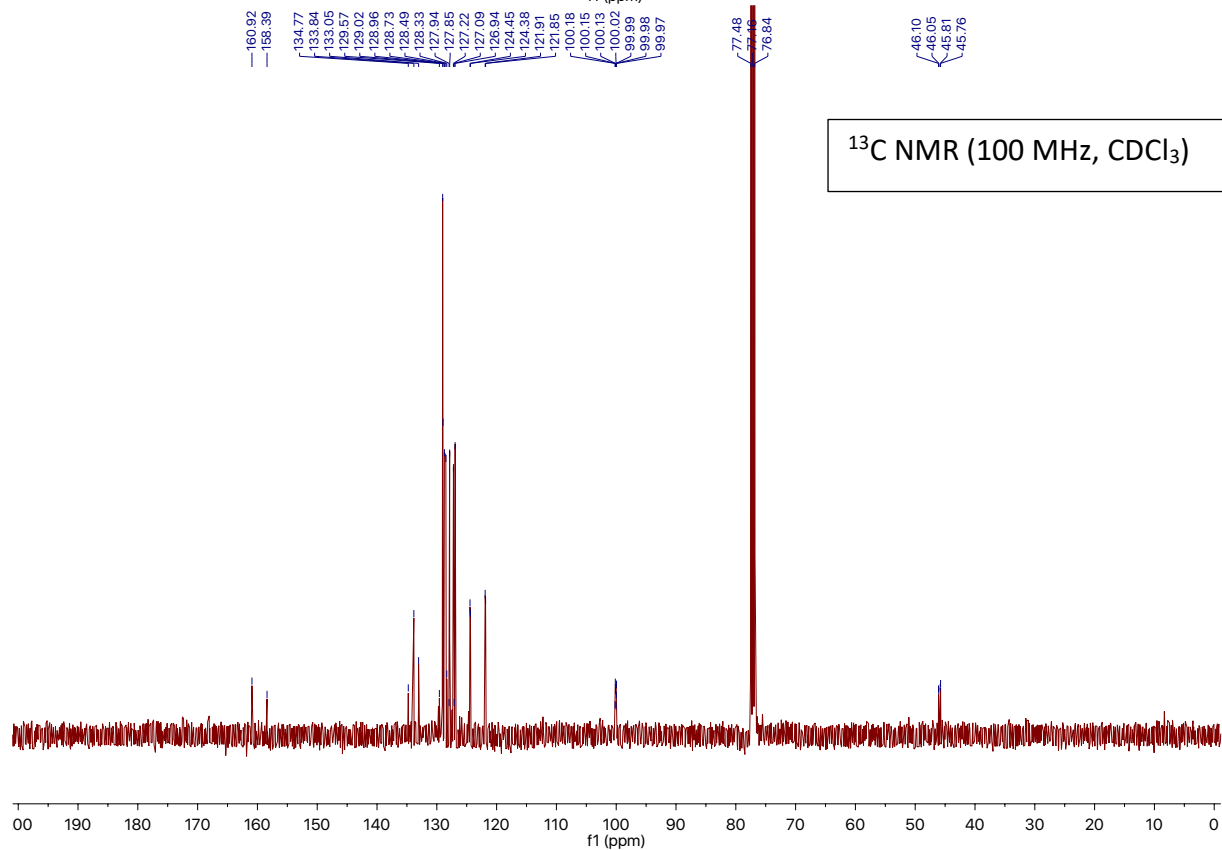

## HPLC Chromatograms of allylic chlorides 2a, 2b, 2c, 2d, 2e, 2m and 2g

### (E)-(1-chloro-4,4,4-trifluorobut-2-ene-1,3-diyl)dibenzene (2a)

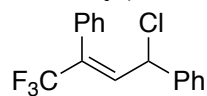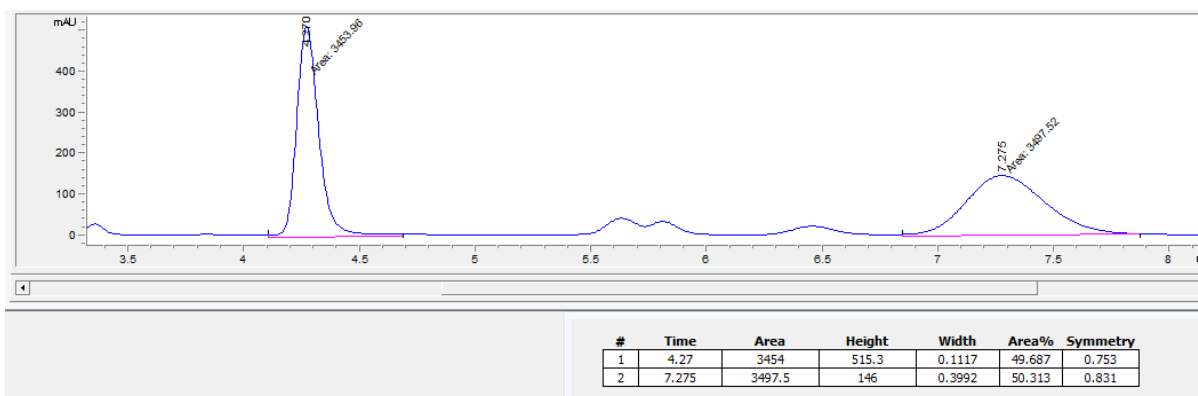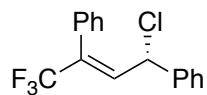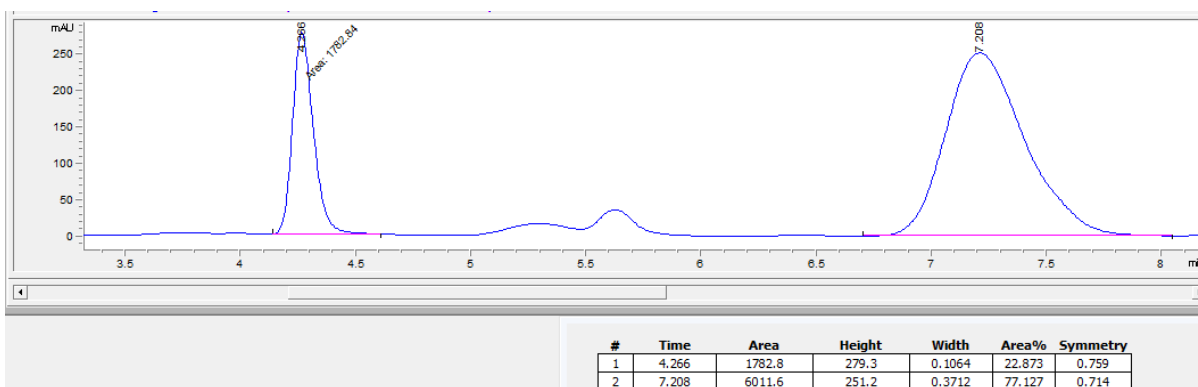

### (E)-1-Bromo-4-(1-chloro-4,4,4-trifluoro-3-phenylbut-2-en-1-yl)benzene (2b)

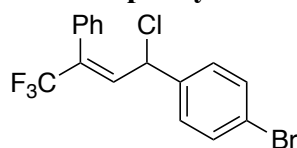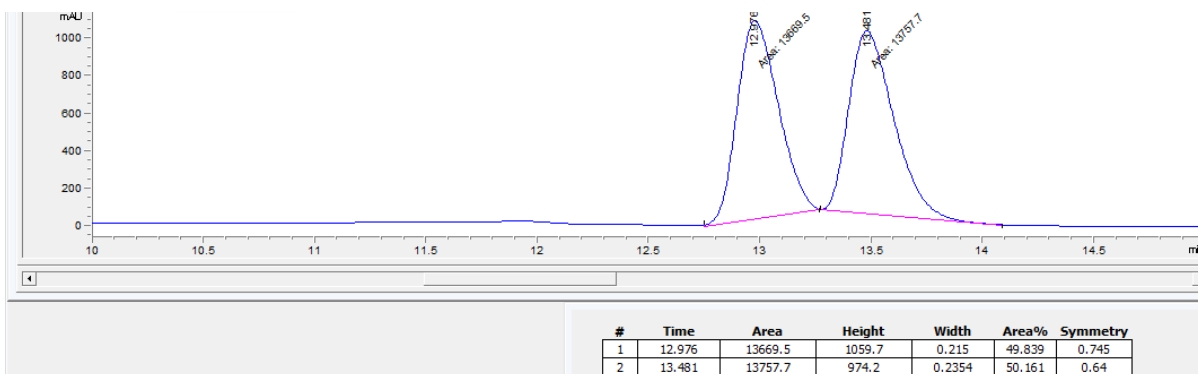

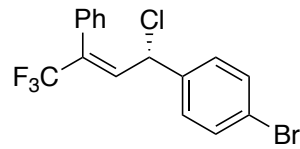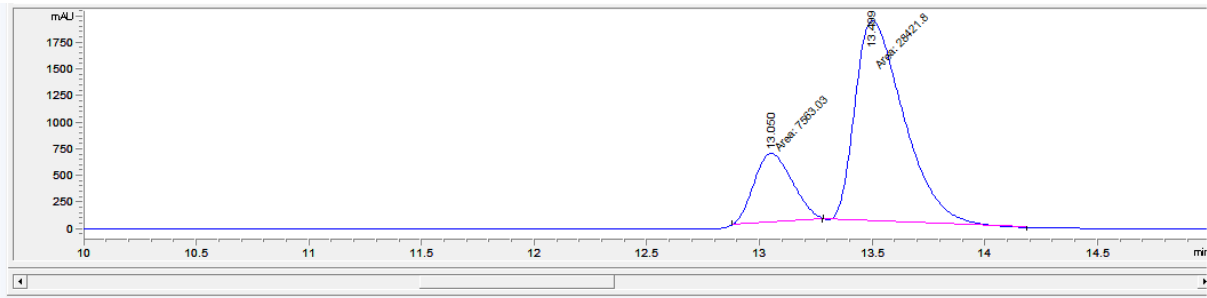

| # | Time   | Area    | Height | Width  | Area%  | Symmetry |
|---|--------|---------|--------|--------|--------|----------|
| 1 | 13.05  | 7563    | 643.1  | 0.196  | 21.017 | 0.808    |
| 2 | 13.499 | 28421.8 | 1884.1 | 0.2514 | 78.983 | 0.538    |

**(E)-1-(1-chloro-4,4,4-trifluoro-3-phenylbut-2-en-1-yl)-4-(trifluoromethyl)benzene (2c)**

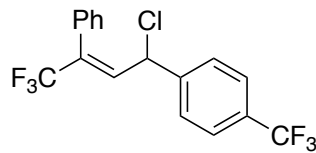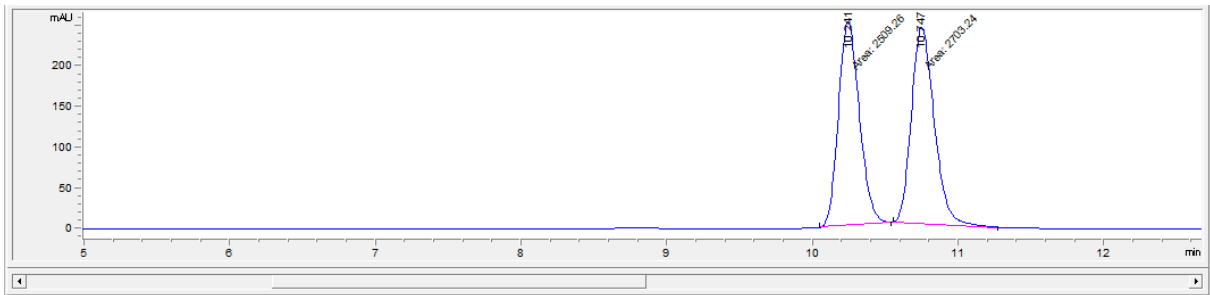

| # | Time   | Area   | Height | Width  | Area%  | Symmetry |
|---|--------|--------|--------|--------|--------|----------|
| 1 | 10.241 | 2509.3 | 251.2  | 0.1665 | 48.139 | 0.82     |
| 2 | 10.747 | 2703.2 | 243.2  | 0.1853 | 51.861 | 0.717    |

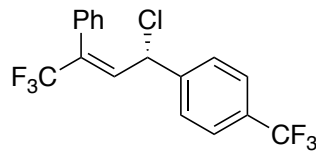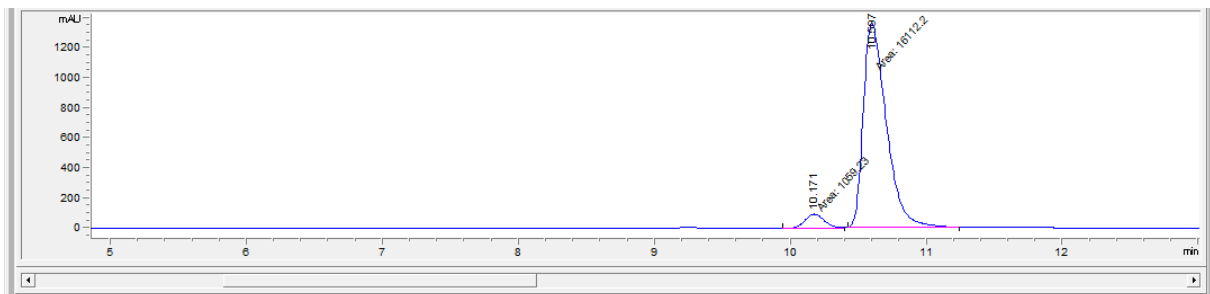

| # | Time   | Area    | Height | Width  | Area%  | Symmetry |
|---|--------|---------|--------|--------|--------|----------|
| 1 | 10.171 | 1059.2  | 98.4   | 0.1794 | 6.169  | 0.974    |
| 2 | 10.597 | 16112.2 | 1361.3 | 0.1973 | 93.831 | 0.606    |

**(E)-4-(1-chloro-4,4,4-trifluoro-3-phenylbut-2-en-1-yl)benzonitrile (2d)**

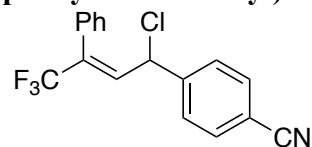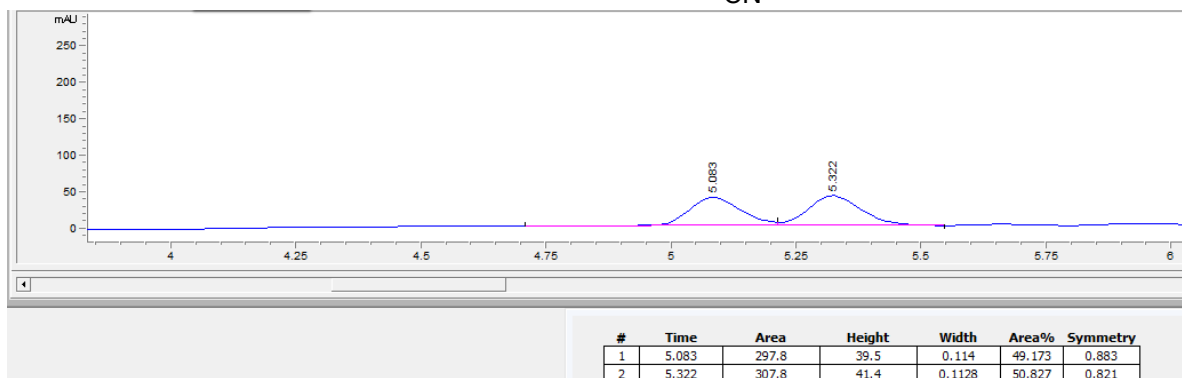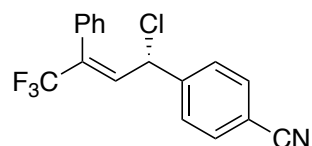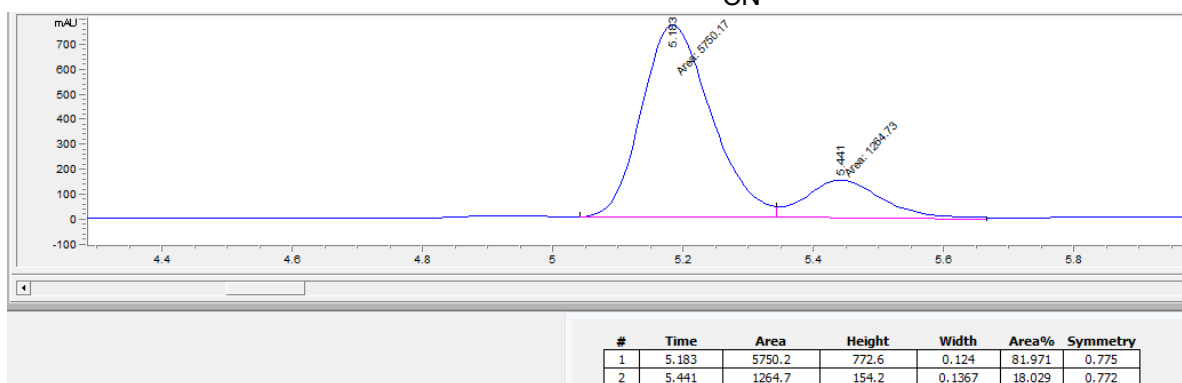

**(E)-1-(1-chloro-4,4,4-trifluoro-3-phenylbut-2-en-1-yl)-4-(methanesulfonyl)benzene (2e)**

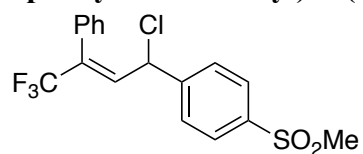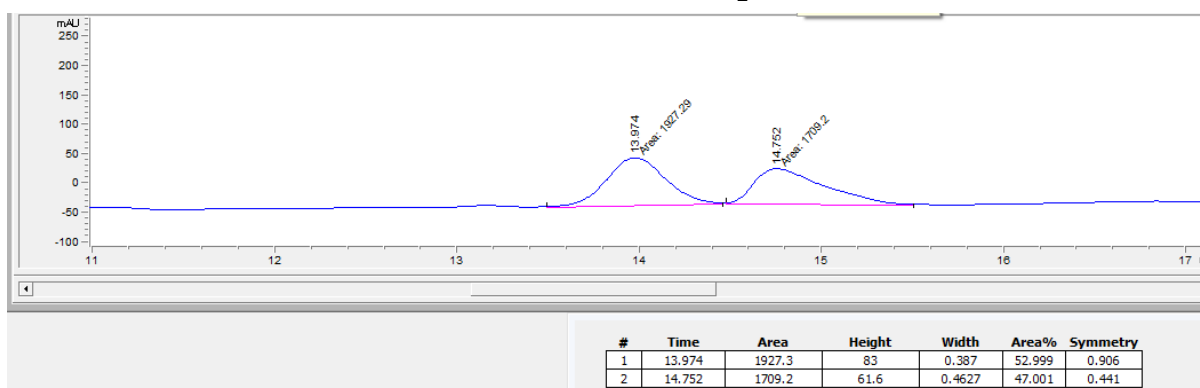

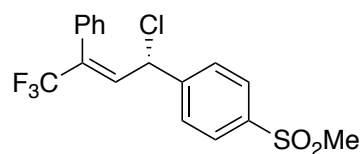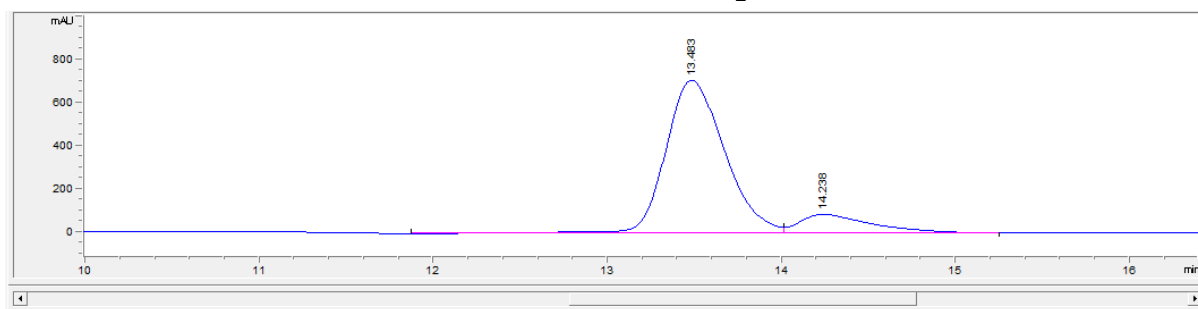

| # | Time   | Area    | Height | Width  | Area%  | Symmetry |
|---|--------|---------|--------|--------|--------|----------|
| 1 | 13.463 | 16741.7 | 708.6  | 0.3656 | 86.997 | 0.784    |
| 2 | 14.238 | 2502.4  | 87.2   | 0.4167 | 13.003 | 0.447    |

**(E)-2-(1-chloro-4,4,4-trifluoro-3-phenylbut-2-en-1-yl)naphthalene (2g)**

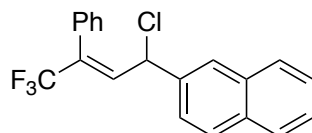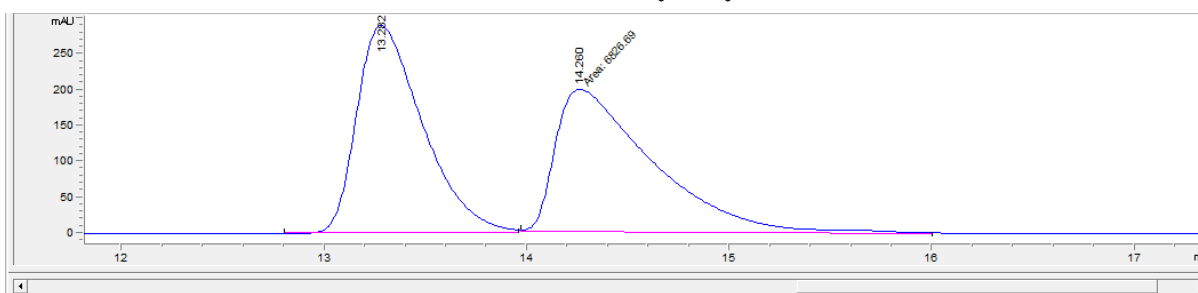

| # | Time   | Area   | Height | Width  | Area%  | Symmetry |
|---|--------|--------|--------|--------|--------|----------|
| 1 | 13.282 | 6605   | 290.6  | 0.3452 | 49.175 | 0.561    |
| 2 | 14.26  | 6826.7 | 200.6  | 0.5671 | 50.825 | 0.319    |

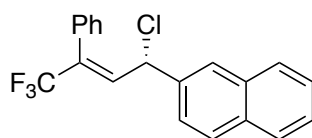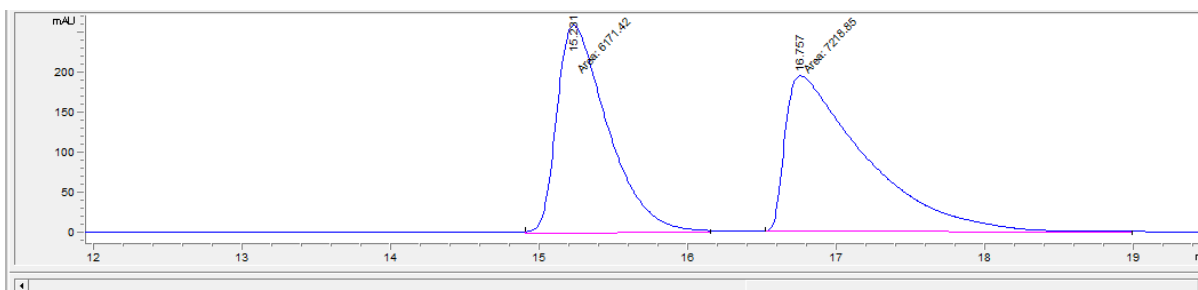

| # | Time   | Area   | Height | Width  | Area%  | Symmetry |
|---|--------|--------|--------|--------|--------|----------|
| 1 | 15.231 | 6171.4 | 258.6  | 0.3978 | 46.089 | 0.488    |
| 2 | 16.757 | 7218.8 | 193.2  | 0.6227 | 53.911 | 0.225    |



**(E)-(1-chloro-4,4,4-trifluoro-3-methylbut-2-en-1-yl)benzene (2k)**

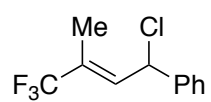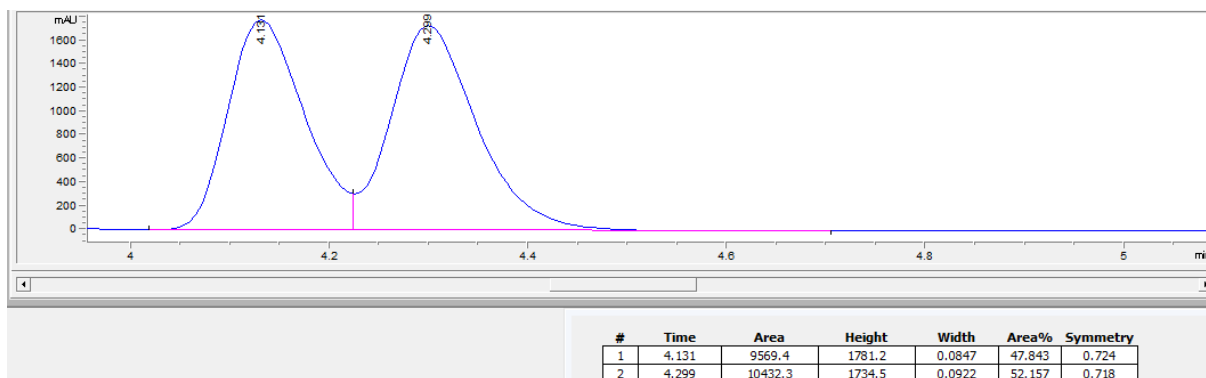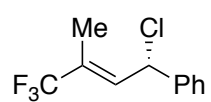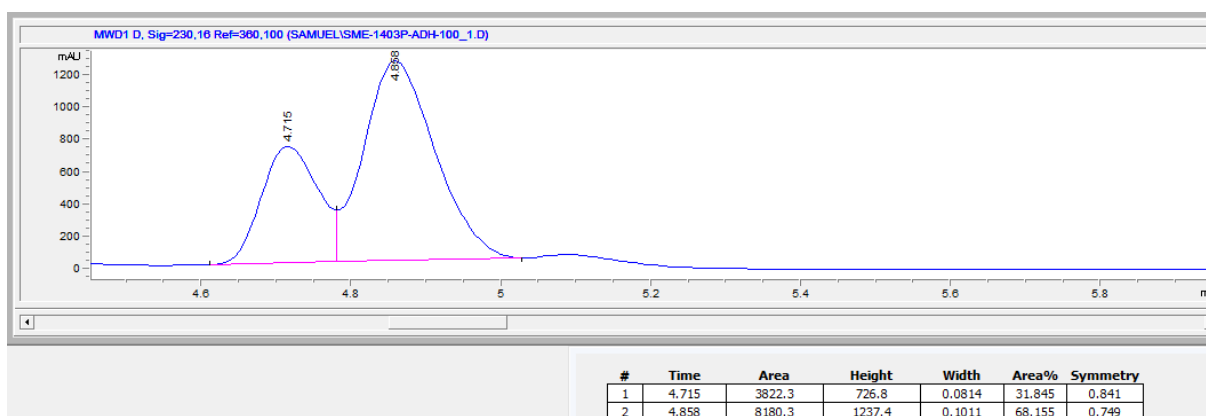

## HPLC Chromatograms of vinyl chlorides 5a, 5b, 5c, 5d, 5e, 5m and 5g

### (Z)-(1-chloro-4,4,4-trifluorobut-1-ene-1,3-diyl)dibenzene (5a)

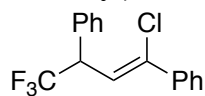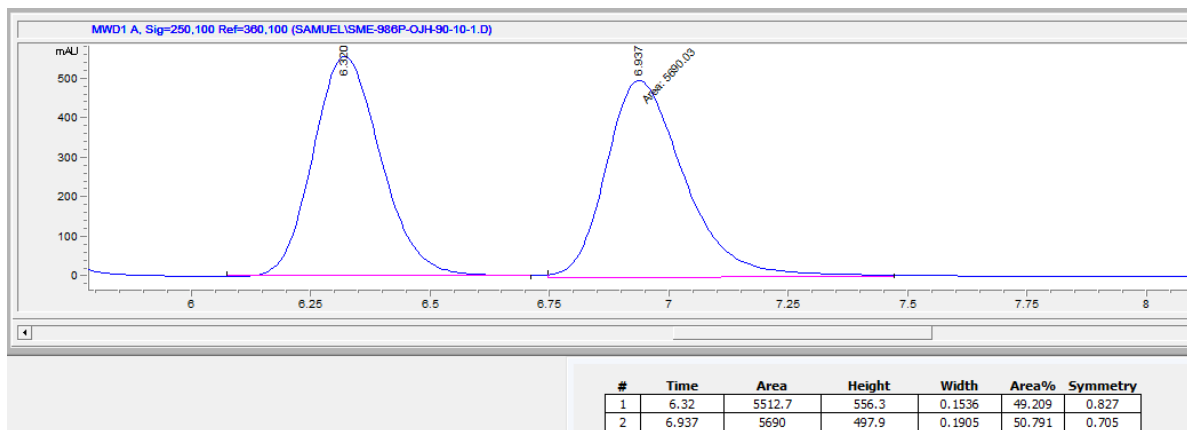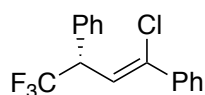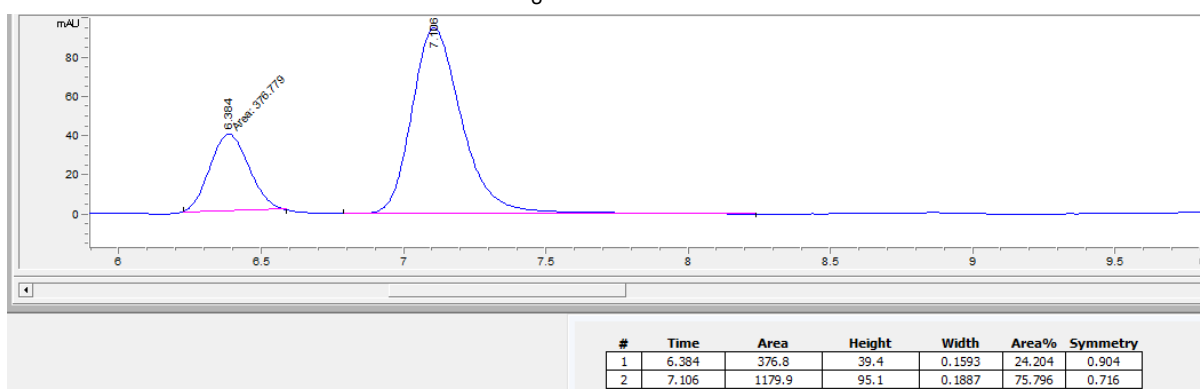

### (Z)-1-bromo-4-(1-chloro-4,4,4-trifluoro-3-phenylbut-1-en-1-yl)benzene (5b)

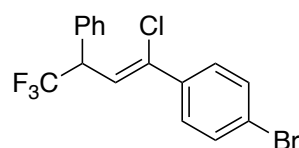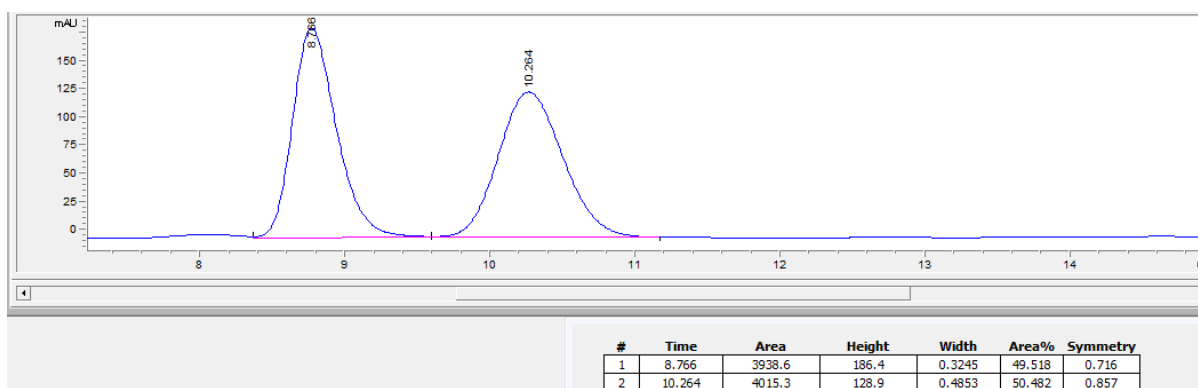

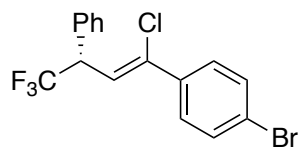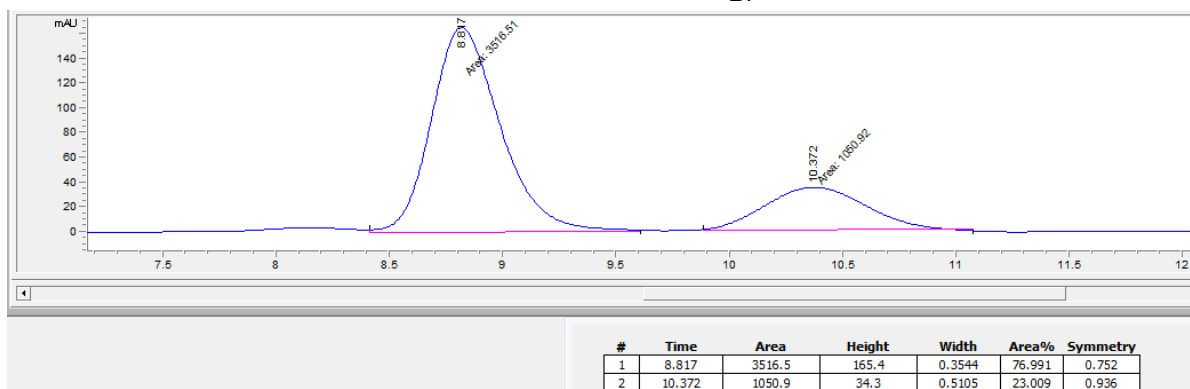

(Z)-1-(1-chloro-4,4,4-trifluoro-3-phenylbut-1-en-1-yl)-4-(trifluoromethyl)benzene (5c)

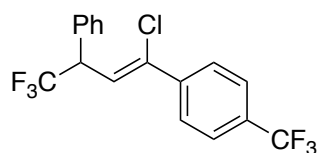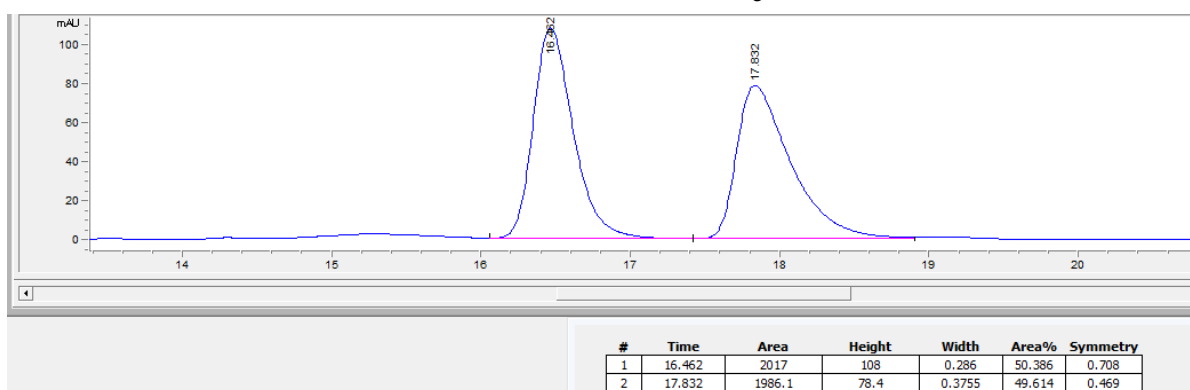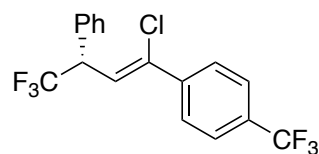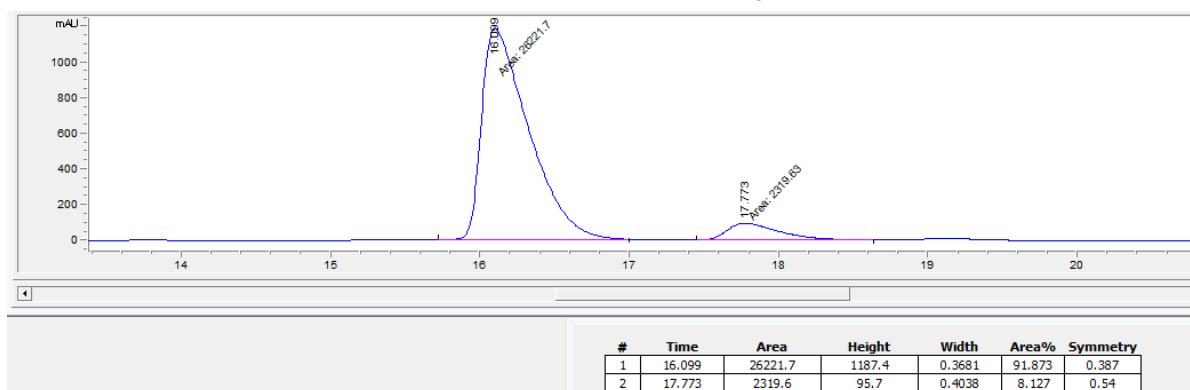

**(Z)-4-(1-chloro-4,4,4-trifluoro-3-phenylbut-1-en-1-yl)benzonitrile (5d)**

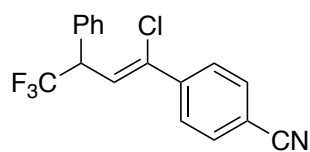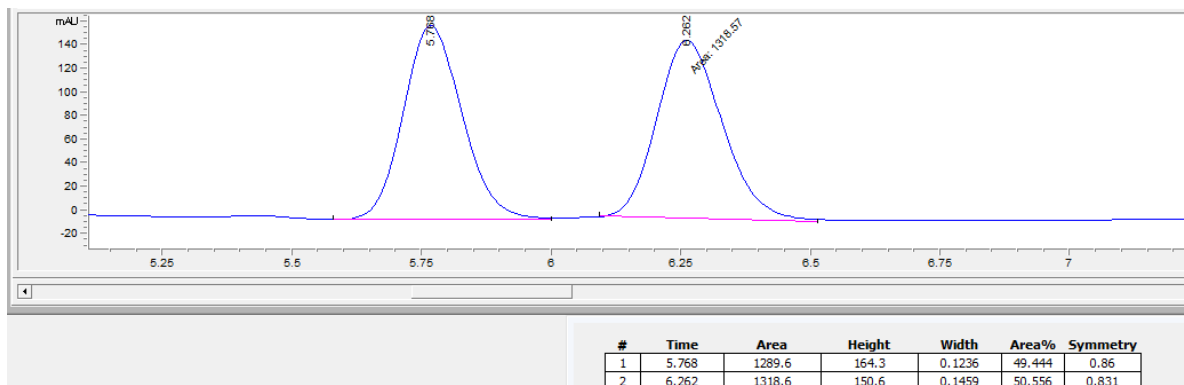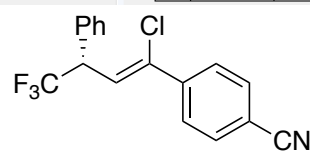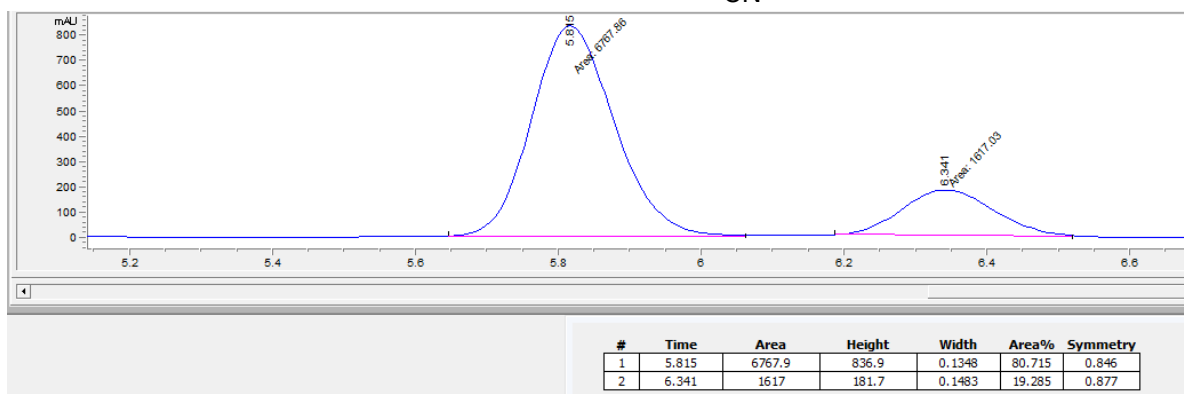

**(Z)-1-(1-chloro-4,4,4-trifluoro-3-phenylbut-1-en-1-yl)-4-(methylsulfonyl)benzene (5e)**

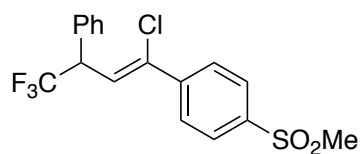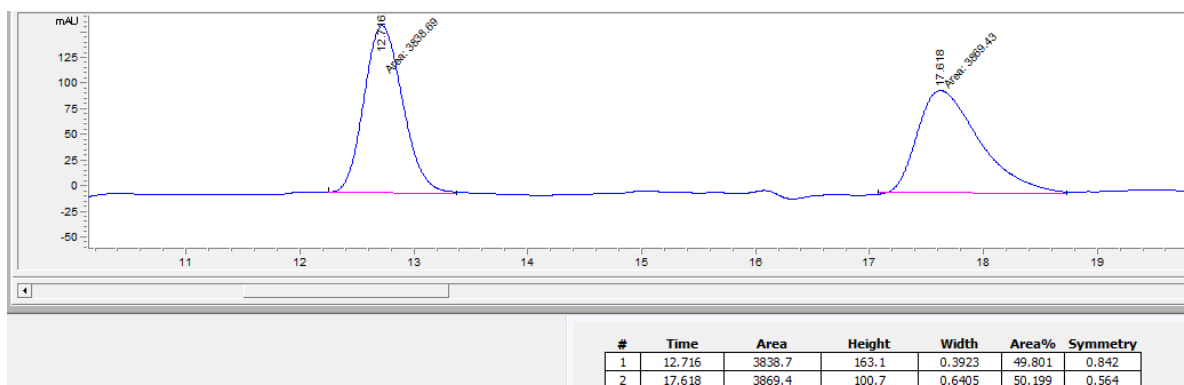

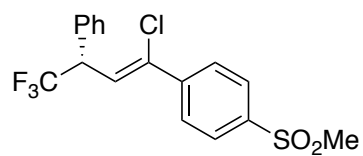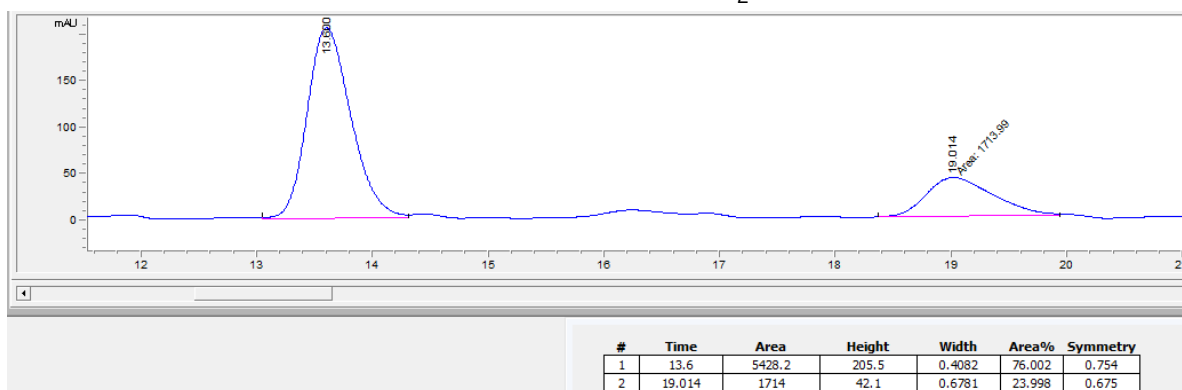

**(Z)-2-(1-chloro-4,4,4-trifluoro-3-phenylbut-1-en-1-yl)naphthalene (5g)**

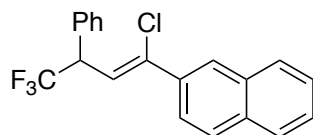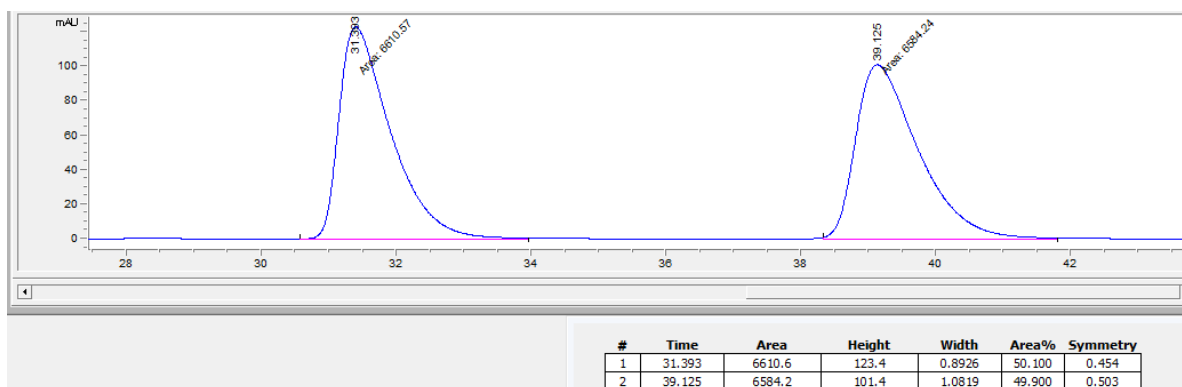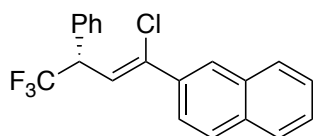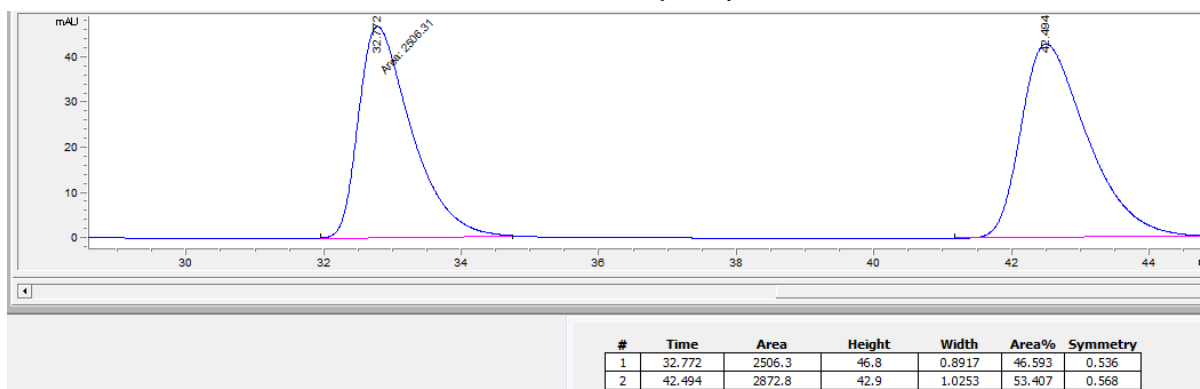

**(Z)-(1-chloro-4,4,4-trifluoro-3-methylbut-1-en-1-yl)benzene (5k)**

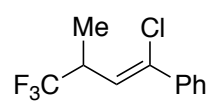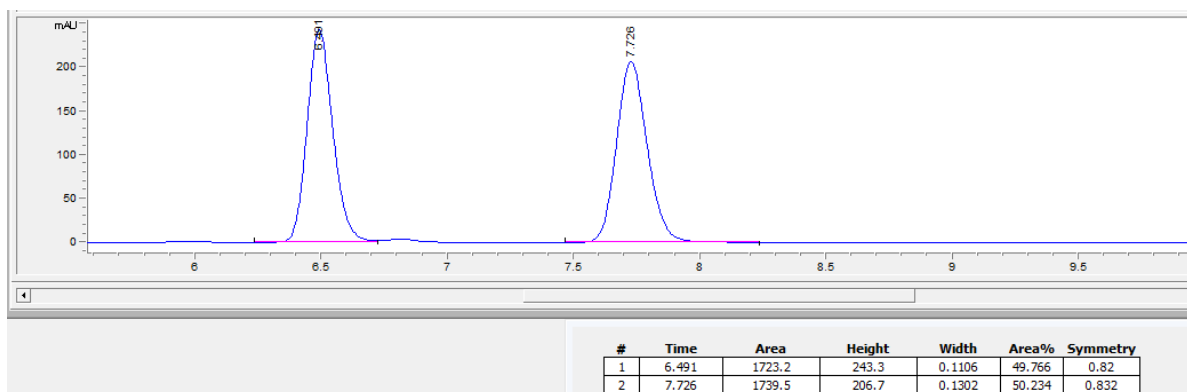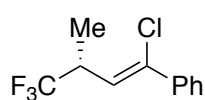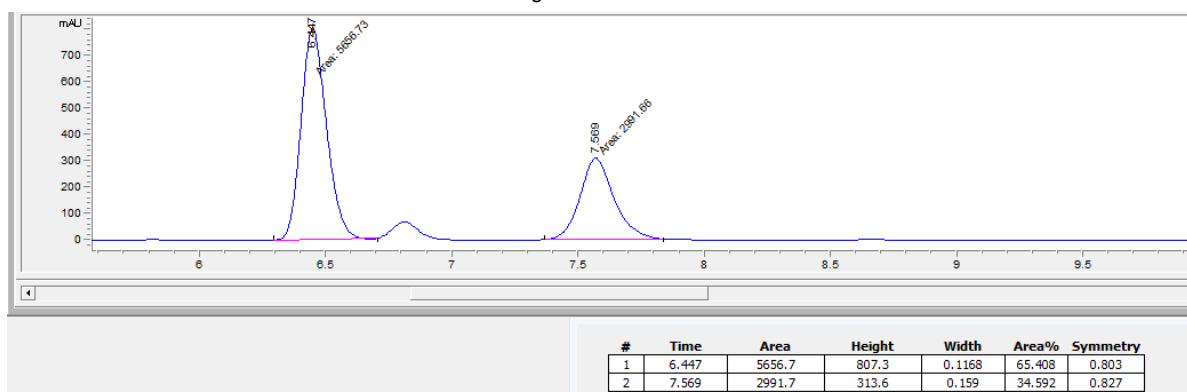

Supplement: ol0c01200_si_002.pdf [file ol0c01200_si_002.pdf]
